# Supplementary material for: PURE-seq identifies Egr1 as a Potential Master Regulator in Murine Aging by Sequencing Long-Term Hematopoietic Stem Cells
Source: Research Square preprint supplement (doi:10.21203/rs.3.rs-4863813/v1), 2024-08-12
Supplement: Supplementary file 1 [file Supplementary Table 1.xlsx]

## Sheet: Supplementary Table 1A
Supplementary Table 1A. Cluster marker gene list for PURE-seq scRNA-seq data of LT-HSCs from young (n=2), middle-aged (n=3), and old (n=3) mice samples.
	p_val	avg_log2FC	pct.1	pct.2	p_val_adj	cluster	gene
Txnip	6.99758e-60	0.572095	0.908	0.758	1.04621e-55	0	Txnip
Ifitm1	3.2118e-50	0.49608	0.934	0.822	4.80196e-46	0	Ifitm1
Glul	1.97592e-47	0.632433	0.703	0.496	2.9542e-43	0	Glul
Sult1a1	3.39868e-31	0.70958	0.533	0.373	5.08137e-27	0	Sult1a1
Hlf	2.25687e-29	0.43294	0.738	0.588	3.37424e-25	0	Hlf
Gimap6	1.11144e-28	0.629411	0.535	0.368	1.66171e-24	0	Gimap6
Gabarapl1	5.54584e-27	0.438959	0.695	0.545	8.29158e-23	0	Gabarapl1
Selenop	2.78395e-25	0.600125	0.494	0.351	4.16228e-21	0	Selenop
Egr1	2.83528e-25	0.703347	0.489	0.354	4.23903e-21	0	Egr1
Itsn1	3.62927e-25	0.579163	0.484	0.335	5.42612e-21	0	Itsn1
Junb	3.62817e-24	0.635454	0.53	0.382	5.42448e-20	0	Junb
Ier2	5.57688e-24	0.687568	0.53	0.392	8.33799e-20	0	Ier2
Pdzk1ip1	1.04952e-23	0.445297	0.684	0.548	1.56913e-19	0	Pdzk1ip1
Neat1	3.14028e-23	1.10063	0.252	0.146	4.69504e-19	0	Neat1
Hacd4	1.53703e-22	0.511254	0.527	0.385	2.29801e-18	0	Hacd4
Tsc22d1	2.1963e-22	0.471308	0.555	0.41	3.28368e-18	0	Tsc22d1
Trim47	6.32685e-21	0.553031	0.473	0.339	9.45927e-17	0	Trim47
Pik3r1	1.06034e-20	0.476661	0.602	0.468	1.58532e-16	0	Pik3r1
Zfp36	1.11383e-20	0.550028	0.449	0.318	1.66529e-16	0	Zfp36
Pik3ip1	1.13104e-20	0.586987	0.441	0.313	1.69102e-16	0	Pik3ip1
Pim1	4.65942e-20	0.38975	0.639	0.496	6.9663e-16	0	Pim1
Clk1	6.62979e-20	0.477386	0.548	0.421	9.9122e-16	0	Clk1
Fos	3.69811e-19	0.715656	0.516	0.41	5.52904e-15	0	Fos
Klf6	9.1052e-19	0.649656	0.381	0.263	1.36132e-14	0	Klf6
Ppp1r15a	1.51445e-17	0.64991	0.356	0.245	2.26426e-13	0	Ppp1r15a
Ltb	2.10578e-17	0.575753	0.372	0.257	3.14836e-13	0	Ltb
Gimap1	1.25896e-16	0.59482	0.419	0.307	1.88228e-12	0	Gimap1
Rab38	1.51826e-16	0.402175	0.55	0.423	2.26995e-12	0	Rab38
Pnrc1	1.33978e-15	0.460831	0.459	0.343	2.00311e-11	0	Pnrc1
Procr	1.67347e-15	0.530957	0.386	0.276	2.50201e-11	0	Procr
Map1lc3b	2.86783e-15	0.438387	0.542	0.427	4.28769e-11	0	Map1lc3b
Mllt3	4.91162e-15	0.308062	0.578	0.452	7.34336e-11	0	Mllt3
Ypel3	8.41508e-15	0.547436	0.319	0.219	1.25814e-10	0	Ypel3
Myct1	8.51334e-15	0.362087	0.536	0.413	1.27283e-10	0	Myct1
Cbx6	1.18369e-13	0.354812	0.538	0.421	1.76973e-09	0	Cbx6
Tsc22d3	2.14778e-13	0.417526	0.474	0.365	3.21115e-09	0	Tsc22d3
Use1	3.11205e-13	0.39226	0.521	0.412	4.65283e-09	0	Use1
Laptm5	2.14423e-12	0.28664	0.698	0.593	3.20584e-08	0	Laptm5
Samsn1	5.08587e-11	0.296279	0.536	0.435	7.60389e-07	0	Samsn1
Aldoa	7.84242e-11	0.295946	0.622	0.52	1.17252e-06	0	Aldoa
Ifi203	2.63068e-10	0.328784	0.454	0.354	3.93312e-06	0	Ifi203
Myl10	8.20857e-67	1.12767	0.702	0.493	1.22726e-62	1	Myl10
Kxd1	5.23982e-59	0.640541	0.806	0.706	7.83406e-55	1	Kxd1
Gm10260	1.55042e-42	0.865826	0.477	0.283	2.31804e-38	1	Gm10260
Rrm2b	1.7551e-36	0.534401	0.751	0.645	2.62405e-32	1	Rrm2b
Mtcl1	6.2283e-36	0.6672	0.542	0.349	9.31194e-32	1	Mtcl1
Ide	1.44269e-32	0.520079	0.768	0.662	2.15697e-28	1	Ide
Ptprcap	3.53545e-32	0.385518	0.888	0.78	5.28585e-28	1	Ptprcap
Cd63	3.61845e-32	0.484376	0.773	0.601	5.40994e-28	1	Cd63
Ddah1	2.95058e-31	0.563024	0.652	0.488	4.41141e-27	1	Ddah1
Nup93	4.67206e-31	0.552144	0.657	0.507	6.98519e-27	1	Nup93
Prtn3	1.73406e-30	0.374753	0.723	0.545	2.5926e-26	1	Prtn3
Rabac1	3.97455e-30	0.515628	0.633	0.445	5.94234e-26	1	Rabac1
Nupr1	8.56636e-30	0.885912	0.423	0.269	1.28076e-25	1	Nupr1
Ifitm11	1.17089e-27	0.328537	0.931	0.825	1.7506e-23	1	Ifitm1
Hsd17b10	1.25939e-27	0.602577	0.494	0.329	1.88291e-23	1	Hsd17b10
Ptpn18	3.9585e-27	0.358687	0.839	0.705	5.91835e-23	1	Ptpn18
Pdzk1ip11	1.76743e-26	0.425638	0.724	0.541	2.64249e-22	1	Pdzk1ip1
Nmnat3	3.06135e-25	0.638743	0.44	0.289	4.57702e-21	1	Nmnat3
Mrpl52	5.20352e-25	0.40712	0.743	0.59	7.77979e-21	1	Mrpl52
Spag6l	1.07696e-24	0.465094	0.652	0.51	1.61016e-20	1	Spag6l
Smim27	2.85363e-24	0.631153	0.42	0.27	4.26646e-20	1	Smim27
Trmt112	1.62458e-23	0.449814	0.627	0.465	2.42891e-19	1	Trmt112
Grik3	3.98619e-23	0.546727	0.517	0.364	5.95976e-19	1	Grik3
Mt1	6.05151e-23	0.654475	0.5	0.355	9.04762e-19	1	Mt1
Gng11	2.9841e-22	0.432985	0.612	0.458	4.46153e-18	1	Gng11
Yjefn3	3.58249e-22	0.60244	0.385	0.246	5.35619e-18	1	Yjefn3
Aprt	4.21668e-22	0.56497	0.455	0.311	6.30435e-18	1	Aprt
Bola2	1.11346e-21	0.43441	0.663	0.511	1.66473e-17	1	Bola2
Acyp1	1.38133e-21	0.637448	0.383	0.249	2.06523e-17	1	Acyp1
Ssr4	1.81202e-21	0.413642	0.595	0.44	2.70916e-17	1	Ssr4
Nrg1	3.14197e-21	0.385752	0.728	0.614	4.69755e-17	1	Nrg1
Cox14	3.9573e-21	0.422279	0.602	0.442	5.91656e-17	1	Cox14
Gm11361	4.31567e-21	0.29988	0.877	0.775	6.45236e-17	1	Gm11361
S100a11	1.16071e-20	0.387058	0.564	0.405	1.73538e-16	1	S100a11
Ost4	2.93455e-20	0.432076	0.597	0.448	4.38744e-16	1	Ost4
Use11	5.36989e-20	0.43744	0.553	0.407	8.02853e-16	1	Use1
Ifitm2	7.28063e-20	0.308964	0.83	0.719	1.08853e-15	1	Ifitm2
Psenen	1.00394e-19	0.446965	0.531	0.383	1.501e-15	1	Psenen
Pold4	1.65267e-19	0.712714	0.281	0.169	2.4709e-15	1	Pold4
Grcc10	1.8925e-19	0.335265	0.765	0.631	2.82948e-15	1	Grcc10
Ndufa7	5.45654e-19	0.4073	0.644	0.508	8.15808e-15	1	Ndufa7
Naa38	7.70456e-19	0.450866	0.516	0.376	1.15191e-14	1	Naa38
Cfap77	1.40201e-18	0.510534	0.471	0.335	2.09614e-14	1	Cfap77
C330007P06Rik	2.038e-18	0.35993	0.723	0.618	3.04701e-14	1	C330007P06Rik
Cops9	2.8886e-18	0.450306	0.553	0.417	4.31875e-14	1	Cops9
Gng5	4.68414e-18	0.364775	0.682	0.559	7.00326e-14	1	Gng5
Uba7	7.7227e-18	0.387241	0.654	0.505	1.15462e-13	1	Uba7
Orc5	7.90593e-18	0.477437	0.447	0.315	1.18202e-13	1	Orc5
Polr2l	8.11467e-18	0.564871	0.397	0.276	1.21322e-13	1	Polr2l
Plcb1	1.79044e-17	0.466696	0.503	0.369	2.67689e-13	1	Plcb1
Uqcc3	2.02679e-17	0.543796	0.392	0.27	3.03025e-13	1	Uqcc3
Emp3	2.19377e-17	0.425992	0.541	0.411	3.27991e-13	1	Emp3
Hint2	2.54976e-17	0.491781	0.416	0.29	3.81215e-13	1	Hint2
S100a13	3.50953e-17	0.459719	0.446	0.315	5.2471e-13	1	S100a13
Guca1a	1.27175e-16	0.642591	0.298	0.193	1.9014e-12	1	Guca1a
Tecpr2	2.11532e-16	0.325303	0.743	0.637	3.16261e-12	1	Tecpr2
Tsc22d11	2.32971e-16	0.385999	0.552	0.413	3.48315e-12	1	Tsc22d1
Lst1	3.13348e-16	0.498889	0.426	0.306	4.68486e-12	1	Lst1
H2-T23	3.2439e-16	0.512098	0.406	0.287	4.84996e-12	1	H2-T23
Ftl1-ps1	3.95782e-16	0.333248	0.727	0.622	5.91733e-12	1	Ftl1-ps1
Heph	1.12952e-15	0.281187	0.744	0.642	1.68875e-11	1	Heph
Hsbp1	1.25745e-15	0.425181	0.496	0.374	1.88001e-11	1	Hsbp1
Gm8797	1.79951e-15	0.305051	0.759	0.645	2.69044e-11	1	Gm8797
Map1lc3b1	1.95827e-15	0.390696	0.551	0.427	2.92781e-11	1	Map1lc3b
Bloc1s1	3.38099e-15	0.570611	0.341	0.234	5.05492e-11	1	Bloc1s1
Fxyd5	3.70487e-15	0.322159	0.663	0.535	5.53916e-11	1	Fxyd5
Ramp1	3.72783e-15	0.445721	0.453	0.334	5.57347e-11	1	Ramp1
Pnpla7	4.16846e-15	0.365474	0.567	0.439	6.23226e-11	1	Pnpla7
Rangrf	4.3664e-15	0.575759	0.284	0.183	6.5282e-11	1	Rangrf
Ndufaf8	4.88514e-15	0.468699	0.392	0.277	7.30378e-11	1	Ndufaf8
Ldhb	1.11102e-14	0.525019	0.348	0.241	1.66109e-10	1	Ldhb
Def8	1.68889e-14	0.393726	0.444	0.318	2.52506e-10	1	Def8
Dpm3	1.87753e-14	0.354641	0.561	0.434	2.8071e-10	1	Dpm3
Cst3	2.76746e-14	0.272268	0.694	0.573	4.13763e-10	1	Cst3
Phpt1	2.92822e-14	0.463597	0.343	0.234	4.37798e-10	1	Phpt1
Glipr1	3.44716e-14	0.360625	0.43	0.309	5.15385e-10	1	Glipr1
Aldoa1	4.18415e-14	0.301299	0.648	0.516	6.25572e-10	1	Aldoa
Vat1	6.53449e-14	0.477308	0.338	0.232	9.76972e-10	1	Vat1
Rbis	8.33656e-14	0.419764	0.456	0.344	1.2464e-09	1	Rbis
Anapc13	8.97207e-14	0.401796	0.497	0.379	1.34141e-09	1	Anapc13
Atp6v1f	1.01447e-13	0.319886	0.529	0.401	1.51673e-09	1	Atp6v1f
Cstb	1.02981e-13	0.502049	0.346	0.242	1.53967e-09	1	Cstb
Usp50	1.53958e-13	0.351684	0.465	0.343	2.30183e-09	1	Usp50
Polr2k	1.71093e-13	0.432361	0.419	0.305	2.55802e-09	1	Polr2k
Dynlrb1	1.74885e-13	0.331387	0.501	0.376	2.61471e-09	1	Dynlrb1
Tbca	1.96203e-13	0.347012	0.572	0.45	2.93343e-09	1	Tbca
Pigp	2.56951e-13	0.485869	0.354	0.251	3.84167e-09	1	Pigp
Cnbd2	3.28164e-13	0.30672	0.703	0.594	4.90639e-09	1	Cnbd2
Ndufc2	3.6847e-13	0.282347	0.585	0.453	5.50899e-09	1	Ndufc2
Pebp1	4.99458e-13	0.341474	0.642	0.527	7.46739e-09	1	Pebp1
Acox1	5.46867e-13	0.45161	0.353	0.249	8.1762e-09	1	Acox1
Ctla4	6.9718e-13	0.350581	0.478	0.362	1.04235e-08	1	Ctla4
Mtln	9.36399e-13	0.433698	0.376	0.271	1.40001e-08	1	Mtln
Gadd45gip1	9.40868e-13	0.421918	0.349	0.246	1.40669e-08	1	Gadd45gip1
S100a10	1.26976e-12	0.315778	0.493	0.377	1.89842e-08	1	S100a10
Anxa5	1.40748e-12	0.408173	0.398	0.29	2.10432e-08	1	Anxa5
Gsto1	1.55232e-12	0.40692	0.418	0.311	2.32087e-08	1	Gsto1
Lyl1	1.98016e-12	0.319227	0.513	0.396	2.96054e-08	1	Lyl1
Atox1	2.07119e-12	0.359646	0.478	0.366	3.09664e-08	1	Atox1
Tmem258	2.42591e-12	0.308343	0.592	0.475	3.62698e-08	1	Tmem258
mt-Nd5	2.69129e-12	0.342592	0.459	0.342	4.02375e-08	1	mt-Nd5
Ninj1	2.72657e-12	0.376414	0.408	0.303	4.07649e-08	1	Ninj1
Polr2f	3.2523e-12	0.352937	0.452	0.339	4.86251e-08	1	Polr2f
Cyb5a	4.26221e-12	0.317272	0.5	0.383	6.37244e-08	1	Cyb5a
Phkg1	4.33376e-12	0.36922	0.468	0.354	6.4794e-08	1	Phkg1
Slc48a1	5.33535e-12	0.389869	0.465	0.36	7.97688e-08	1	Slc48a1
Park7	9.43456e-12	0.279332	0.59	0.47	1.41056e-07	1	Park7
Imp3	1.15219e-11	0.388069	0.39	0.288	1.72264e-07	1	Imp3
Dad1	1.34949e-11	0.36209	0.486	0.382	2.01762e-07	1	Dad1
Tmem176a	2.04625e-11	0.261943	0.532	0.408	3.05935e-07	1	Tmem176a
Tmem50a	3.16818e-11	0.349126	0.405	0.303	4.73675e-07	1	Tmem50a
Pomp	3.19025e-11	0.286706	0.588	0.472	4.76975e-07	1	Pomp
Tomm5	3.22097e-11	0.294542	0.443	0.333	4.81567e-07	1	Tomm5
Micos13	3.35325e-11	0.290583	0.502	0.389	5.01345e-07	1	Micos13
Nedd8	6.39356e-11	0.296848	0.517	0.408	9.55901e-07	1	Nedd8
Mrpl23	6.69827e-11	0.330083	0.524	0.414	1.00146e-06	1	Mrpl23
Ppdpf	6.76733e-11	0.361387	0.424	0.323	1.01178e-06	1	Ppdpf
Cpeb1	9.07079e-11	0.264251	0.573	0.452	1.35617e-06	1	Cpeb1
Slirp	1.23392e-10	0.340392	0.44	0.337	1.84483e-06	1	Slirp
Edf1	1.98747e-10	0.264852	0.53	0.414	2.97147e-06	1	Edf1
Ndufb11	2.03113e-10	0.286058	0.558	0.454	3.03674e-06	1	Ndufb11
Ndufb9	3.61442e-10	0.273955	0.584	0.47	5.40392e-06	1	Ndufb9
Creg1	6.34749e-10	0.251056	0.604	0.497	9.49014e-06	1	Creg1
Dbi	6.91149e-10	0.277778	0.522	0.412	1.03334e-05	1	Dbi
Spns2	9.54362e-10	0.278891	0.491	0.386	1.42687e-05	1	Spns2
BC004004	1.08805e-09	0.260199	0.609	0.507	1.62674e-05	1	BC004004
Tbc1d22b	0	3.65333	0.954	0.245	0	2	Tbc1d22b
Spidr	0	3.67726	0.928	0.255	0	2	Spidr
Vps8	4.73082e-153	2.38312	0.438	0.098	7.07305e-149	2	Vps8
Rab39	1.88895e-52	0.622317	0.885	0.648	2.82416e-48	2	Rab39
Ifitm12	2.84046e-49	0.612865	0.959	0.829	4.24677e-45	2	Ifitm1
Rrm2b1	3.8883e-48	0.626364	0.872	0.637	5.8134e-44	2	Rrm2b
Kxd11	5.27821e-44	0.569725	0.897	0.702	7.89145e-40	2	Kxd1
Spag6l1	6.77639e-41	0.682315	0.755	0.508	1.01314e-36	2	Spag6l
Ddah11	1.00319e-38	0.66186	0.741	0.489	1.49988e-34	2	Ddah1
Gm2000	8.41797e-38	0.462214	0.969	0.863	1.25857e-33	2	Gm2000
Nrg11	1.29695e-37	0.572918	0.847	0.607	1.93907e-33	2	Nrg1
Cnbd21	1.05869e-35	0.585186	0.819	0.588	1.58285e-31	2	Cnbd2
Tecpr21	1.16186e-35	0.535127	0.849	0.631	1.7371e-31	2	Tecpr2
Carf	3.86648e-35	0.510817	0.876	0.651	5.78077e-31	2	Carf
Kalrn	1.00313e-34	0.510444	0.878	0.654	1.49978e-30	2	Kalrn
Heph1	5.78822e-34	0.509624	0.862	0.635	8.65397e-30	2	Heph
Gm113611	4.64017e-33	0.43149	0.926	0.777	6.93752e-29	2	Gm11361
AC124742.1	1.1549e-32	0.522423	0.853	0.628	1.72669e-28	2	AC124742.1
Nup931	4.06387e-32	0.633471	0.717	0.511	6.07589e-28	2	Nup93
Vmp1	2.35678e-29	0.43145	0.905	0.725	3.52363e-25	2	Vmp1
Grik31	2.39363e-28	0.714863	0.571	0.369	3.57871e-24	2	Grik3
Adgb	1.16775e-27	0.428268	0.851	0.619	1.7459e-23	2	Adgb
Cpeb11	2.26662e-27	0.595756	0.664	0.449	3.38882e-23	2	Cpeb1
Ide1	4.72605e-27	0.47165	0.829	0.663	7.06591e-23	2	Ide
Mtcl11	9.9153e-27	0.684464	0.563	0.361	1.48244e-22	2	Mtcl1
Pnpla71	4.74244e-26	0.597946	0.637	0.44	7.09043e-22	2	Pnpla7
Tbc1d2b	5.65632e-24	0.396489	0.862	0.662	8.45676e-20	2	Tbc1d2b
Cnot6	6.26739e-24	0.386392	0.89	0.724	9.37038e-20	2	Cnot6
Arih1	1.98738e-23	0.381296	0.891	0.717	2.97133e-19	2	Arih1
Slc22a27	7.76951e-23	0.409215	0.79	0.582	1.16162e-18	2	Slc22a27
C330007P06Rik1	1.74488e-22	0.414122	0.804	0.616	2.60878e-18	2	C330007P06Rik
Pdzk1ip12	2.56565e-22	0.502144	0.718	0.557	3.8359e-18	2	Pdzk1ip1
Sult1a11	6.45038e-21	0.647054	0.56	0.385	9.64397e-17	2	Sult1a1
Cfap771	2.72337e-20	0.599806	0.512	0.34	4.07171e-16	2	Cfap77
Prtn31	2.93093e-20	0.347362	0.717	0.56	4.38204e-16	2	Prtn3
Gm102601	3.74377e-20	0.678433	0.46	0.301	5.5973e-16	2	Gm10260
Pde4d	7.70705e-20	0.402809	0.772	0.574	1.15228e-15	2	Pde4d
Skint6	1.26892e-19	0.435447	0.704	0.512	1.89716e-15	2	Skint6
Jun	1.86605e-19	0.538805	0.656	0.503	2.78993e-15	2	Jun
Tns2	5.82349e-18	0.874972	0.264	0.143	8.7067e-14	2	Tns2
Plcl1	1.94657e-17	0.488795	0.417	0.262	2.91032e-13	2	Plcl1
Myl101	1.9577e-17	0.614233	0.654	0.516	2.92696e-13	2	Myl10
Tgm2	2.15297e-17	0.446395	0.676	0.515	3.2189e-13	2	Tgm2
Chrm3	2.85253e-17	0.553512	0.383	0.239	4.26481e-13	2	Chrm3
Gabrb1	4.35708e-17	0.537935	0.485	0.328	6.51427e-13	2	Gabrb1
Fgfr2	1.32621e-16	0.43499	0.613	0.437	1.98282e-12	2	Fgfr2
Plcb11	1.75558e-16	0.47643	0.538	0.375	2.62476e-12	2	Plcb1
Cdkn1c	1.7647e-16	0.848004	0.253	0.14	2.6384e-12	2	Cdkn1c
1700016D06Rik	2.66584e-16	0.295653	0.756	0.562	3.98569e-12	2	1700016D06Rik
Ier21	4.45296e-16	0.616304	0.541	0.404	6.65763e-12	2	Ier2
Ctla41	4.66154e-16	0.512113	0.524	0.365	6.96947e-12	2	Ctla4
Junb1	5.77177e-16	0.542649	0.542	0.395	8.62938e-12	2	Junb
Gda	7.4167e-16	0.490698	0.537	0.384	1.10887e-11	2	Gda
Trim471	8.33832e-16	0.524911	0.501	0.349	1.24666e-11	2	Trim47
AC149090.1	9.7646e-16	0.33697	0.821	0.704	1.45991e-11	2	AC149090.1
Ramp2	1.13817e-15	0.864371	0.279	0.164	1.70168e-11	2	Ramp2
Trpm3	1.34987e-15	0.636147	0.447	0.311	2.01819e-11	2	Trpm3
Tmem176b	1.42134e-15	0.392607	0.718	0.561	2.12505e-11	2	Tmem176b
Fos1	2.83723e-15	0.551121	0.558	0.415	4.24194e-11	2	Fos
C9orf72	2.84872e-15	0.263001	0.796	0.599	4.25912e-11	2	C9orf72
Il1rapl2	7.59877e-15	0.368317	0.465	0.309	1.13609e-10	2	Il1rapl2
Prdm16	1.5884e-14	0.541434	0.401	0.265	2.37481e-10	2	Prdm16
Rdh5	2.21434e-14	0.818112	0.259	0.152	3.31066e-10	2	Rdh5
Cish	3.549e-14	0.680589	0.295	0.179	5.30611e-10	2	Cish
Tmem63c	4.31092e-14	0.614339	0.363	0.236	6.44526e-10	2	Tmem63c
Gimap61	8.42338e-14	0.508825	0.527	0.386	1.25938e-09	2	Gimap6
Btbd7	1.13507e-13	0.467183	0.508	0.368	1.69704e-09	2	Btbd7
Mettl7a1	1.36642e-13	0.478633	0.476	0.333	2.04294e-09	2	Mettl7a1
Coq8a	2.1226e-13	0.570639	0.403	0.275	3.1735e-09	2	Coq8a
Gvin1	5.35121e-13	0.476661	0.392	0.26	8.00059e-09	2	Gvin1
Mamdc4	1.20106e-12	0.642122	0.263	0.159	1.79571e-08	2	Mamdc4
Egr11	1.76734e-12	0.341744	0.503	0.365	2.64235e-08	2	Egr1
Magi2	2.48134e-12	0.415909	0.373	0.248	3.70985e-08	2	Magi2
Slc35f3	2.57389e-12	0.593972	0.342	0.229	3.84822e-08	2	Slc35f3
Nupr11	3.10426e-12	0.456251	0.405	0.283	4.64119e-08	2	Nupr1
Nmnat31	3.15184e-12	0.502991	0.428	0.302	4.71232e-08	2	Nmnat3
Procr1	3.78264e-12	0.503714	0.406	0.285	5.65542e-08	2	Procr
Plxdc2	5.07978e-12	0.437168	0.431	0.302	7.59478e-08	2	Plxdc2
Efcab8	5.20011e-12	0.647077	0.323	0.214	7.77469e-08	2	Efcab8
Ppp1r15a1	5.64216e-12	0.547161	0.371	0.254	8.43559e-08	2	Ppp1r15a
Pam	5.93466e-12	0.407321	0.569	0.433	8.87292e-08	2	Pam
Adgrl4	8.3054e-12	0.313603	0.713	0.584	1.24174e-07	2	Adgrl4
Ly6a	1.4759e-11	0.362207	0.491	0.356	2.20662e-07	2	Ly6a
Gabarapl11	1.53772e-11	0.380033	0.679	0.561	2.29904e-07	2	Gabarapl1
Alcam	1.90994e-11	0.511716	0.392	0.275	2.85555e-07	2	Alcam
Gm4070	3.05899e-11	0.36931	0.381	0.258	4.57349e-07	2	Gm4070
S100a6	3.72485e-11	0.467123	0.438	0.321	5.56902e-07	2	S100a6
Vwf	4.5317e-11	0.424297	0.524	0.402	6.77534e-07	2	Vwf
Gm12185	4.53861e-11	0.379116	0.383	0.264	6.78568e-07	2	Gm12185
Anks1b	5.02993e-11	0.489004	0.388	0.271	7.52024e-07	2	Anks1b
Gng111	5.68784e-11	0.392615	0.603	0.472	8.5039e-07	2	Gng11
Pou2f3	8.85038e-11	0.505759	0.344	0.232	1.32322e-06	2	Pou2f3
Ubl7	9.15599e-11	0.543001	0.382	0.277	1.36891e-06	2	Ubl7
Por	1.92324e-10	0.419257	0.497	0.382	2.87543e-06	2	Por
Tmem176a1	1.95981e-10	0.382442	0.542	0.416	2.93012e-06	2	Tmem176a
Orc51	2.22714e-10	0.508519	0.437	0.327	3.3298e-06	2	Orc5
Dhx32	2.79558e-10	0.463898	0.431	0.321	4.17968e-06	2	Dhx32
Uba71	3.26782e-10	0.324865	0.641	0.519	4.88572e-06	2	Uba7
Luc7l	3.51339e-10	0.301174	0.662	0.539	5.25288e-06	2	Luc7l
Lst11	3.6735e-10	0.390577	0.433	0.315	5.49226e-06	2	Lst1
Erg	4.83442e-10	0.423456	0.506	0.386	7.22793e-06	2	Erg
Pik3r11	4.8374e-10	0.372072	0.595	0.482	7.2324e-06	2	Pik3r1
Selenop1	6.94747e-10	0.399876	0.481	0.367	1.03872e-05	2	Selenop
Clec1a	8.17404e-10	0.46397	0.34	0.234	1.2221e-05	2	Clec1a
Taf1c	9.41201e-10	0.380413	0.503	0.384	1.40719e-05	2	Taf1c
Mllt31	9.50856e-10	0.305065	0.587	0.463	1.42163e-05	2	Mllt3
Scarf1	1.35441e-09	0.467955	0.383	0.279	2.02497e-05	2	Scarf1
Yjefn31	1.41425e-09	0.491968	0.363	0.26	2.11445e-05	2	Yjefn3
Jund	1.49835e-09	0.417195	0.45	0.338	2.24019e-05	2	Jund
Vat11	1.54428e-09	0.511848	0.341	0.24	2.30885e-05	2	Vat1
Pnrc11	1.66494e-09	0.422905	0.465	0.353	2.48925e-05	2	Pnrc1
Lcor	3.54979e-09	0.353818	0.45	0.335	5.30728e-05	2	Lcor
Hydin	3.98528e-09	0.451874	0.345	0.244	5.95839e-05	2	Hydin
Nr4a1	4.58857e-09	0.405831	0.353	0.251	6.86037e-05	2	Nr4a1
Lpp	4.731e-09	0.347478	0.472	0.354	7.07332e-05	2	Lpp
Rabac11	4.95548e-09	0.355084	0.577	0.467	7.40895e-05	2	Rabac1
Nup210l	6.65767e-09	0.372135	0.383	0.276	9.95388e-05	2	Nup210l
Phkg11	1.14291e-08	0.305906	0.481	0.361	0.000170876	2	Phkg1
Shisa5	2.55554e-08	0.266116	0.54	0.423	0.000382079	2	Shisa5
Glul1	3.03227e-08	0.28364	0.637	0.525	0.000453355	2	Glul
Lgals3bp	6.66016e-08	0.369001	0.503	0.397	0.000995761	2	Lgals3bp
Pard3b	1.01943e-07	0.277217	0.419	0.318	0.00152415	2	Pard3b
Csgalnact1	1.0459e-07	0.309931	0.453	0.353	0.00156373	2	Csgalnact1
Zfp361	1.22322e-07	0.283961	0.438	0.332	0.00182883	2	Zfp36
Cbx61	2.75541e-07	0.349628	0.533	0.433	0.00411961	2	Cbx6
Itsn11	3.7876e-07	0.296386	0.454	0.354	0.00566285	2	Itsn1
Pim11	4.58455e-07	0.2706	0.617	0.513	0.00685437	2	Pim1
St3gal1	6.04238e-07	0.255049	0.544	0.435	0.00903396	2	St3gal1
Ung	3.16706e-237	3.52856	0.351	0.03	4.73507e-233	3	Ung
Hells	4.82952e-220	2.89157	0.463	0.069	7.22062e-216	3	Hells
Uhrf1	4.45134e-209	2.70183	0.519	0.097	6.65519e-205	3	Uhrf1
Mcm5	5.22152e-205	2.30167	0.62	0.147	7.8067e-201	3	Mcm5
Mcm6	4.11775e-200	2.04286	0.797	0.299	6.15644e-196	3	Mcm6
Mcm2	2.42591e-183	2.18459	0.61	0.158	3.62698e-179	3	Mcm2
Cdt1	1.13344e-180	2.51797	0.476	0.091	1.69461e-176	3	Cdt1
Mcm3	8.94691e-178	2.02665	0.7	0.227	1.33765e-173	3	Mcm3
Dhfr	2.05878e-177	2.89543	0.382	0.057	3.07808e-173	3	Dhfr
Dut	6.29445e-174	1.85963	0.743	0.259	9.41084e-170	3	Dut
Lig1	2.10335e-169	2.29107	0.541	0.131	3.14472e-165	3	Lig1
Pcna	2.12093e-168	1.85199	0.801	0.358	3.17101e-164	3	Pcna
Mcm7	1.019e-146	1.99263	0.626	0.207	1.52351e-142	3	Mcm7
Mcm4	9.78099e-145	2.11782	0.532	0.144	1.46236e-140	3	Mcm4
E2f1	1.01116e-136	2.72276	0.304	0.046	1.51178e-132	3	E2f1
Cdca7	8.07735e-134	1.80837	0.619	0.208	1.20764e-129	3	Cdca7
Dtl	9.38925e-132	2.48805	0.348	0.064	1.40379e-127	3	Dtl
Tipin	2.55107e-130	2.07858	0.443	0.105	3.8141e-126	3	Tipin
Slfn9	3.46204e-130	2.61847	0.346	0.065	5.1761e-126	3	Slfn9
Gins2	3.33307e-129	2.87543	0.283	0.042	4.98327e-125	3	Gins2
Nasp	1.37855e-124	2.02801	0.44	0.108	2.06107e-120	3	Nasp
H2afz	1.30233e-123	1.24714	0.908	0.616	1.94711e-119	3	H2afz
Stmn1	1.83289e-123	1.42635	0.853	0.52	2.74035e-119	3	Stmn1
Ran	1.7712e-120	1.30499	0.877	0.553	2.64811e-116	3	Ran
Gmnn	4.06973e-116	2.15906	0.365	0.078	6.08465e-112	3	Gmnn
Tyms	9.90204e-116	2.20917	0.395	0.095	1.48045e-111	3	Tyms
Prim1	1.77145e-110	2.28321	0.342	0.073	2.64849e-106	3	Prim1
Slc25a5	1.04241e-105	1.30925	0.856	0.581	1.55851e-101	3	Slc25a5
Dctpp1	2.22095e-103	1.63024	0.625	0.26	3.32055e-99	3	Dctpp1
Itga2b	5.65809e-103	1.9505	0.521	0.184	8.45941e-99	3	Itga2b
Dnmt1	4.15473e-102	1.60141	0.569	0.208	6.21173e-98	3	Dnmt1
Rrm1	4.07774e-101	1.6971	0.482	0.15	6.09663e-97	3	Rrm1
Timeless	7.22725e-100	2.50245	0.251	0.042	1.08055e-95	3	Timeless
Tuba1b	7.11034e-95	1.1693	0.864	0.615	1.06307e-90	3	Tuba1b
Mif	1.12314e-94	1.02413	0.921	0.734	1.6792e-90	3	Mif
Dtymk	6.24071e-94	1.56363	0.582	0.235	9.33048e-90	3	Dtymk
Nap1l1	2.28539e-92	0.951784	0.913	0.668	3.41689e-88	3	Nap1l1
Rpa2	7.38069e-92	1.82554	0.418	0.125	1.10349e-87	3	Rpa2
Nme1	2.08985e-89	1.20861	0.802	0.479	3.12454e-85	3	Nme1
Chaf1a	4.71459e-89	2.33389	0.274	0.057	7.04879e-85	3	Chaf1a
Ranbp1	1.46211e-86	1.29227	0.716	0.383	2.186e-82	3	Ranbp1
Hsp90aa1	3.26114e-85	0.861927	0.958	0.822	4.87574e-81	3	Hsp90aa1
Pold1	1.21122e-82	1.73638	0.388	0.117	1.8109e-78	3	Pold1
Atad2	2.48043e-82	1.79151	0.374	0.11	3.70849e-78	3	Atad2
Syce2	1.22666e-81	1.7841	0.426	0.143	1.83398e-77	3	Syce2
Fam111a	3.85629e-80	1.57507	0.472	0.171	5.76554e-76	3	Fam111a
Siva1	4.44615e-80	1.44823	0.589	0.267	6.64744e-76	3	Siva1
Pa2g4	9.61398e-79	1.11982	0.746	0.41	1.43739e-74	3	Pa2g4
Atpif1	1.02743e-77	0.832121	0.929	0.781	1.5361e-73	3	Atpif1
Eif5a	7.32031e-77	0.771402	0.949	0.825	1.09446e-72	3	Eif5a
Slbp	3.08238e-75	1.52682	0.472	0.178	4.60846e-71	3	Slbp
Set	1.63048e-74	0.910132	0.872	0.626	2.43774e-70	3	Set
Ybx1	1.80217e-74	0.954904	0.866	0.635	2.69442e-70	3	Ybx1
Runx3	5.30741e-73	1.98366	0.283	0.072	7.9351e-69	3	Runx3
Dek	5.22832e-72	1.04502	0.74	0.419	7.81687e-68	3	Dek
Tk1	5.32177e-72	1.91046	0.267	0.064	7.95658e-68	3	Tk1
Zfp367	1.03288e-71	1.83151	0.336	0.1	1.54425e-67	3	Zfp367
Paics	1.182e-71	1.19995	0.683	0.37	1.76721e-67	3	Paics
Pf4	1.49943e-70	2.94893	0.531	0.257	2.24179e-66	3	Pf4
Hnrnpf	2.22063e-70	0.887364	0.86	0.594	3.32006e-66	3	Hnrnpf
Hnrnpab	2.66315e-70	0.923782	0.841	0.588	3.98167e-66	3	Hnrnpab
Cdk4	2.85689e-70	1.06943	0.753	0.457	4.27134e-66	3	Cdk4
Fabp5	6.85843e-70	1.54598	0.433	0.16	1.0254e-65	3	Fabp5
Cdk6	5.58084e-69	1.21661	0.652	0.341	8.34391e-65	3	Cdk6
Snrpf	9.32456e-67	0.768675	0.918	0.711	1.39412e-62	3	Snrpf
Cox7c	1.63506e-66	0.675688	0.964	0.857	2.44458e-62	3	Cox7c
Cycs	1.73311e-66	1.26108	0.569	0.268	2.59117e-62	3	Cycs
Txn1	2.465e-65	0.80906	0.912	0.738	3.68542e-61	3	Txn1
Fen1	1.66317e-64	1.74912	0.303	0.089	2.4866e-60	3	Fen1
Lmnb1	1.87533e-64	1.34223	0.442	0.169	2.8038e-60	3	Lmnb1
Atp5g1	6.999e-64	0.965032	0.766	0.48	1.04642e-59	3	Atp5g1
Rps27l	2.86336e-63	0.852869	0.873	0.625	4.281e-59	3	Rps27l
Tfdp1	2.94403e-63	1.34105	0.482	0.203	4.40161e-59	3	Tfdp1
Hmgb2	4.22965e-63	0.512125	0.726	0.395	6.32375e-59	3	Hmgb2
Etfb	5.56123e-63	1.00959	0.776	0.511	8.31459e-59	3	Etfb
Crip1	2.09166e-62	1.07763	0.714	0.432	3.12724e-58	3	Crip1
Umps	2.25204e-62	1.54925	0.369	0.129	3.36703e-58	3	Umps
Usp1	3.88207e-62	1.428	0.446	0.181	5.80409e-58	3	Usp1
Pola1	1.13016e-61	1.43839	0.381	0.135	1.68971e-57	3	Pola1
Pola2	1.74444e-61	1.75429	0.29	0.085	2.60811e-57	3	Pola2
Rfc2	2.36044e-61	1.37879	0.515	0.242	3.52909e-57	3	Rfc2
Nop56	8.00516e-61	1.03696	0.693	0.393	1.19685e-56	3	Nop56
Hnrnpa3	1.46781e-60	0.828814	0.867	0.651	2.19453e-56	3	Hnrnpa3
Calm1	1.73257e-60	0.799291	0.877	0.69	2.59037e-56	3	Calm1
Hint1	6.47696e-60	0.869953	0.82	0.594	9.6837e-56	3	Hint1
Srm	1.74958e-59	1.42862	0.439	0.181	2.61579e-55	3	Srm
Hspd1	1.96806e-58	0.981476	0.716	0.435	2.94244e-54	3	Hspd1
Cbx3	1.15974e-57	0.947537	0.776	0.527	1.73393e-53	3	Cbx3
Adgrl1	1.20551e-57	1.85684	0.253	0.07	1.80236e-53	3	Adgrl1
Srsf2	1.77721e-57	0.866641	0.775	0.506	2.6571e-53	3	Srsf2
Ndufb1-ps	3.72923e-57	0.824755	0.82	0.558	5.57557e-53	3	Ndufb1-ps
Orc6	3.92241e-57	1.69879	0.3	0.096	5.86439e-53	3	Orc6
Dnajc9	8.87329e-57	1.31896	0.434	0.179	1.32665e-52	3	Dnajc9
Rfc4	1.1945e-56	1.79565	0.254	0.071	1.7859e-52	3	Rfc4
Topbp1	1.39294e-56	1.37974	0.413	0.166	2.08259e-52	3	Topbp1
Srsf3	8.44067e-55	0.819146	0.817	0.572	1.26196e-50	3	Srsf3
Cox6c	1.48104e-54	0.677648	0.913	0.771	2.2143e-50	3	Cox6c
Atp5k	1.85253e-54	0.824357	0.815	0.575	2.76971e-50	3	Atp5k
Hat1	1.88093e-54	1.41972	0.398	0.16	2.81217e-50	3	Hat1
Rpa1	9.93511e-54	1.27591	0.443	0.191	1.4854e-49	3	Rpa1
Ldha	1.26875e-53	0.684103	0.921	0.772	1.89691e-49	3	Ldha
Cox5a	1.92639e-53	1.02807	0.652	0.379	2.88014e-49	3	Cox5a
Nop10	2.92469e-52	0.744572	0.882	0.697	4.37271e-48	3	Nop10
AI506816	5.56835e-52	1.70238	0.266	0.083	8.32523e-48	3	AI506816
Nhp2	9.71582e-52	1.06774	0.6	0.328	1.45261e-47	3	Nhp2
Uqcc2	1.04326e-51	1.03507	0.623	0.354	1.55978e-47	3	Uqcc2
Dynll1	2.25445e-51	1.0004	0.642	0.365	3.37063e-47	3	Dynll1
Higd1a	3.33798e-50	1.32075	0.453	0.211	4.99061e-46	3	Higd1a
Snrpb	6.75041e-50	0.856908	0.759	0.519	1.00925e-45	3	Snrpb
Snrpd2	2.15868e-49	0.750756	0.835	0.599	3.22744e-45	3	Snrpd2
Atp5md	3.87492e-49	0.807576	0.801	0.582	5.7934e-45	3	Atp5md
Nme2	4.65144e-49	0.724536	0.869	0.662	6.95437e-45	3	Nme2
Banf1	5.69487e-49	0.998157	0.658	0.413	8.51439e-45	3	Banf1
Ybx3	7.28381e-49	0.896563	0.693	0.427	1.089e-44	3	Ybx3
Prdx1	1.02117e-48	0.717099	0.835	0.602	1.52675e-44	3	Prdx1
Hirip3	3.39532e-48	1.56902	0.283	0.096	5.07634e-44	3	Hirip3
Cks1b	5.98648e-48	1.21482	0.417	0.183	8.95038e-44	3	Cks1b
Snrpd1	1.28886e-47	0.968898	0.616	0.362	1.92698e-43	3	Snrpd1
Uqcr10	9.4284e-47	0.858341	0.737	0.502	1.40964e-42	3	Uqcr10
Cox6a1	1.91294e-46	0.710645	0.844	0.643	2.86004e-42	3	Cox6a1
Hnrnpu	2.87019e-46	0.600056	0.931	0.771	4.29122e-42	3	Hnrnpu
Micos10	2.8952e-46	0.792662	0.784	0.553	4.32861e-42	3	Micos10
Psma7	5.95767e-46	0.74931	0.798	0.581	8.90732e-42	3	Psma7
Ppil1	1.39228e-45	1.30444	0.362	0.149	2.0816e-41	3	Ppil1
Aarsd1	1.45837e-45	1.4448	0.294	0.106	2.18042e-41	3	Aarsd1
Msh6	2.31264e-45	1.24192	0.42	0.193	3.45762e-41	3	Msh6
Samd1	3.30258e-45	1.44433	0.312	0.117	4.93768e-41	3	Samd1
Atp5b	4.73147e-45	0.608936	0.913	0.781	7.07402e-41	3	Atp5b
Tmpo	8.66156e-45	0.953592	0.582	0.317	1.29499e-40	3	Tmpo
Hspe1	1.49289e-44	0.823361	0.768	0.545	2.23202e-40	3	Hspe1
Rpa3	1.77651e-44	1.35534	0.352	0.145	2.65606e-40	3	Rpa3
Nudc	7.49007e-44	0.966123	0.571	0.318	1.11984e-39	3	Nudc
Slc22a3	1.41271e-43	1.46963	0.277	0.098	2.11214e-39	3	Slc22a3
Casp8ap2	2.50946e-43	1.40071	0.273	0.095	3.75189e-39	3	Casp8ap2
Snrpd3	2.57393e-43	0.824577	0.719	0.474	3.84828e-39	3	Snrpd3
Nutf2-ps1	3.41199e-43	1.18344	0.43	0.204	5.10126e-39	3	Nutf2-ps1
Nup85	5.23678e-43	1.26774	0.384	0.169	7.82951e-39	3	Nup85
Lsm6	2.02042e-42	0.958321	0.521	0.27	3.02074e-38	3	Lsm6
Srsf7	3.55476e-42	0.812987	0.703	0.47	5.31471e-38	3	Srsf7
Atp5g3	3.69431e-42	0.702434	0.799	0.573	5.52336e-38	3	Atp5g3
Cox7b	5.03228e-42	0.703514	0.805	0.607	7.52376e-38	3	Cox7b
Nans	9.93186e-42	1.3291	0.328	0.133	1.48491e-37	3	Nans
Ezh2	1.06823e-41	1.30005	0.346	0.146	1.59712e-37	3	Ezh2
Timm8a1	1.52758e-41	1.3004	0.346	0.146	2.28389e-37	3	Timm8a1
Snu13	2.83395e-41	0.898185	0.635	0.396	4.23703e-37	3	Snu13
1810037I17Rik	9.10242e-41	0.792079	0.678	0.432	1.3609e-36	3	1810037I17Rik
Ptges3	1.43852e-40	0.768881	0.74	0.508	2.15074e-36	3	Ptges3
Gpx4	2.15581e-40	0.650524	0.835	0.659	3.22316e-36	3	Gpx4
Ywhaq	2.18645e-40	0.826086	0.672	0.437	3.26897e-36	3	Ywhaq
Top2a	2.61315e-40	0.809572	0.343	0.139	3.90693e-36	3	Top2a
Cbx5	2.69662e-40	0.991674	0.508	0.271	4.03171e-36	3	Cbx5
Cacybp	3.57973e-40	1.04237	0.499	0.264	5.35205e-36	3	Cacybp
Pold2	3.91261e-40	1.41138	0.296	0.115	5.84974e-36	3	Pold2
Sumo2	6.14435e-40	0.699861	0.763	0.536	9.18641e-36	3	Sumo2
Ndufa4	9.44915e-40	0.621501	0.887	0.743	1.41274e-35	3	Ndufa4
Rnaseh2b	1.2399e-39	1.46898	0.255	0.091	1.85377e-35	3	Rnaseh2b
Cfl1	2.57637e-39	0.580018	0.882	0.745	3.85193e-35	3	Cfl1
G3bp1	2.64481e-39	0.717473	0.768	0.546	3.95426e-35	3	G3bp1
Cox7a2	2.80032e-39	0.744204	0.742	0.516	4.18676e-35	3	Cox7a2
Ppm1g	3.8937e-39	1.09869	0.405	0.19	5.82147e-35	3	Ppm1g
Tpi1	4.77875e-39	0.816364	0.681	0.468	7.1447e-35	3	Tpi1
Cox5b	4.94617e-39	0.822812	0.685	0.457	7.39502e-35	3	Cox5b
Fbl	6.9358e-39	0.831317	0.623	0.384	1.03697e-34	3	Fbl
Atp5j2	1.74662e-38	0.630249	0.846	0.672	2.61137e-34	3	Atp5j2
Raly	2.99321e-38	0.95821	0.527	0.295	4.47516e-34	3	Raly
Odc1	3.12767e-38	0.898735	0.534	0.294	4.67618e-34	3	Odc1
Atp5e	3.40933e-38	0.622572	0.848	0.651	5.09729e-34	3	Atp5e
Rbl1	3.90212e-38	1.38063	0.268	0.101	5.83407e-34	3	Rbl1
Ndufa3	4.02129e-38	0.718558	0.775	0.569	6.01223e-34	3	Ndufa3
Hnrnpd	9.33495e-38	0.837067	0.616	0.38	1.39567e-33	3	Hnrnpd
Abracl	1.32968e-37	0.916683	0.558	0.329	1.98801e-33	3	Abracl
Ppp1ca	5.53797e-37	0.712033	0.732	0.496	8.27982e-33	3	Ppp1ca
Ak2	2.76504e-36	0.860323	0.569	0.34	4.13402e-32	3	Ak2
Gapdh	6.1282e-36	0.65616	0.825	0.655	9.16228e-32	3	Gapdh
Rbm3	8.0894e-36	0.705491	0.724	0.505	1.20945e-31	3	Rbm3
Rfc3	8.90989e-36	1.26299	0.316	0.136	1.33212e-31	3	Rfc3
Oxct1	1.08127e-35	1.02095	0.431	0.219	1.61661e-31	3	Oxct1
Uqcrq	1.19684e-35	0.819	0.638	0.417	1.78939e-31	3	Uqcrq
Actg1	1.30229e-35	0.557032	0.9	0.771	1.94705e-31	3	Actg1
Ipo5	2.35763e-35	1.02069	0.485	0.268	3.5249e-31	3	Ipo5
Rap1b	3.66605e-35	1.33048	0.631	0.483	5.48111e-31	3	Rap1b
Rfc5	4.89943e-35	1.33015	0.277	0.112	7.32514e-31	3	Rfc5
Pdcd4	5.04846e-35	1.27142	0.566	0.369	7.54796e-31	3	Pdcd4
Tubb5	5.88767e-35	0.682737	0.782	0.632	8.80266e-31	3	Tubb5
Chchd2	6.01966e-35	0.653036	0.823	0.624	9e-31	3	Chchd2
Atp5mpl	6.19221e-35	0.600756	0.856	0.693	9.25797e-31	3	Atp5mpl
Spcs3	9.62813e-35	1.05722	0.398	0.197	1.4395e-30	3	Spcs3
Slc16a1	1.24902e-34	1.24392	0.297	0.125	1.86741e-30	3	Slc16a1
Dnph1	1.57334e-34	1.40759	0.26	0.102	2.35231e-30	3	Dnph1
Jpt2	1.64638e-34	1.32607	0.266	0.105	2.4615e-30	3	Jpt2
Tgfb1	1.69903e-34	1.36472	0.276	0.112	2.54022e-30	3	Tgfb1
Cisd1	1.83978e-34	1.14963	0.358	0.168	2.75066e-30	3	Cisd1
Hmgb3	3.14135e-34	0.963156	0.469	0.252	4.69663e-30	3	Hmgb3
Anp32b	3.6482e-34	0.712144	0.691	0.468	5.45442e-30	3	Anp32b
Atp5j	5.11309e-34	0.616332	0.798	0.622	7.64458e-30	3	Atp5j
Mthfd1	5.46801e-34	1.01661	0.392	0.192	8.17522e-30	3	Mthfd1
C1galt1	6.1428e-34	1.45613	0.281	0.118	9.1841e-30	3	C1galt1
Gm7324	8.02603e-34	1.15592	0.341	0.157	1.19997e-29	3	Gm7324
Mlec	8.912e-34	0.909156	0.544	0.322	1.33243e-29	3	Mlec
Mrpl42	9.23482e-34	0.889888	0.522	0.304	1.3807e-29	3	Mrpl42
Ssrp1	9.66158e-34	0.720967	0.658	0.429	1.4445e-29	3	Ssrp1
Cad	1.09609e-33	1.18663	0.312	0.136	1.63876e-29	3	Cad
Pmf1	2.96687e-33	1.32514	0.263	0.106	4.43577e-29	3	Pmf1
Timm13	4.71784e-33	0.802945	0.597	0.373	7.05364e-29	3	Timm13
Dpy30	5.47272e-33	0.932617	0.469	0.26	8.18226e-29	3	Dpy30
Hdgf	7.18768e-33	0.732181	0.675	0.452	1.07463e-28	3	Hdgf
Eif4a1	8.24825e-33	0.550196	0.857	0.674	1.2332e-28	3	Eif4a1
Sec61b	1.04965e-32	0.576519	0.825	0.645	1.56933e-28	3	Sec61b
Pgp	1.55166e-32	1.23654	0.281	0.118	2.31989e-28	3	Pgp
Rbmxl1	2.29585e-32	0.956788	0.416	0.214	3.43252e-28	3	Rbmxl1
Oaz1	4.05224e-32	0.577443	0.85	0.688	6.05851e-28	3	Oaz1
Mcmbp	4.64148e-32	1.085	0.351	0.166	6.93948e-28	3	Mcmbp
Msh2	5.45235e-32	1.02338	0.405	0.209	8.15181e-28	3	Msh2
Ints7	6.60304e-32	1.10089	0.323	0.147	9.87221e-28	3	Ints7
Snrpg	9.66132e-32	0.49822	0.905	0.78	1.44446e-27	3	Snrpg
Aqp1	1.01607e-31	1.01832	0.281	0.118	1.51912e-27	3	Aqp1
Gart	1.12211e-31	0.925972	0.465	0.258	1.67767e-27	3	Gart
Cox6b1	1.20199e-31	0.597074	0.794	0.614	1.79709e-27	3	Cox6b1
Lgals9	1.84064e-31	0.778766	0.579	0.362	2.75194e-27	3	Lgals9
Tmem14c	4.36278e-31	0.775389	0.478	0.264	6.52279e-27	3	Tmem14c
Gm12184	5.11831e-31	1.20955	0.291	0.128	7.65238e-27	3	Gm12184
Ppat	5.45252e-31	1.12431	0.329	0.154	8.15206e-27	3	Ppat
AI662270	6.88118e-31	0.984343	0.381	0.19	1.02881e-26	3	AI662270
Hsp90b1	7.8455e-31	0.79258	0.73	0.551	1.17298e-26	3	Hsp90b1
Prmt1	1.34226e-30	0.848966	0.54	0.331	2.00682e-26	3	Prmt1
Ndufab1	1.4177e-30	0.849933	0.518	0.311	2.1196e-26	3	Ndufab1
Tardbp	1.61658e-30	0.7131	0.642	0.427	2.41694e-26	3	Tardbp
Srsf1	1.70331e-30	0.76843	0.616	0.412	2.54662e-26	3	Srsf1
Nop58	2.08053e-30	0.714272	0.616	0.392	3.1106e-26	3	Nop58
Psat1	5.43116e-30	1.12035	0.316	0.147	8.12013e-26	3	Psat1
Kpnb1	7.0288e-30	0.810202	0.54	0.332	1.05088e-25	3	Kpnb1
Atp5f1	8.33624e-30	0.688811	0.7	0.495	1.24635e-25	3	Atp5f1
Sem1	9.62101e-30	0.510971	0.877	0.77	1.43844e-25	3	Sem1
Rbbp4	9.6783e-30	0.707717	0.597	0.377	1.447e-25	3	Rbbp4
Lsm2	1.21803e-29	1.0199	0.39	0.205	1.82108e-25	3	Lsm2
Hmgn2	1.83486e-29	0.361403	0.73	0.531	2.7433e-25	3	Hmgn2
Magoh	1.92698e-29	0.791202	0.528	0.32	2.88102e-25	3	Magoh
Galk1	2.35542e-29	1.06632	0.356	0.181	3.52159e-25	3	Galk1
Cdk2	3.54548e-29	1.10964	0.299	0.136	5.30084e-25	3	Cdk2
Nolc1	4.88142e-29	0.892784	0.417	0.222	7.29821e-25	3	Nolc1
Nudt5	8.19378e-29	1.26786	0.25	0.105	1.22505e-24	3	Nudt5
Nup62	1.19457e-28	1.20955	0.277	0.124	1.786e-24	3	Nup62
Hspa14	2.22379e-28	0.970221	0.348	0.172	3.32478e-24	3	Hspa14
Usp37	2.96494e-28	1.19771	0.25	0.105	4.43288e-24	3	Usp37
Ubr7	3.3734e-28	1.15824	0.268	0.118	5.04358e-24	3	Ubr7
Gnl3	4.87834e-28	0.770461	0.54	0.331	7.2936e-24	3	Gnl3
Fmc1	6.13036e-28	0.753513	0.557	0.35	9.16551e-24	3	Fmc1
Cdk2ap1	8.41962e-28	0.969044	0.378	0.199	1.25882e-23	3	Cdk2ap1
Mrpl12	8.77407e-28	0.894393	0.434	0.244	1.31181e-23	3	Mrpl12
Mdh2	1.95355e-27	0.721962	0.573	0.363	2.92076e-23	3	Mdh2
Fkbp5	2.09435e-27	0.986323	0.356	0.183	3.13126e-23	3	Fkbp5
Rpn1	4.81798e-27	0.852885	0.488	0.3	7.20336e-23	3	Rpn1
Rab27b	6.20764e-27	1.22329	0.268	0.122	9.28104e-23	3	Rab27b
Hmga1b	7.90885e-27	0.981639	0.427	0.249	1.18245e-22	3	Hmga1b
Timm50	8.12445e-27	1.17711	0.268	0.122	1.21469e-22	3	Timm50
Ndufb2	8.41044e-27	0.669197	0.649	0.459	1.25744e-22	3	Ndufb2
Usp39	8.96388e-27	1.07264	0.284	0.131	1.34019e-22	3	Usp39
Uqcrb	9.13947e-27	0.629397	0.729	0.541	1.36644e-22	3	Uqcrb
Ndufa1	1.15482e-26	0.673163	0.599	0.393	1.72656e-22	3	Ndufa1
Cct3	1.88562e-26	0.671773	0.616	0.417	2.81918e-22	3	Cct3
C1qbp	2.75899e-26	0.786621	0.509	0.317	4.12497e-22	3	C1qbp
Arpp19	3.13067e-26	0.707116	0.576	0.386	4.68067e-22	3	Arpp19
Smc6	4.1875e-26	0.916444	0.385	0.208	6.26074e-22	3	Smc6
Rcc1	4.58513e-26	1.12811	0.278	0.13	6.85523e-22	3	Rcc1
Parp1	4.99452e-26	0.926187	0.395	0.219	7.46731e-22	3	Parp1
Lsm7	9.32137e-26	0.667688	0.619	0.424	1.39364e-21	3	Lsm7
Ywhah	1.15296e-25	0.709069	0.54	0.341	1.72378e-21	3	Ywhah
Tkt	1.5759e-25	0.340974	0.823	0.63	2.35613e-21	3	Tkt
Naa50	1.76656e-25	0.782095	0.475	0.288	2.64118e-21	3	Naa50
Lyar	2.01672e-25	0.959202	0.361	0.193	3.0152e-21	3	Lyar
Atp5h	2.3881e-25	0.549395	0.755	0.579	3.57045e-21	3	Atp5h
Erh	2.39027e-25	0.80416	0.481	0.291	3.57369e-21	3	Erh
Atic	2.73668e-25	0.802572	0.456	0.269	4.09161e-21	3	Atic
Tomm7	2.80315e-25	0.486244	0.81	0.657	4.19099e-21	3	Tomm7
Pgk1	2.8106e-25	0.676796	0.622	0.425	4.20213e-21	3	Pgk1
Ndufb8	3.0821e-25	0.65424	0.625	0.439	4.60804e-21	3	Ndufb8
Tssc4	5.18694e-25	1.03587	0.306	0.152	7.75499e-21	3	Tssc4
Idh2	5.4599e-25	0.850358	0.449	0.268	8.1631e-21	3	Idh2
Psip1	6.12403e-25	0.770693	0.498	0.311	9.15604e-21	3	Psip1
Uqcr11	6.80097e-25	0.511927	0.792	0.63	1.01681e-20	3	Uqcr11
Chaf1b	8.01276e-25	1.02023	0.3	0.148	1.19799e-20	3	Chaf1b
Nsmce4a	8.13805e-25	1.00705	0.325	0.166	1.21672e-20	3	Nsmce4a
Map4k1	8.28011e-25	0.985505	0.348	0.185	1.23796e-20	3	Map4k1
Fkbp4	1.12862e-24	0.779317	0.481	0.296	1.6874e-20	3	Fkbp4
Mrpl40	1.38155e-24	1.05952	0.271	0.127	2.06556e-20	3	Mrpl40
Ndufc21	1.66577e-24	0.590154	0.651	0.458	2.49049e-20	3	Ndufc2
U2af1	2.03921e-24	0.707269	0.573	0.388	3.04882e-20	3	U2af1
Ppif	2.23937e-24	0.895084	0.372	0.203	3.34809e-20	3	Ppif
Mrpl18	2.33099e-24	0.960041	0.362	0.197	3.48506e-20	3	Mrpl18
Cetn3	2.47854e-24	0.766165	0.517	0.329	3.70567e-20	3	Cetn3
Polr3k	3.2932e-24	1.00063	0.316	0.161	4.92366e-20	3	Polr3k
Dpm31	4.07011e-24	0.682211	0.623	0.438	6.08522e-20	3	Dpm3
Ppih	4.18244e-24	1.01551	0.277	0.132	6.25317e-20	3	Ppih
Bzw2	4.41008e-24	0.822844	0.462	0.282	6.59351e-20	3	Bzw2
Plek	4.9916e-24	1.21182	0.339	0.189	7.46294e-20	3	Plek
Nucks1	5.0127e-24	0.578787	0.61	0.417	7.49449e-20	3	Nucks1
Prps2	5.4661e-24	1.0373	0.253	0.115	8.17236e-20	3	Prps2
Ppp1r14b	5.58156e-24	0.842047	0.42	0.244	8.345e-20	3	Ppp1r14b
Lrrc59	5.7887e-24	0.883334	0.375	0.207	8.65469e-20	3	Lrrc59
Timm23	6.11999e-24	0.94216	0.368	0.204	9.15e-20	3	Timm23
Tmem147	7.1535e-24	0.943372	0.367	0.204	1.06952e-19	3	Tmem147
Atp1b3	1.29143e-23	0.897478	0.372	0.207	1.93081e-19	3	Atp1b3
Ivns1abp	1.33934e-23	0.702519	0.543	0.354	2.00245e-19	3	Ivns1abp
Mrpl33	1.74713e-23	0.643559	0.623	0.437	2.61214e-19	3	Mrpl33
Shmt2	1.99057e-23	0.978635	0.297	0.148	2.97611e-19	3	Shmt2
Cct7	2.20282e-23	0.585461	0.655	0.472	3.29344e-19	3	Cct7
Ddx21	2.28811e-23	0.72785	0.538	0.355	3.42096e-19	3	Ddx21
Rfc1	2.39686e-23	0.916918	0.397	0.231	3.58355e-19	3	Rfc1
Rbis1	2.42304e-23	0.732003	0.528	0.346	3.62269e-19	3	Rbis
Eif1ax	3.31515e-23	0.746919	0.46	0.279	4.95648e-19	3	Eif1ax
Alyref	3.91836e-23	0.774906	0.443	0.268	5.85834e-19	3	Alyref
Cenpw	3.93773e-23	1.05069	0.257	0.12	5.88729e-19	3	Cenpw
Sf3b5	4.20169e-23	0.70336	0.54	0.354	6.28194e-19	3	Sf3b5
Hpf1	4.52203e-23	0.89347	0.349	0.189	6.76089e-19	3	Hpf1
Mrpl14	4.64377e-23	0.811698	0.424	0.251	6.94291e-19	3	Mrpl14
Apex1	5.47705e-23	0.821756	0.398	0.227	8.18873e-19	3	Apex1
Syncrip	6.22139e-23	0.633771	0.524	0.333	9.3016e-19	3	Syncrip
Ubtf	6.8077e-23	0.66537	0.501	0.313	1.01782e-18	3	Ubtf
Atp5o	1.46137e-22	0.565691	0.638	0.459	2.18489e-18	3	Atp5o
Hprt	1.46799e-22	0.776043	0.465	0.287	2.19479e-18	3	Hprt
Cenpx	1.6334e-22	0.798109	0.405	0.234	2.4421e-18	3	Cenpx
Stip1	1.73159e-22	0.791182	0.417	0.247	2.5889e-18	3	Stip1
Rif1	1.74422e-22	0.841122	0.391	0.224	2.60779e-18	3	Rif1
Eloc	1.84538e-22	0.710685	0.46	0.282	2.75902e-18	3	Eloc
Nxt1	2.00561e-22	0.96484	0.283	0.14	2.99859e-18	3	Nxt1
Tuba4a	2.64976e-22	0.667772	0.531	0.353	3.96165e-18	3	Tuba4a
Baz1a	2.75425e-22	0.87266	0.26	0.122	4.11787e-18	3	Baz1a
Baz1b	2.92378e-22	0.777957	0.45	0.277	4.37134e-18	3	Baz1b
Gm47283	3.94158e-22	0.839132	0.358	0.198	5.89305e-18	3	Gm47283
Ddx39	4.29211e-22	0.894522	0.293	0.147	6.41713e-18	3	Ddx39
Exosc8	4.35458e-22	0.930376	0.326	0.175	6.51053e-18	3	Exosc8
Calr	4.58612e-22	0.50892	0.76	0.619	6.85671e-18	3	Calr
Rcc2	4.87054e-22	0.562937	0.662	0.495	7.28194e-18	3	Rcc2
Fasn	5.38565e-22	0.938386	0.316	0.167	8.05209e-18	3	Fasn
Mat2a	6.75537e-22	0.583013	0.654	0.47	1.01e-17	3	Mat2a
Tra2b	7.22332e-22	0.563522	0.684	0.511	1.07996e-17	3	Tra2b
Fkbp3	7.78543e-22	0.616963	0.566	0.382	1.164e-17	3	Fkbp3
Trim28	8.08834e-22	0.635934	0.571	0.394	1.20929e-17	3	Trim28
Ndufs6	9.74911e-22	0.714754	0.519	0.343	1.45759e-17	3	Ndufs6
Sae1	1.145e-21	0.762573	0.456	0.282	1.71189e-17	3	Sae1
Manf	1.22714e-21	0.843174	0.449	0.281	1.83469e-17	3	Manf
Slc14a1	1.70337e-21	1.21662	0.343	0.202	2.54671e-17	3	Slc14a1
Phf5a	1.90764e-21	0.85187	0.336	0.183	2.85211e-17	3	Phf5a
Xist	2.04663e-21	0.490876	0.466	0.272	3.05991e-17	3	Xist
Lsm3	2.68503e-21	0.753056	0.439	0.269	4.01439e-17	3	Lsm3
Uba2	2.71722e-21	0.929706	0.326	0.177	4.06252e-17	3	Uba2
Dbi1	3.5271e-21	0.654606	0.582	0.415	5.27337e-17	3	Dbi
Cct8	3.69825e-21	0.578741	0.636	0.456	5.52925e-17	3	Cct8
Srsf10	3.85579e-21	0.836192	0.374	0.215	5.76479e-17	3	Srsf10
Ndufb4	3.96087e-21	0.639244	0.576	0.394	5.9219e-17	3	Ndufb4
Psma2	4.56166e-21	0.584462	0.62	0.441	6.82014e-17	3	Psma2
Chchd1	4.89436e-21	0.735818	0.466	0.298	7.31756e-17	3	Chchd1
Eif1ad	5.95814e-21	0.982011	0.264	0.131	8.90802e-17	3	Eif1ad
Prdx4	5.99655e-21	0.853131	0.349	0.196	8.96544e-17	3	Prdx4
Tma7	6.91804e-21	0.505227	0.762	0.609	1.03432e-16	3	Tma7
Ndufb7	7.04575e-21	0.643942	0.577	0.411	1.05341e-16	3	Ndufb7
Ndufc1	7.13721e-21	0.647292	0.577	0.405	1.06708e-16	3	Ndufc1
Pdia3	7.39934e-21	0.601154	0.626	0.459	1.10628e-16	3	Pdia3
Hsph1	7.46744e-21	0.948258	0.276	0.14	1.11646e-16	3	Hsph1
Anp32a	7.59653e-21	0.611425	0.579	0.401	1.13576e-16	3	Anp32a
Gp9	7.6408e-21	0.94571	0.291	0.151	1.14238e-16	3	Gp9
Dnajc19	9.70232e-21	0.785126	0.388	0.227	1.45059e-16	3	Dnajc19
Pdia6	1.00885e-20	0.742125	0.519	0.35	1.50833e-16	3	Pdia6
Gps1	1.12535e-20	0.961062	0.268	0.134	1.68251e-16	3	Gps1
Supt16	1.31783e-20	0.710192	0.42	0.252	1.97029e-16	3	Supt16
Cct6a	1.55754e-20	0.526705	0.633	0.446	2.32868e-16	3	Cct6a
Vdac1	1.82043e-20	0.702138	0.46	0.291	2.72172e-16	3	Vdac1
Dtnbp1	1.88024e-20	0.80812	0.387	0.227	2.81115e-16	3	Dtnbp1
Thoc7	2.07624e-20	0.630121	0.512	0.335	3.10419e-16	3	Thoc7
Eif3b	2.27146e-20	0.669117	0.517	0.343	3.39607e-16	3	Eif3b
Psmb5	3.11922e-20	0.637987	0.53	0.358	4.66355e-16	3	Psmb5
Phgdh	3.38678e-20	0.668419	0.465	0.294	5.06357e-16	3	Phgdh
Cox6b2	3.89955e-20	0.905391	0.283	0.146	5.83022e-16	3	Cox6b2
Qdpr	3.90681e-20	0.840488	0.41	0.251	5.84108e-16	3	Qdpr
Atp5c1	4.50651e-20	0.492792	0.701	0.531	6.73768e-16	3	Atp5c1
Mrto4	4.91788e-20	0.992811	0.267	0.136	7.35273e-16	3	Mrto4
Nelfe	5.09456e-20	0.972699	0.253	0.125	7.61688e-16	3	Nelfe
Uchl3	5.74617e-20	0.92056	0.306	0.165	8.5911e-16	3	Uchl3
Pcbp1	6.2631e-20	0.465232	0.727	0.568	9.36396e-16	3	Pcbp1
Cd9	6.63375e-20	0.678533	0.563	0.409	9.91813e-16	3	Cd9
Ndufa12	7.17753e-20	0.574734	0.599	0.423	1.07311e-15	3	Ndufa12
Ptrh2	7.58965e-20	0.942823	0.274	0.141	1.13473e-15	3	Ptrh2
Tmem256	7.96823e-20	0.607241	0.595	0.431	1.19133e-15	3	Tmem256
Unc119	8.9329e-20	0.960619	0.306	0.167	1.33556e-15	3	Unc119
Anp32e	1.30976e-19	0.608486	0.494	0.32	1.95823e-15	3	Anp32e
Ipo9	1.53712e-19	0.916451	0.299	0.161	2.29815e-15	3	Ipo9
Lsm8	1.65062e-19	0.869011	0.335	0.19	2.46785e-15	3	Lsm8
Noc2l	1.74881e-19	0.707393	0.417	0.257	2.61464e-15	3	Noc2l
Dkc1	2.02183e-19	0.680634	0.459	0.297	3.02283e-15	3	Dkc1
Gspt1	2.24355e-19	0.712114	0.39	0.231	3.35434e-15	3	Gspt1
Ndufaf2	2.41936e-19	0.888371	0.319	0.177	3.61718e-15	3	Ndufaf2
Arrb2	2.49491e-19	0.899824	0.255	0.128	3.73013e-15	3	Arrb2
Psma6	2.49544e-19	0.575406	0.566	0.387	3.73093e-15	3	Psma6
Eif6	2.55542e-19	0.81058	0.352	0.204	3.82061e-15	3	Eif6
Sf3b6	2.7918e-19	0.524707	0.638	0.475	4.17402e-15	3	Sf3b6
Fh1	3.30232e-19	0.874278	0.339	0.196	4.9373e-15	3	Fh1
Rbbp7	4.00684e-19	0.640191	0.574	0.419	5.99063e-15	3	Rbbp7
Ebna1bp2	4.1572e-19	0.722606	0.436	0.275	6.21543e-15	3	Ebna1bp2
Elob	4.56359e-19	0.490407	0.755	0.62	6.82302e-15	3	Elob
Psmd13	5.33249e-19	0.613309	0.481	0.31	7.9726e-15	3	Psmd13
Psmc4	7.3911e-19	0.868667	0.356	0.214	1.10504e-14	3	Psmc4
Smc2	7.72637e-19	0.714263	0.306	0.164	1.15517e-14	3	Smc2
Sfxn1	8.258e-19	0.708172	0.44	0.281	1.23465e-14	3	Sfxn1
Cks2	1.05284e-18	0.466976	0.29	0.15	1.5741e-14	3	Cks2
Bola1	1.06808e-18	0.895029	0.316	0.178	1.59689e-14	3	Bola1
Snrpe	1.10145e-18	0.541552	0.654	0.502	1.64677e-14	3	Snrpe
Cse1l	1.36573e-18	0.791974	0.32	0.179	2.0419e-14	3	Cse1l
Exosc7	1.39045e-18	0.854387	0.329	0.189	2.07886e-14	3	Exosc7
F2r	1.84071e-18	1.18557	0.281	0.157	2.75204e-14	3	F2r
Pdap1	1.86877e-18	0.725663	0.404	0.25	2.79399e-14	3	Pdap1
Fkbp2	2.00382e-18	0.86587	0.307	0.171	2.99592e-14	3	Fkbp2
Usp501	2.17283e-18	0.641766	0.512	0.349	3.2486e-14	3	Usp50
Eif4a3	2.24412e-18	0.681916	0.431	0.275	3.35518e-14	3	Eif4a3
Hmgn1	2.31813e-18	0.578202	0.58	0.423	3.46584e-14	3	Hmgn1
Mydgf	2.5987e-18	0.805881	0.303	0.167	3.88532e-14	3	Mydgf
Tmed2	2.87311e-18	0.553555	0.548	0.373	4.29559e-14	3	Tmed2
Psma1	3.09066e-18	0.636819	0.496	0.337	4.62084e-14	3	Psma1
Mrpl20	3.17728e-18	0.784976	0.38	0.234	4.75036e-14	3	Mrpl20
Cnot9	3.47555e-18	0.954087	0.258	0.134	5.1963e-14	3	Cnot9
Ndufa2	5.05372e-18	0.466204	0.707	0.551	7.55582e-14	3	Ndufa2
Erg28	5.2443e-18	0.837463	0.313	0.177	7.84075e-14	3	Erg28
Mrpl13	5.25754e-18	0.703519	0.433	0.282	7.86055e-14	3	Mrpl13
Ptpn7	5.27544e-18	0.737324	0.359	0.213	7.88731e-14	3	Ptpn7
Nup50	5.31812e-18	0.849686	0.26	0.134	7.95112e-14	3	Nup50
Aars	5.68915e-18	0.909406	0.258	0.135	8.50586e-14	3	Aars
Alad	5.72729e-18	0.759743	0.264	0.136	8.56287e-14	3	Alad
Idh3a	6.51759e-18	0.745538	0.319	0.18	9.74445e-14	3	Idh3a
Ccnd1	9.13166e-18	0.747565	0.384	0.235	1.36527e-13	3	Ccnd1
Ciao2a	9.49743e-18	0.750385	0.397	0.249	1.41996e-13	3	Ciao2a
Psmb3	1.26636e-17	0.59858	0.553	0.392	1.89333e-13	3	Psmb3
Rabgap1l	1.72727e-17	0.815739	0.468	0.328	2.58244e-13	3	Rabgap1l
Eif4g1	1.83614e-17	0.592389	0.518	0.359	2.74522e-13	3	Eif4g1
Atp5g2	2.53001e-17	0.361417	0.853	0.715	3.78262e-13	3	Atp5g2
Mogs	2.60564e-17	0.809641	0.354	0.215	3.89569e-13	3	Mogs
Cntln	2.81333e-17	0.753023	0.307	0.173	4.20621e-13	3	Cntln
Snrpa1	3.45037e-17	0.912122	0.312	0.182	5.15865e-13	3	Snrpa1
Tpm3-rs7	3.5228e-17	0.66056	0.459	0.308	5.26694e-13	3	Tpm3-rs7
H2afj	4.5543e-17	0.615643	0.505	0.351	6.80913e-13	3	H2afj
Polr2f1	4.74084e-17	0.608218	0.501	0.344	7.08803e-13	3	Polr2f
Serf1	5.94836e-17	0.795575	0.323	0.188	8.89339e-13	3	Serf1
Mapk1	6.07064e-17	0.649144	0.495	0.343	9.07621e-13	3	Mapk1
Eny2	7.22338e-17	0.617952	0.443	0.287	1.07997e-12	3	Eny2
Hnrnpm	7.32248e-17	0.527616	0.583	0.432	1.09478e-12	3	Hnrnpm
Xpo1	7.44322e-17	0.774906	0.359	0.221	1.11284e-12	3	Xpo1
Exosc5	8.64366e-17	0.734152	0.367	0.226	1.29231e-12	3	Exosc5
Nt5c3b	8.98698e-17	0.862688	0.278	0.154	1.34364e-12	3	Nt5c3b
Cuta	9.14852e-17	0.670191	0.401	0.252	1.36779e-12	3	Cuta
Stub1	1.04702e-16	0.771924	0.359	0.222	1.5654e-12	3	Stub1
Mrps26	1.18246e-16	0.721779	0.306	0.173	1.76789e-12	3	Mrps26
H2afv	1.31987e-16	0.489674	0.564	0.397	1.97333e-12	3	H2afv
Gnas	1.47363e-16	0.359829	0.857	0.749	2.20323e-12	3	Gnas
Kars	1.49368e-16	0.644786	0.43	0.281	2.2332e-12	3	Kars
Hspa5	1.94133e-16	0.672608	0.645	0.516	2.90248e-12	3	Hspa5
Psma4	1.99573e-16	0.561038	0.544	0.384	2.98381e-12	3	Psma4
Pbdc1	2.47099e-16	0.775137	0.32	0.188	3.69438e-12	3	Pbdc1
Strap	2.47321e-16	0.645157	0.433	0.284	3.69769e-12	3	Strap
Fam162a	2.73334e-16	0.671389	0.407	0.262	4.08662e-12	3	Fam162a
Pebp11	2.78279e-16	0.415086	0.694	0.531	4.16055e-12	3	Pebp1
Ctla2a	3.50146e-16	0.425511	0.723	0.565	5.23504e-12	3	Ctla2a
Ppa1	3.67751e-16	0.6081	0.463	0.316	5.49824e-12	3	Ppa1
Pole4	3.70262e-16	0.691896	0.382	0.241	5.53579e-12	3	Pole4
Anapc5	3.73969e-16	0.567439	0.547	0.391	5.59121e-12	3	Anapc5
Sfpq	3.75762e-16	0.436783	0.709	0.556	5.61802e-12	3	Sfpq
Prpf19	5.02194e-16	0.660506	0.456	0.306	7.5083e-12	3	Prpf19
Fus	5.37394e-16	0.485174	0.684	0.534	8.03457e-12	3	Fus
Wdr5	5.44552e-16	0.762628	0.339	0.207	8.1416e-12	3	Wdr5
Gfi1b	6.1712e-16	0.757458	0.304	0.175	9.22657e-12	3	Gfi1b
Dynll2	6.78323e-16	0.711746	0.446	0.307	1.01416e-11	3	Dynll2
Tsen15	7.31016e-16	0.896955	0.266	0.148	1.09294e-11	3	Tsen15
Smarcb1	7.51298e-16	0.70833	0.332	0.199	1.12327e-11	3	Smarcb1
Uchl5	7.59139e-16	0.784965	0.343	0.213	1.13499e-11	3	Uchl5
Tomm51	9.29514e-16	0.537261	0.492	0.337	1.38972e-11	3	Tomm5
Uck2	1.03929e-15	0.665311	0.361	0.221	1.55384e-11	3	Uck2
Lage3	1.04125e-15	0.77663	0.323	0.194	1.55677e-11	3	Lage3
Tmsb10	1.19311e-15	0.397455	0.576	0.425	1.78381e-11	3	Tmsb10
Pcbd2	1.29529e-15	0.826804	0.254	0.138	1.93659e-11	3	Pcbd2
Pomp1	1.39567e-15	0.494811	0.625	0.479	2.08667e-11	3	Pomp
Ssr1	1.6458e-15	0.57113	0.489	0.341	2.46064e-11	3	Ssr1
Cdca7l	1.66104e-15	0.721833	0.333	0.201	2.48343e-11	3	Cdca7l
Eif3g	1.70838e-15	0.607047	0.437	0.293	2.55419e-11	3	Eif3g
Gtf3a	1.75586e-15	0.835382	0.339	0.211	2.62518e-11	3	Gtf3a
Actl6a	1.84084e-15	0.829996	0.251	0.136	2.75224e-11	3	Actl6a
Pgls	1.89478e-15	0.565935	0.481	0.334	2.83289e-11	3	Pgls
Haus4	2.08103e-15	0.905134	0.253	0.139	3.11135e-11	3	Haus4
Smc3	2.20974e-15	0.643218	0.433	0.29	3.30379e-11	3	Smc3
Ostc	2.32853e-15	0.617771	0.405	0.264	3.48139e-11	3	Ostc
Abce1	2.47143e-15	0.634909	0.414	0.269	3.69503e-11	3	Abce1
Tmem2581	2.6943e-15	0.489058	0.638	0.481	4.02825e-11	3	Tmem258
Nono	2.7446e-15	0.563084	0.537	0.392	4.10345e-11	3	Nono
Dnaja1	2.96565e-15	0.546667	0.589	0.449	4.43394e-11	3	Dnaja1
Dctd	3.04862e-15	0.78307	0.266	0.148	4.558e-11	3	Dctd
Ube2k	3.65873e-15	0.597096	0.41	0.264	5.47017e-11	3	Ube2k
Nrgn	3.74259e-15	0.467988	0.649	0.509	5.59555e-11	3	Nrgn
Bola21	3.80214e-15	0.445396	0.671	0.524	5.68458e-11	3	Bola2
Tbcb	4.19011e-15	0.819208	0.333	0.21	6.26463e-11	3	Tbcb
Sod1	4.45124e-15	0.43974	0.814	0.711	6.65505e-11	3	Sod1
Ddx1	4.67322e-15	0.748251	0.322	0.194	6.98693e-11	3	Ddx1
Vamp5	5.50486e-15	0.473631	0.684	0.561	8.23031e-11	3	Vamp5
Sms	5.5652e-15	0.71843	0.293	0.17	8.32053e-11	3	Sms
Rrp15	5.79465e-15	0.783058	0.283	0.163	8.66359e-11	3	Rrp15
Kpna3	6.02211e-15	0.789914	0.26	0.145	9.00366e-11	3	Kpna3
Impdh2	6.73446e-15	0.352156	0.786	0.638	1.00687e-10	3	Impdh2
Cdc123	7.22657e-15	0.68875	0.339	0.209	1.08044e-10	3	Cdc123
Amd1	7.27661e-15	0.711924	0.38	0.244	1.08793e-10	3	Amd1
Cox17	7.35634e-15	0.426673	0.609	0.456	1.09985e-10	3	Cox17
Eif4e	7.54585e-15	0.647954	0.38	0.243	1.12818e-10	3	Eif4e
Psme3	7.62018e-15	0.728195	0.33	0.202	1.13929e-10	3	Psme3
Psmb4	9.00822e-15	0.475037	0.658	0.51	1.34682e-10	3	Psmb4
Snrpc	9.35538e-15	0.650693	0.377	0.242	1.39872e-10	3	Snrpc
Zfp422	1.17802e-14	0.836934	0.28	0.163	1.76126e-10	3	Zfp422
Romo1	1.18775e-14	0.468911	0.623	0.468	1.77581e-10	3	Romo1
Sumo3	1.35386e-14	0.630529	0.449	0.311	2.02416e-10	3	Sumo3
Swi5	1.40296e-14	0.445838	0.644	0.501	2.09756e-10	3	Swi5
Ddx39b	1.72516e-14	0.446861	0.6	0.449	2.57929e-10	3	Ddx39b
Lims1	1.82639e-14	0.78177	0.377	0.253	2.73064e-10	3	Lims1
Pdcd5	1.93642e-14	0.705562	0.408	0.28	2.89513e-10	3	Pdcd5
2310039H08Rik	2.12448e-14	0.805013	0.274	0.159	3.17631e-10	3	2310039H08Rik
Snrnp40	2.24944e-14	0.715848	0.273	0.156	3.36314e-10	3	Snrnp40
Atad3a	2.26379e-14	0.704848	0.309	0.185	3.3846e-10	3	Atad3a
Gm4737	2.36343e-14	0.831083	0.253	0.142	3.53357e-10	3	Gm4737
Hnrnpa0	2.41368e-14	0.377594	0.745	0.603	3.60869e-10	3	Hnrnpa0
Dhx9	2.5234e-14	0.635336	0.408	0.273	3.77273e-10	3	Dhx9
Ptprs	2.56468e-14	0.599031	0.351	0.217	3.83446e-10	3	Ptprs
Psme2	2.8953e-14	0.507133	0.489	0.34	4.32876e-10	3	Psme2
Krtcap2	3.24657e-14	0.426657	0.623	0.473	4.85395e-10	3	Krtcap2
Gmps	3.79246e-14	0.713127	0.303	0.182	5.67011e-10	3	Gmps
Galnt1	3.87339e-14	0.623297	0.423	0.289	5.79111e-10	3	Galnt1
Tomm6	3.90848e-14	0.45148	0.616	0.472	5.84356e-10	3	Tomm6
Myc	4.15718e-14	0.486055	0.472	0.321	6.2154e-10	3	Myc
Rnaseh2a	4.42399e-14	0.773786	0.255	0.144	6.61431e-10	3	Rnaseh2a
Bzw1	4.85074e-14	0.522702	0.485	0.341	7.25235e-10	3	Bzw1
Pole3	4.89283e-14	0.743438	0.277	0.161	7.31528e-10	3	Pole3
Rexo2	4.90058e-14	0.63159	0.345	0.216	7.32685e-10	3	Rexo2
Ndufb6	5.26525e-14	0.564036	0.401	0.262	7.87207e-10	3	Ndufb6
Impa2	5.39835e-14	0.68468	0.299	0.178	8.07108e-10	3	Impa2
Aldh9a1	5.84563e-14	0.752052	0.274	0.16	8.7398e-10	3	Aldh9a1
Ndufv2	5.893e-14	0.553566	0.453	0.316	8.81062e-10	3	Ndufv2
Psmg2	6.50512e-14	0.770337	0.254	0.144	9.7258e-10	3	Psmg2
Ssr2	6.7291e-14	0.604336	0.42	0.282	1.00607e-09	3	Ssr2
Pfdn6	6.78043e-14	0.689435	0.358	0.229	1.01374e-09	3	Pfdn6
Ahsa1	7.02553e-14	0.57405	0.397	0.261	1.05039e-09	3	Ahsa1
Hnrnpl	7.18285e-14	0.431196	0.595	0.449	1.07391e-09	3	Hnrnpl
Bex3	7.83526e-14	0.590841	0.47	0.334	1.17145e-09	3	Bex3
Hnrnpdl	7.99082e-14	0.470037	0.515	0.369	1.19471e-09	3	Hnrnpdl
Rbm10	8.02212e-14	0.705545	0.297	0.178	1.19939e-09	3	Rbm10
Tcp1	9.14882e-14	0.446498	0.561	0.411	1.36784e-09	3	Tcp1
Eif3a	1.00968e-13	0.444108	0.6	0.461	1.50957e-09	3	Eif3a
Prdx3	1.01993e-13	0.623545	0.345	0.218	1.5249e-09	3	Prdx3
Tufm	1.20517e-13	0.716981	0.291	0.174	1.80186e-09	3	Tufm
Ppid	1.21342e-13	0.653981	0.372	0.243	1.81419e-09	3	Ppid
Rasgrp2	1.36918e-13	0.674003	0.329	0.206	2.04706e-09	3	Rasgrp2
Gars	1.38588e-13	0.632551	0.325	0.2	2.07203e-09	3	Gars
Lap3	1.4229e-13	0.696197	0.281	0.166	2.12737e-09	3	Lap3
E2f4	1.82876e-13	0.741153	0.271	0.159	2.73418e-09	3	E2f4
Ubap2	1.97836e-13	0.76924	0.266	0.156	2.95785e-09	3	Ubap2
Ywhab	2.1667e-13	0.415576	0.69	0.561	3.23943e-09	3	Ywhab
Vrk1	2.29135e-13	0.76924	0.263	0.154	3.42579e-09	3	Vrk1
Ap1s1	2.48306e-13	0.64894	0.367	0.239	3.71243e-09	3	Ap1s1
Nup210	2.61588e-13	0.532289	0.427	0.29	3.911e-09	3	Nup210
Got2	2.68986e-13	0.607045	0.424	0.292	4.02161e-09	3	Got2
Ndufa5	2.71353e-13	0.544051	0.532	0.396	4.05699e-09	3	Ndufa5
Ipo7	2.87189e-13	0.639506	0.364	0.238	4.29376e-09	3	Ipo7
Eif2s1	2.94193e-13	0.685558	0.341	0.218	4.39847e-09	3	Eif2s1
Kdelr2	3.4243e-13	0.647151	0.335	0.212	5.11967e-09	3	Kdelr2
Canx	3.44966e-13	0.323517	0.769	0.638	5.15758e-09	3	Canx
Ifrd2	3.5783e-13	0.680246	0.271	0.159	5.34991e-09	3	Ifrd2
Rbm8a	3.80536e-13	0.459268	0.557	0.416	5.6894e-09	3	Rbm8a
Xrcc6	4.17659e-13	0.716104	0.267	0.156	6.24442e-09	3	Xrcc6
Srpk1	4.39141e-13	0.602384	0.384	0.257	6.5656e-09	3	Srpk1
Slc1a5	5.22223e-13	0.6617	0.293	0.177	7.80775e-09	3	Slc1a5
Mtch2	5.64709e-13	0.641305	0.343	0.222	8.44296e-09	3	Mtch2
Csrp1	5.6526e-13	0.746418	0.257	0.15	8.4512e-09	3	Csrp1
Elof1	6.19859e-13	0.783616	0.261	0.155	9.26751e-09	3	Elof1
Ssr41	6.29376e-13	0.488605	0.587	0.455	9.40981e-09	3	Ssr4
Sarnp	6.3479e-13	0.47695	0.556	0.415	9.49075e-09	3	Sarnp
Hdac2	6.96555e-13	0.6307	0.354	0.231	1.04142e-08	3	Hdac2
Thyn1	9.73143e-13	0.741285	0.254	0.148	1.45495e-08	3	Thyn1
Hspa9	1.09872e-12	0.458992	0.567	0.433	1.64269e-08	3	Hspa9
Cbfb	1.17412e-12	0.570325	0.384	0.256	1.75543e-08	3	Cbfb
Srsf6	1.36292e-12	0.434773	0.567	0.431	2.0377e-08	3	Srsf6
Cltb	1.3755e-12	0.697402	0.277	0.168	2.05651e-08	3	Cltb
Jpt1	1.67423e-12	0.523676	0.338	0.214	2.50314e-08	3	Jpt1
Eri1	1.69211e-12	0.71904	0.257	0.151	2.52988e-08	3	Eri1
Trim27	1.79601e-12	0.599915	0.342	0.222	2.68521e-08	3	Trim27
Smarca5	1.8351e-12	0.567697	0.468	0.342	2.74366e-08	3	Smarca5
Ndufb91	1.85861e-12	0.419808	0.606	0.478	2.77881e-08	3	Ndufb9
Dnmt3b	1.89913e-12	0.725995	0.254	0.149	2.83939e-08	3	Dnmt3b
Nedd81	1.96027e-12	0.460634	0.548	0.414	2.9308e-08	3	Nedd8
Erp29	1.96689e-12	0.524419	0.411	0.281	2.9407e-08	3	Erp29
Bckdk	2.15265e-12	0.719434	0.273	0.165	3.21842e-08	3	Bckdk
Nup153	2.31492e-12	0.696368	0.273	0.164	3.46103e-08	3	Nup153
Sec61g	2.43014e-12	0.33589	0.763	0.626	3.6333e-08	3	Sec61g
Ezr	2.43352e-12	0.621975	0.273	0.162	3.63836e-08	3	Ezr
Grpel1	2.50792e-12	0.704537	0.27	0.162	3.74958e-08	3	Grpel1
Psmc5	2.70726e-12	0.613976	0.319	0.203	4.04762e-08	3	Psmc5
Ube2n	2.73309e-12	0.730351	0.266	0.16	4.08624e-08	3	Ube2n
Pin1	2.77155e-12	0.757198	0.274	0.168	4.14374e-08	3	Pin1
Tcerg1	2.84078e-12	0.581	0.371	0.246	4.24726e-08	3	Tcerg1
Ssb	2.91476e-12	0.468149	0.615	0.481	4.35785e-08	3	Ssb
Etfa	2.93902e-12	0.627491	0.349	0.229	4.39412e-08	3	Etfa
Actn4	3.17436e-12	0.576749	0.455	0.331	4.74598e-08	3	Actn4
Dnajc2	3.40336e-12	0.595701	0.369	0.25	5.08836e-08	3	Dnajc2
Mybbp1a	3.49656e-12	0.522515	0.509	0.378	5.2277e-08	3	Mybbp1a
Pnn	3.51049e-12	0.576653	0.38	0.255	5.24853e-08	3	Pnn
Cyc1	3.64228e-12	0.557038	0.392	0.268	5.44558e-08	3	Cyc1
Lsm4	3.99081e-12	0.531308	0.401	0.272	5.96667e-08	3	Lsm4
Suz12	4.12211e-12	0.628117	0.31	0.194	6.16297e-08	3	Suz12
Ewsr1	4.12277e-12	0.408717	0.593	0.457	6.16395e-08	3	Ewsr1
Phb	4.439e-12	0.561153	0.362	0.24	6.63675e-08	3	Phb
Psmc2	4.61609e-12	0.682713	0.313	0.201	6.90152e-08	3	Psmc2
Npm3	5.06263e-12	0.521862	0.466	0.336	7.56914e-08	3	Npm3
Vdac3	5.63512e-12	0.564317	0.404	0.28	8.42507e-08	3	Vdac3
Kcnq1ot1	5.98573e-12	0.542696	0.266	0.158	8.94927e-08	3	Kcnq1ot1
Ppic	6.37021e-12	0.597047	0.343	0.225	9.5241e-08	3	Ppic
Ncaph2	7.42437e-12	0.659621	0.329	0.217	1.11002e-07	3	Ncaph2
Tmem123	7.52059e-12	0.618674	0.361	0.244	1.1244e-07	3	Tmem123
Dnajc15	7.74619e-12	0.725716	0.274	0.169	1.15813e-07	3	Dnajc15
Tceal9	8.20188e-12	0.503045	0.44	0.312	1.22626e-07	3	Tceal9
Atp5d	8.29633e-12	0.459706	0.54	0.413	1.24039e-07	3	Atp5d
Ctbp1	9.22882e-12	0.512445	0.504	0.382	1.3798e-07	3	Ctbp1
Gar1	9.50155e-12	0.539843	0.369	0.248	1.42058e-07	3	Gar1
Cops3	9.51685e-12	0.615274	0.329	0.214	1.42286e-07	3	Cops3
Ncbp1	9.56957e-12	0.746845	0.25	0.15	1.43075e-07	3	Ncbp1
Uqcrc1	1.00169e-11	0.495168	0.473	0.343	1.49762e-07	3	Uqcrc1
Micos131	1.02977e-11	0.470762	0.527	0.397	1.5396e-07	3	Micos13
Cct5	1.1126e-11	0.342287	0.709	0.588	1.66345e-07	3	Cct5
Mrps14	1.17517e-11	0.502545	0.437	0.309	1.757e-07	3	Mrps14
Adsl	1.21802e-11	0.668145	0.278	0.172	1.82107e-07	3	Adsl
Tomm20	1.26102e-11	0.426103	0.574	0.44	1.88535e-07	3	Tomm20
Ruvbl2	1.43373e-11	0.618234	0.32	0.208	2.14358e-07	3	Ruvbl2
Gatad2a	1.44223e-11	0.708986	0.283	0.178	2.15627e-07	3	Gatad2a
Edf11	1.51687e-11	0.420072	0.553	0.422	2.26788e-07	3	Edf1
Vcp	1.61006e-11	0.329849	0.694	0.546	2.4072e-07	3	Vcp
Mrpl15	1.64876e-11	0.644576	0.293	0.185	2.46506e-07	3	Mrpl15
Mrps15	1.78714e-11	0.683205	0.26	0.158	2.67195e-07	3	Mrps15
Kras	1.78967e-11	0.616853	0.276	0.169	2.67574e-07	3	Kras
Aprt1	1.87701e-11	0.547922	0.449	0.325	2.80631e-07	3	Aprt
Ahcy	1.89132e-11	0.714312	0.258	0.157	2.82771e-07	3	Ahcy
Psmb7	1.93978e-11	0.581398	0.387	0.269	2.90016e-07	3	Psmb7
Tcof1	2.01481e-11	0.520085	0.372	0.252	3.01235e-07	3	Tcof1
Ost41	2.02717e-11	0.449455	0.584	0.464	3.03082e-07	3	Ost4
Psmd6	2.04348e-11	0.575539	0.307	0.195	3.05521e-07	3	Psmd6
Pfkl	2.18345e-11	0.572779	0.319	0.205	3.26447e-07	3	Pfkl
Carnmt1	2.21996e-11	0.69133	0.274	0.171	3.31906e-07	3	Carnmt1
Gtf2h5	2.2466e-11	0.583245	0.325	0.21	3.35889e-07	3	Gtf2h5
Eif2s2	2.33234e-11	0.37162	0.75	0.645	3.48708e-07	3	Eif2s2
Brix1	2.37671e-11	0.52497	0.312	0.197	3.55342e-07	3	Brix1
Mrps25	2.51075e-11	0.652821	0.287	0.181	3.75382e-07	3	Mrps25
Khdrbs1	2.5226e-11	0.472571	0.481	0.351	3.77153e-07	3	Khdrbs1
Cbx1	2.6182e-11	0.464116	0.472	0.341	3.91448e-07	3	Cbx1
Wdr12	2.75827e-11	0.601137	0.302	0.193	4.12389e-07	3	Wdr12
Cnih1	2.84274e-11	0.639765	0.29	0.184	4.25018e-07	3	Cnih1
Slc25a39	2.92663e-11	0.597611	0.294	0.186	4.37561e-07	3	Slc25a39
Fundc2	3.95625e-11	0.550036	0.362	0.246	5.91498e-07	3	Fundc2
Cmtm7	4.15501e-11	0.299176	0.683	0.553	6.21216e-07	3	Cmtm7
Tomm22	4.37005e-11	0.492014	0.403	0.279	6.53365e-07	3	Tomm22
Pin4	4.68824e-11	0.637428	0.28	0.176	7.00939e-07	3	Pin4
Smc4	4.87606e-11	0.399602	0.45	0.319	7.2902e-07	3	Smc4
Nsun2	5.0901e-11	0.499536	0.447	0.324	7.61021e-07	3	Nsun2
Rtn3	5.14934e-11	0.482934	0.452	0.326	7.69878e-07	3	Rtn3
Ankrd49	5.17551e-11	0.670894	0.276	0.173	7.7379e-07	3	Ankrd49
Cpsf2	5.23108e-11	0.594092	0.319	0.208	7.82098e-07	3	Cpsf2
Naa20	5.36342e-11	0.642068	0.29	0.185	8.01885e-07	3	Naa20
Dcp2	5.43927e-11	0.620933	0.263	0.161	8.13225e-07	3	Dcp2
Nme4	5.65319e-11	0.621415	0.29	0.185	8.45208e-07	3	Nme4
Gmfg	5.77111e-11	0.399046	0.556	0.421	8.62839e-07	3	Gmfg
Hdac3	5.81914e-11	0.625451	0.281	0.177	8.70019e-07	3	Hdac3
P4hb	6.2331e-11	0.387116	0.574	0.449	9.31911e-07	3	P4hb
Caprin1	6.65242e-11	0.375898	0.587	0.457	9.94604e-07	3	Caprin1
Rangap1	6.9889e-11	0.613327	0.267	0.165	1.04491e-06	3	Rangap1
Dctn3	7.00093e-11	0.669875	0.278	0.177	1.04671e-06	3	Dctn3
Mrps18c	7.24289e-11	0.505749	0.4	0.28	1.08289e-06	3	Mrps18c
S100a1	8.04077e-11	0.568583	0.42	0.307	1.20218e-06	3	S100a1
Ola1	8.70272e-11	0.653261	0.278	0.177	1.30114e-06	3	Ola1
Ptbp1	9.05039e-11	0.497291	0.512	0.39	1.35312e-06	3	Ptbp1
Dhx15	9.07062e-11	0.498593	0.465	0.341	1.35615e-06	3	Dhx15
Nfu1	1.00343e-10	0.601736	0.329	0.22	1.50022e-06	3	Nfu1
Hspbp1	1.06089e-10	0.56692	0.354	0.241	1.58614e-06	3	Hspbp1
Nip7	1.06144e-10	0.565026	0.312	0.203	1.58696e-06	3	Nip7
Mbd3	1.07574e-10	0.50768	0.364	0.248	1.60834e-06	3	Mbd3
Rsl1d1	1.09002e-10	0.455288	0.418	0.295	1.62969e-06	3	Rsl1d1
Pds5a	1.09669e-10	0.471958	0.424	0.303	1.63966e-06	3	Pds5a
Phb2	1.1122e-10	0.489952	0.413	0.293	1.66286e-06	3	Phb2
Tcea1	1.24534e-10	0.512058	0.359	0.244	1.86191e-06	3	Tcea1
Rex1bd	1.31316e-10	0.540705	0.388	0.273	1.9633e-06	3	Rex1bd
Akr1b3	1.31916e-10	0.532393	0.423	0.305	1.97227e-06	3	Akr1b3
Rbx1	1.54421e-10	0.395502	0.636	0.518	2.30875e-06	3	Rbx1
Kat2a	1.78401e-10	0.612696	0.281	0.18	2.66728e-06	3	Kat2a
Psmc3	1.84747e-10	0.443525	0.444	0.324	2.76215e-06	3	Psmc3
Rnaseh2c	2.03352e-10	0.530594	0.355	0.244	3.04031e-06	3	Rnaseh2c
Sf3b3	2.26343e-10	0.454155	0.444	0.322	3.38405e-06	3	Sf3b3
Mtch1	2.39683e-10	0.457647	0.4	0.28	3.5835e-06	3	Mtch1
Sod2	2.40838e-10	0.619447	0.375	0.267	3.60078e-06	3	Sod2
Stoml2	2.46887e-10	0.64831	0.312	0.208	3.6912e-06	3	Stoml2
Ncbp2	2.55161e-10	0.583697	0.267	0.167	3.81491e-06	3	Ncbp2
Casp2	2.73968e-10	0.593638	0.302	0.198	4.0961e-06	3	Casp2
Tomm40	2.78125e-10	0.556925	0.268	0.168	4.15825e-06	3	Tomm40
Usp14	2.96797e-10	0.615102	0.283	0.182	4.43742e-06	3	Usp14
Mrpl34	3.06299e-10	0.492159	0.418	0.302	4.57947e-06	3	Mrpl34
Rars	3.15214e-10	0.588336	0.284	0.182	4.71276e-06	3	Rars
Psmd14	3.31965e-10	0.518298	0.323	0.215	4.9632e-06	3	Psmd14
Psma5	3.37969e-10	0.417517	0.476	0.351	5.05297e-06	3	Psma5
Cherp	3.45397e-10	0.578731	0.276	0.176	5.16403e-06	3	Cherp
Cnih4	3.7815e-10	0.609259	0.303	0.201	5.65372e-06	3	Cnih4
Anapc131	3.91006e-10	0.41241	0.518	0.388	5.84593e-06	3	Anapc13
Tmem167	4.05079e-10	0.594351	0.312	0.207	6.05633e-06	3	Tmem167
Hnrnpc	4.21496e-10	0.313872	0.703	0.585	6.30179e-06	3	Hnrnpc
Mrpl28	4.33126e-10	0.616659	0.304	0.203	6.47566e-06	3	Mrpl28
Polr2j	4.69581e-10	0.525928	0.361	0.25	7.02071e-06	3	Polr2j
Eftud2	5.19806e-10	0.523319	0.355	0.245	7.77162e-06	3	Eftud2
Gadd45gip11	5.23917e-10	0.56505	0.361	0.255	7.83308e-06	3	Gadd45gip1
Psmd8	5.59536e-10	0.494847	0.395	0.281	8.36562e-06	3	Psmd8
Srsf4	5.83298e-10	0.54437	0.313	0.209	8.72089e-06	3	Srsf4
Timm8b	6.12387e-10	0.531904	0.384	0.274	9.1558e-06	3	Timm8b
Ddx18	6.16284e-10	0.493337	0.369	0.257	9.21406e-06	3	Ddx18
Taf1d	6.38358e-10	0.348846	0.525	0.398	9.5441e-06	3	Taf1d
Acp1	6.40587e-10	0.499871	0.273	0.172	9.57741e-06	3	Acp1
Bag1	6.70347e-10	0.53754	0.345	0.236	1.00224e-05	3	Bag1
Myl12a	6.85656e-10	0.376736	0.543	0.415	1.02512e-05	3	Myl12a
Mrpl36	7.22257e-10	0.543536	0.33	0.226	1.07985e-05	3	Mrpl36
Psmb8	7.50591e-10	0.326232	0.694	0.588	1.12221e-05	3	Psmb8
Etf1	7.89953e-10	0.467233	0.367	0.253	1.18106e-05	3	Etf1
Brd3	7.96466e-10	0.562386	0.384	0.275	1.1908e-05	3	Brd3
Tpm1	8.34384e-10	0.541983	0.33	0.225	1.24749e-05	3	Tpm1
Purb	8.3774e-10	0.427953	0.481	0.362	1.2525e-05	3	Purb
Tmco1	9.22803e-10	0.381544	0.521	0.394	1.37968e-05	3	Tmco1
Dynlrb11	1.05996e-09	0.468023	0.498	0.388	1.58475e-05	3	Dynlrb1
Mrpl57	1.08939e-09	0.5568	0.361	0.255	1.62875e-05	3	Mrpl57
Acat1	1.39627e-09	0.548027	0.368	0.262	2.08756e-05	3	Acat1
H2afy	1.39676e-09	0.301777	0.691	0.573	2.08829e-05	3	H2afy
Cdv3	1.43051e-09	0.499272	0.355	0.247	2.13876e-05	3	Cdv3
Stard4	1.48889e-09	0.550167	0.319	0.216	2.22603e-05	3	Stard4
Blmh	1.55711e-09	0.572851	0.313	0.212	2.32803e-05	3	Blmh
Ppib	1.59186e-09	0.338593	0.684	0.568	2.37999e-05	3	Ppib
Calm3	1.66698e-09	0.377388	0.537	0.414	2.49231e-05	3	Calm3
Psmd3	1.69769e-09	0.466932	0.341	0.232	2.53821e-05	3	Psmd3
Smyd2	1.96823e-09	0.542552	0.367	0.26	2.9427e-05	3	Smyd2
Ndufv3	2.00295e-09	0.473249	0.465	0.354	2.99461e-05	3	Ndufv3
Polr2e	2.0292e-09	0.485035	0.45	0.342	3.03386e-05	3	Polr2e
Polr2h	2.07269e-09	0.536747	0.325	0.223	3.09887e-05	3	Polr2h
Mrps33	2.07493e-09	0.425221	0.469	0.353	3.10223e-05	3	Mrps33
Rpn2	2.23103e-09	0.393789	0.53	0.404	3.33561e-05	3	Rpn2
B230219D22Rik	2.53624e-09	0.538453	0.33	0.228	3.79193e-05	3	B230219D22Rik
Mrps16	2.66694e-09	0.465607	0.413	0.304	3.98734e-05	3	Mrps16
Atp2a2	2.70477e-09	0.532174	0.352	0.25	4.0439e-05	3	Atp2a2
Lamtor2	3.29797e-09	0.472138	0.427	0.32	4.93079e-05	3	Lamtor2
Gng51	3.70574e-09	0.303772	0.69	0.57	5.54046e-05	3	Gng5
U2af2	3.73608e-09	0.458525	0.401	0.292	5.58581e-05	3	U2af2
Polr2i	4.08274e-09	0.513498	0.326	0.225	6.10411e-05	3	Polr2i
Glrx3	4.55965e-09	0.480923	0.42	0.318	6.81714e-05	3	Glrx3
Snrpa	4.68358e-09	0.441723	0.362	0.254	7.00242e-05	3	Snrpa
Fermt3	5.10192e-09	0.357297	0.639	0.536	7.62788e-05	3	Fermt3
Srsf9	5.2013e-09	0.522084	0.354	0.251	7.77647e-05	3	Srsf9
Commd1	5.27356e-09	0.50868	0.316	0.215	7.88451e-05	3	Commd1
Mrpl54	5.8813e-09	0.53281	0.343	0.243	8.79313e-05	3	Mrpl54
Polr2k1	6.51015e-09	0.471131	0.417	0.316	9.73333e-05	3	Polr2k
Morf4l2	6.93883e-09	0.42308	0.411	0.3	0.000103742	3	Morf4l2
Prkar2b	7.575e-09	0.484795	0.42	0.313	0.000113254	3	Prkar2b
Suclg1	8.06728e-09	0.475108	0.407	0.299	0.000120614	3	Suclg1
Ndufs8	8.60795e-09	0.442037	0.404	0.296	0.000128697	3	Ndufs8
Selenoh	8.93708e-09	0.463149	0.359	0.257	0.000133618	3	Selenoh
Snx5	9.15057e-09	0.369418	0.453	0.339	0.00013681	3	Snx5
Timm10b	9.68315e-09	0.485369	0.375	0.271	0.000144773	3	Timm10b
Ndufb5	9.95459e-09	0.404423	0.482	0.372	0.000148831	3	Ndufb5
Mrps21	1.07379e-08	0.420423	0.427	0.317	0.000160542	3	Mrps21
Dmac1	1.10275e-08	0.428146	0.349	0.244	0.000164873	3	Dmac1
M6pr	1.10726e-08	0.365144	0.531	0.415	0.000165546	3	M6pr
Psma3	1.12521e-08	0.379763	0.518	0.403	0.00016823	3	Psma3
Nudt21	1.19938e-08	0.453915	0.403	0.295	0.000179319	3	Nudt21
Pet100	1.38364e-08	0.398125	0.515	0.404	0.000206867	3	Pet100
Sf3a1	1.42267e-08	0.435987	0.348	0.246	0.000212704	3	Sf3a1
Hdlbp	1.49763e-08	0.405699	0.371	0.267	0.000223911	3	Hdlbp
Psmd7	1.58656e-08	0.432773	0.388	0.283	0.000237206	3	Psmd7
Vdac2	1.63848e-08	0.394888	0.453	0.345	0.000244969	3	Vdac2
Ndufb10	1.66582e-08	0.391859	0.462	0.353	0.000249057	3	Ndufb10
Pla2g4a	1.74401e-08	0.418463	0.365	0.259	0.000260748	3	Pla2g4a
Srrt	1.79904e-08	0.435749	0.345	0.242	0.000268974	3	Srrt
Sh3bgrl3	1.93319e-08	0.330206	0.522	0.409	0.000289031	3	Sh3bgrl3
Csk	2.09981e-08	0.430265	0.427	0.32	0.000313943	3	Csk
Park71	2.20801e-08	0.347269	0.589	0.481	0.000330119	3	Park7
Sf3b2	2.64941e-08	0.353442	0.499	0.388	0.000396113	3	Sf3b2
Syngr2	2.68411e-08	0.429948	0.358	0.256	0.000401301	3	Syngr2
Cs	2.83315e-08	0.404851	0.354	0.25	0.000423584	3	Cs
Ywhag	2.98431e-08	0.393076	0.427	0.32	0.000446184	3	Ywhag
Hnrnpul2	3.40656e-08	0.44592	0.382	0.282	0.000509314	3	Hnrnpul2
Gnb2	3.48453e-08	0.417694	0.468	0.364	0.000520972	3	Gnb2
Smarcc1	3.54487e-08	0.43417	0.381	0.28	0.000529994	3	Smarcc1
Snrpb2	3.65043e-08	0.410323	0.427	0.325	0.000545776	3	Snrpb2
Mrpl17	3.84986e-08	0.414559	0.385	0.283	0.000575593	3	Mrpl17
Nap1l4	4.01324e-08	0.420044	0.408	0.302	0.00060002	3	Nap1l4
Arhgdia	4.02384e-08	0.326397	0.501	0.383	0.000601604	3	Arhgdia
Ube2i	5.01967e-08	0.339198	0.465	0.352	0.000750491	3	Ube2i
Hypk	7.33982e-08	0.387498	0.417	0.313	0.00109738	3	Hypk
Nomo1	8.29516e-08	0.400536	0.407	0.305	0.00124021	3	Nomo1
Fubp1	9.6587e-08	0.339137	0.45	0.343	0.00144407	3	Fubp1
H2-Q7	1.1156e-07	0.252393	0.713	0.6	0.00166793	3	H2-Q7
Tram1	1.33493e-07	0.355687	0.465	0.36	0.00199586	3	Tram1
Lsm5	1.33791e-07	0.372095	0.394	0.291	0.0020003	3	Lsm5
Ndufa71	1.83692e-07	0.281142	0.628	0.523	0.00274638	3	Ndufa7
Larp4b	2.64574e-07	0.350716	0.444	0.344	0.00395564	3	Larp4b
Ndufb3	4.04181e-07	0.342648	0.465	0.365	0.00604291	3	Ndufb3
Emp31	5.83374e-07	0.335038	0.525	0.425	0.00872203	3	Emp3
Eprs	6.14293e-07	0.346904	0.42	0.318	0.0091843	3	Eprs
Tpm3	6.85063e-07	0.265434	0.596	0.491	0.0102424	3	Tpm3
Psmb2	6.9057e-07	0.2908	0.518	0.413	0.0103247	3	Psmb2
Ctnnb1	7.77744e-07	0.273419	0.545	0.444	0.011628	3	Ctnnb1
Angpt1	5.14537e-45	0.736051	0.931	0.816	7.69284e-41	4	Angpt1
Prkg1	5.5239e-38	0.938757	0.662	0.476	8.25879e-34	4	Prkg1
Zbtb20	6.88783e-38	0.751925	0.805	0.652	1.0298e-33	4	Zbtb20
Mecom	2.96259e-36	0.820181	0.725	0.56	4.42936e-32	4	Mecom
Rora	6.14523e-32	1.09271	0.472	0.278	9.18773e-28	4	Rora
Samd12	1.03316e-30	1.03293	0.528	0.348	1.54468e-26	4	Samd12
Lrmda	3.69346e-30	0.911111	0.579	0.406	5.52209e-26	4	Lrmda
Il1rapl21	6.08943e-29	1.12276	0.487	0.31	9.1043e-25	4	Il1rapl2
Nrxn1	1.33859e-28	0.98395	0.552	0.374	2.00133e-24	4	Nrxn1
Msi2	1.43259e-27	0.64626	0.789	0.659	2.14187e-23	4	Msi2
Elmo1	4.53711e-26	0.720511	0.663	0.51	6.78344e-22	4	Elmo1
Immp2l	2.13038e-23	0.886412	0.485	0.318	3.18513e-19	4	Immp2l
Magi21	1.09464e-22	0.983755	0.41	0.247	1.6366e-18	4	Magi2
Pbx1	8.26435e-22	0.525279	0.843	0.701	1.2356e-17	4	Pbx1
Cacnb2	4.82978e-21	0.851222	0.457	0.295	7.221e-17	4	Cacnb2
Maml2	3.41742e-20	0.898937	0.413	0.261	5.10939e-16	4	Maml2
Mctp1	5.95591e-20	0.728065	0.51	0.351	8.90468e-16	4	Mctp1
Foxp1	1.18781e-19	0.613652	0.644	0.51	1.77589e-15	4	Foxp1
Sgms1	3.09217e-19	0.757803	0.531	0.376	4.6231e-15	4	Sgms1
Ripor2	4.036e-19	0.778141	0.54	0.395	6.03422e-15	4	Ripor2
Runx1	4.33567e-19	0.63787	0.62	0.48	6.48225e-15	4	Runx1
Aff3	2.46287e-18	0.712451	0.56	0.422	3.68223e-14	4	Aff3
Atxn1	5.50807e-18	0.834789	0.377	0.234	8.23511e-14	4	Atxn1
Smyd3	1.07654e-17	0.817317	0.415	0.27	1.60953e-13	4	Smyd3
Akap13	3.78607e-17	0.561495	0.665	0.541	5.66055e-13	4	Akap13
Mllt32	1.42797e-16	0.725297	0.588	0.465	2.13495e-12	4	Mllt3
Gab2	1.04581e-15	0.934649	0.296	0.174	1.56359e-11	4	Gab2
Plcl11	1.19295e-15	0.872491	0.397	0.267	1.78358e-11	4	Plcl1
Adgrl41	4.70306e-15	0.579415	0.705	0.587	7.03155e-11	4	Adgrl4
Prkce	8.1959e-15	0.669779	0.418	0.284	1.22537e-10	4	Prkce
Fut8	1.04463e-14	0.672419	0.576	0.474	1.56183e-10	4	Fut8
Tbxas1	1.3018e-14	0.642886	0.569	0.449	1.94633e-10	4	Tbxas1
Fhit	1.61159e-14	0.915445	0.295	0.178	2.40949e-10	4	Fhit
Utrn	2.00996e-14	0.615157	0.503	0.369	3.0051e-10	4	Utrn
Pcdh7	4.07036e-14	0.802954	0.332	0.211	6.08559e-10	4	Pcdh7
Btbd9	4.86964e-14	0.715912	0.545	0.436	7.2806e-10	4	Btbd9
Fli1	5.24687e-14	0.572907	0.632	0.526	7.84459e-10	4	Fli1
Fchsd2	5.48147e-14	0.769398	0.388	0.263	8.19535e-10	4	Fchsd2
Fam172a	2.25383e-13	0.792861	0.374	0.257	3.3697e-09	4	Fam172a
Plxdc21	3.27072e-13	0.795609	0.424	0.305	4.89005e-09	4	Plxdc2
Hlf1	3.29497e-13	0.451043	0.719	0.608	4.92631e-09	4	Hlf
Ppp3ca	4.33552e-13	0.629805	0.528	0.419	6.48203e-09	4	Ppp3ca
Zfp950	6.3022e-13	0.76813	0.344	0.227	9.42243e-09	4	Zfp950
Fcho2	8.52232e-13	0.765646	0.383	0.269	1.27417e-08	4	Fcho2
Wwox	9.42183e-13	0.806482	0.37	0.258	1.40866e-08	4	Wwox
Arid1b	1.06501e-12	0.493151	0.599	0.486	1.5923e-08	4	Arid1b
Tox	1.16605e-12	0.750453	0.398	0.283	1.74337e-08	4	Tox
Kansl1	1.27651e-12	0.679498	0.436	0.314	1.90852e-08	4	Kansl1
St3gal4	2.22437e-12	0.800188	0.409	0.297	3.32566e-08	4	St3gal4
Cmip	3.01814e-12	0.719334	0.254	0.15	4.51242e-08	4	Cmip
Ppp1r9a	5.01204e-12	0.703301	0.356	0.239	7.49351e-08	4	Ppp1r9a
Pdgfd	5.33386e-12	0.72572	0.301	0.192	7.97465e-08	4	Pdgfd
Maml3	5.35624e-12	0.780521	0.278	0.174	8.00812e-08	4	Maml3
Dlg2	8.17661e-12	0.773566	0.355	0.245	1.22248e-07	4	Dlg2
Prkag2	1.16931e-11	0.705104	0.404	0.295	1.74823e-07	4	Prkag2
Foxn3	1.40674e-11	0.61974	0.466	0.358	2.10322e-07	4	Foxn3
Ash1l	2.57398e-11	0.641678	0.409	0.296	3.84836e-07	4	Ash1l
Med6	6.75861e-11	0.682239	0.398	0.292	1.01048e-06	4	Med6
Smg6	6.85717e-11	0.703534	0.395	0.29	1.02522e-06	4	Smg6
Phf21a	7.20481e-11	0.680484	0.383	0.281	1.07719e-06	4	Phf21a
Fbxl17	9.21782e-11	0.691858	0.335	0.23	1.37816e-06	4	Fbxl17
Cpq	9.50847e-11	0.596707	0.448	0.339	1.42161e-06	4	Cpq
Pard3b1	9.82312e-11	0.590802	0.43	0.318	1.46865e-06	4	Pard3b
Csgalnact11	1.07363e-10	0.626959	0.461	0.354	1.60518e-06	4	Csgalnact1
Dach1	1.54193e-10	0.62406	0.507	0.402	2.30533e-06	4	Dach1
Nipbl	2.35179e-10	0.540175	0.491	0.39	3.51617e-06	4	Nipbl
Smarca2	4.4255e-10	0.536432	0.515	0.41	6.61656e-06	4	Smarca2
Gse1	7.96034e-10	0.61449	0.449	0.345	1.19015e-05	4	Gse1
Baz2b	8.72246e-10	0.583977	0.43	0.328	1.30409e-05	4	Baz2b
Dst	1.89766e-09	0.567925	0.361	0.254	2.83719e-05	4	Dst
Zfp608	3.20384e-09	0.565163	0.41	0.309	4.79006e-05	4	Zfp608
Fnbp1	1.88725e-08	0.548531	0.406	0.306	0.000282163	4	Fnbp1
Cd74	6.92728e-205	2.69358	0.679	0.182	1.0357e-200	5	Cd74
H2-Aa	3.0291e-158	2.42078	0.59	0.161	4.52881e-154	5	H2-Aa
H2-Eb1	4.79868e-141	2.38657	0.486	0.113	7.17451e-137	5	H2-Eb1
H2-Ab1	4.68213e-117	2.29063	0.473	0.126	7.00025e-113	5	H2-Ab1
Ly6a1	7.24864e-103	1.72243	0.724	0.337	1.08374e-98	5	Ly6a
Iigp1	2.33165e-102	2.34679	0.519	0.172	3.48605e-98	5	Iigp1
Tgtp2	2.45358e-88	1.79568	0.624	0.276	3.66834e-84	5	Tgtp2
Stat1	5.83217e-83	1.89424	0.607	0.272	8.71968e-79	5	Stat1
Tgtp1	8.88652e-78	1.88414	0.509	0.196	1.32862e-73	5	Tgtp1
Irgm2	1.00856e-61	1.73566	0.478	0.199	1.5079e-57	5	Irgm2
Gvin11	4.32867e-59	1.50992	0.532	0.25	6.47179e-55	5	Gvin1
Gm121851	5.27786e-56	1.70455	0.517	0.255	7.89093e-52	5	Gm12185
Igtp	9.75707e-56	1.99532	0.328	0.108	1.45878e-51	5	Igtp
Gm40701	1.67172e-55	1.4379	0.526	0.248	2.49939e-51	5	Gm4070
Ifitm13	4.42067e-47	0.648972	0.964	0.833	6.60934e-43	5	Ifitm1
Shisa51	6.33877e-44	1.02627	0.67	0.414	9.4771e-40	5	Shisa5
Ly6e	3.45934e-42	0.761569	0.901	0.764	5.17206e-38	5	Ly6e
Ifitm3	1.48468e-39	0.700177	0.915	0.773	2.21974e-35	5	Ifitm3
Gbp2	3.60606e-38	1.58539	0.354	0.15	5.39143e-34	5	Gbp2
Oasl2	1.51518e-36	1.53811	0.315	0.128	2.26534e-32	5	Oasl2
Gbp6	1.70372e-34	1.54204	0.325	0.14	2.54724e-30	5	Gbp6
Ifi2031	1.24324e-33	0.920832	0.585	0.354	1.85877e-29	5	Ifi203
Gbp8	2.14145e-33	1.41457	0.296	0.119	3.20168e-29	5	Gbp8
Mettl7a11	1.25373e-32	0.935265	0.565	0.329	1.87445e-28	5	Mettl7a1
Rtp4	2.10361e-32	1.45693	0.325	0.144	3.14511e-28	5	Rtp4
Gbp7	2.74225e-32	1.26735	0.432	0.229	4.09993e-28	5	Gbp7
Ltb1	7.75961e-32	1.15596	0.476	0.262	1.16014e-27	5	Ltb
Irgm1	8.45877e-31	1.26967	0.31	0.132	1.26467e-26	5	Irgm1
Serpina3g	2.64967e-30	1.10503	0.617	0.415	3.96152e-26	5	Serpina3g
H2-Q6	2.43829e-27	0.874109	0.483	0.273	3.64549e-23	5	H2-Q6
H2-T231	7.40735e-26	0.867482	0.491	0.292	1.10747e-21	5	H2-T23
Mndal	3.0409e-24	0.91404	0.515	0.324	4.54645e-20	5	Mndal
Lst12	9.1274e-23	0.86385	0.5	0.312	1.36464e-18	5	Lst1
Ifi44	4.91632e-22	1.29618	0.291	0.144	7.35039e-18	5	Ifi44
Parp14	1.19957e-21	1.11568	0.281	0.136	1.79348e-17	5	Parp14
Serpina3f	1.88093e-21	1.42397	0.269	0.129	2.81217e-17	5	Serpina3f
Psmb81	2.54005e-21	0.568024	0.755	0.584	3.79764e-17	5	Psmb8
Tmem176b1	2.89904e-21	0.595007	0.735	0.564	4.33435e-17	5	Tmem176b
Samhd1	2.50059e-20	0.843703	0.459	0.287	3.73863e-16	5	Samhd1
Irf1	4.62309e-20	1.13053	0.327	0.177	6.91198e-16	5	Irf1
Gimap62	1.56119e-19	0.60548	0.578	0.385	2.33414e-15	5	Gimap6
Psmb10	3.94928e-19	0.734463	0.52	0.347	5.90457e-15	5	Psmb10
Stxbp4	6.26864e-18	0.894316	0.366	0.213	9.37225e-14	5	Stxbp4
Procr2	2.93973e-17	0.693223	0.452	0.284	4.39519e-13	5	Procr
Trafd1	3.79321e-16	0.881145	0.304	0.17	5.67123e-12	5	Trafd1
Trim30a	2.4138e-15	0.777716	0.379	0.234	3.60887e-11	5	Trim30a
Parp9	2.75955e-15	0.97152	0.259	0.139	4.1258e-11	5	Parp9
Bst2	3.96993e-15	0.859088	0.418	0.281	5.93544e-11	5	Bst2
Dtx3l	7.02016e-15	0.844205	0.31	0.179	1.04958e-10	5	Dtx3l
Txnip1	9.1046e-15	0.406969	0.886	0.779	1.36123e-10	5	Txnip
Psme1	3.76052e-14	0.467418	0.699	0.547	5.62235e-10	5	Psme1
Il2rg	3.79086e-14	0.893481	0.294	0.171	5.66772e-10	5	Il2rg
Limd2	4.03999e-14	0.577139	0.527	0.376	6.04018e-10	5	Limd2
Ifi27	6.50923e-14	0.850386	0.338	0.211	9.73195e-10	5	Ifi27
Psmb9	6.71241e-14	0.603148	0.5	0.352	1.00357e-09	5	Psmb9
H2-Q4	2.90535e-13	0.706161	0.391	0.254	4.34378e-09	5	H2-Q4
Tapbp	2.9117e-13	0.584727	0.502	0.36	4.35328e-09	5	Tapbp
Tgm21	6.38276e-13	0.454937	0.672	0.521	9.54286e-09	5	Tgm2
Hlf2	1.32791e-12	0.323569	0.762	0.605	1.98536e-08	5	Hlf
Rnf213	2.54253e-12	0.818594	0.359	0.236	3.80133e-08	5	Rnf213
Ifi47	1.25227e-11	0.77273	0.359	0.243	1.87227e-07	5	Ifi47
Clec1a1	1.82963e-11	0.561798	0.362	0.236	2.73548e-07	5	Clec1a
Trim12c	1.98607e-11	0.746216	0.299	0.186	2.96938e-07	5	Trim12c
Lgals3bp1	2.88655e-11	0.479964	0.537	0.397	4.31568e-07	5	Lgals3bp
Tnip3	4.32092e-11	0.606599	0.344	0.221	6.4602e-07	5	Tnip3
Plaat3	6.4636e-11	0.621484	0.464	0.342	9.66372e-07	5	Plaat3
Lsp1	8.85226e-11	0.611705	0.35	0.232	1.3235e-06	5	Lsp1
Nop53	1.53996e-10	0.384966	0.67	0.52	2.3024e-06	5	Nop53
Olfr56	1.56445e-10	0.81529	0.286	0.18	2.339e-06	5	Olfr56
H2-T22	2.73184e-10	0.5609	0.418	0.298	4.08437e-06	5	H2-T22
Gimap11	2.94684e-10	0.560523	0.442	0.319	4.40582e-06	5	Gimap1
Pdzk1ip13	3.2963e-10	0.404054	0.699	0.563	4.9283e-06	5	Pdzk1ip1
Sult1a12	3.51736e-10	0.34478	0.541	0.393	5.2588e-06	5	Sult1a1
Myl102	4.19472e-10	0.315151	0.651	0.52	6.27152e-06	5	Myl10
H2-DMa	4.27359e-10	0.67665	0.367	0.254	6.38945e-06	5	H2-DMa
Tap1	4.6944e-10	0.548753	0.423	0.303	7.01859e-06	5	Tap1
Irf9	6.12485e-10	0.655725	0.304	0.195	9.15727e-06	5	Irf9
Rabac12	1.64263e-09	0.441833	0.59	0.47	2.45589e-05	5	Rabac1
Nceh1	2.6471e-09	0.478217	0.413	0.294	3.95767e-05	5	Nceh1
Mllt33	3.22677e-09	0.334957	0.604	0.465	4.82434e-05	5	Mllt3
Klf61	4.24428e-09	0.547551	0.391	0.277	6.34563e-05	5	Klf6
Pnp	4.76804e-09	0.408128	0.553	0.429	7.12869e-05	5	Pnp
H2-Q71	4.98988e-09	0.357928	0.711	0.602	7.46037e-05	5	H2-Q7
Pim12	6.25507e-09	0.31941	0.648	0.513	9.35196e-05	5	Pim1
Adgrl42	1.37847e-08	0.260919	0.709	0.589	0.000206095	5	Adgrl4
Saraf	3.97235e-08	0.403518	0.524	0.408	0.000593906	5	Saraf
Apobec3	4.43405e-08	0.460524	0.459	0.348	0.000662935	5	Apobec3
Rnaset2b	4.81362e-08	0.439322	0.439	0.329	0.000719685	5	Rnaset2b
Nrxn11	6.90202e-08	0.303011	0.502	0.381	0.00103192	5	Nrxn1
Use12	7.59812e-08	0.36678	0.536	0.424	0.001136	5	Use1
Cbx62	1.02972e-07	0.370018	0.553	0.435	0.00153953	5	Cbx6
Gm102602	1.04489e-07	0.394507	0.422	0.309	0.00156222	5	Gm10260
Tmem176a2	1.72162e-07	0.35067	0.531	0.421	0.002574	5	Tmem176a
Gcnt2	2.01054e-07	0.31869	0.6	0.484	0.00300596	5	Gcnt2
Laptm4a	2.04374e-07	0.33871	0.607	0.489	0.0030556	5	Laptm4a
Mtcl12	2.32041e-07	0.373012	0.49	0.375	0.00346924	5	Mtcl1
Psme21	2.70347e-07	0.425436	0.447	0.346	0.00404196	5	Psme2
Slc50a1	5.84849e-07	0.402193	0.378	0.277	0.00874408	5	Slc50a1
Trmt1121	7.26622e-07	0.263133	0.602	0.484	0.0108637	5	Trmt112
Eng	1.93797e-06	0.375119	0.524	0.423	0.0289747	5	Eng
Hacd41	2.21495e-06	0.365724	0.509	0.405	0.0331158	5	Hacd4
Nup932	2.34923e-06	0.307641	0.631	0.526	0.0351234	5	Nup93
Psap	6.4689e-06	0.287676	0.588	0.487	0.0967165	5	Psap
Pkm	8.45972e-06	0.260677	0.636	0.535	0.126481	5	Pkm
Tspan13	1.37181e-05	0.277673	0.527	0.424	0.2051	5	Tspan13
Camk1d	5.68098e-179	3.9052	0.617	0.096	8.49363e-175	6	Camk1d
mt-Co1	4.22587e-163	3.20774	1	0.755	6.31809e-159	6	mt-Co1
Cdk8	2.46526e-119	3.3282	0.635	0.164	3.68581e-115	6	Cdk8
Cmss1	4.60141e-96	2.95538	0.688	0.252	6.87957e-92	6	Cmss1
Gphn	1.82366e-51	2.11216	0.578	0.246	2.72655e-47	6	Gphn
Angpt11	3.48323e-42	1.08364	0.954	0.822	5.20778e-38	6	Angpt1
Pbx11	3.28436e-30	1.00042	0.883	0.707	4.91044e-26	6	Pbx1
Lars2	6.98286e-29	2.16724	0.422	0.194	1.04401e-24	6	Lars2
Lrmda1	5.53232e-24	1.32251	0.617	0.415	8.27137e-20	6	Lrmda
Mecom1	9.85814e-24	1.08955	0.748	0.569	1.47389e-19	6	Mecom
Prkg11	2.34616e-23	1.12262	0.681	0.486	3.50775e-19	6	Prkg1
Zbtb201	1.01043e-21	0.921617	0.801	0.662	1.51069e-17	6	Zbtb20
Adgb1	6.24164e-17	0.715393	0.823	0.638	9.33188e-13	6	Adgb
Il1rapl22	2.55208e-16	1.18881	0.493	0.32	3.81561e-12	6	Il1rapl2
Peak1	4.51538e-14	1.62618	0.287	0.14	6.75094e-10	6	Peak1
Vmp11	3.02249e-09	0.46147	0.851	0.741	4.51893e-05	6	Vmp1
Pard3b2	1.33579e-08	0.943539	0.436	0.325	0.000199713	6	Pard3b
Plcl12	2.2256e-08	1.03202	0.401	0.275	0.00033275	6	Plcl1
1700016D06Rik1	5.12321e-07	0.450854	0.741	0.578	0.00765971	6	1700016D06Rik
C330007P06Rik2	2.4278e-05	0.403567	0.777	0.632	0.362981	6	C330007P06Rik
Carf1	2.80816e-05	0.33191	0.826	0.671	0.419848	6	Carf
Pde4d1	5.21698e-05	0.320438	0.716	0.592	0.77999	6	Pde4d
Skint61	0.000167078	0.347616	0.645	0.529	1	6	Skint6
Gm42418	0.000188788	2.60251	0.163	0.32	1	6	Gm42418
Cnot61	0.00105292	0.308944	0.851	0.739	1	6	Cnot6
Slc22a271	0.00221155	0.256644	0.73	0.601	1	6	Slc22a27
Top2a1	0	4.29402	0.992	0.128	0	7	Top2a
Mki67	0	4.39156	0.944	0.088	0	7	Mki67
Birc5	0	4.27952	0.835	0.055	0	7	Birc5
Ccna2	0	4.17234	0.739	0.053	0	7	Ccna2
Ckap2l	0	4.58899	0.711	0.039	0	7	Ckap2l
Nusap1	0	4.71402	0.695	0.04	0	7	Nusap1
Pbk	0	4.47198	0.639	0.033	0	7	Pbk
Prc1	0	4.63788	0.598	0.031	0	7	Prc1
Pimreg	0	5.18259	0.422	0.013	0	7	Pimreg
Aurkb	3.14325e-307	4.38732	0.53	0.027	4.69947e-303	7	Aurkb
Kif11	2.76306e-304	4.0647	0.631	0.043	4.13105e-300	7	Kif11
Bub1b	5.64438e-304	4.35897	0.538	0.028	8.43891e-300	7	Bub1b
Cdca3	1.06093e-301	4.05728	0.622	0.042	1.5862e-297	7	Cdca3
Cdca8	6.43429e-293	4.00387	0.631	0.045	9.6199e-289	7	Cdca8
Cenpf	9.55375e-293	4.6913	0.558	0.034	1.42838e-288	7	Cenpf
Nuf2	8.81756e-285	4.35296	0.49	0.025	1.31831e-280	7	Nuf2
Hmmr	6.90035e-282	4.62909	0.482	0.024	1.03167e-277	7	Hmmr
Hist1h2ap	3.72547e-272	4.78479	0.711	0.071	5.56995e-268	7	Hist1h2ap
Cdk1	1.32627e-269	3.6621	0.779	0.086	1.9829e-265	7	Cdk1
Spc24	4.9425e-267	3.88077	0.606	0.046	7.38953e-263	7	Spc24
Kif22	6.00457e-259	4.11592	0.502	0.03	8.97743e-255	7	Kif22
Ccnb2	2.7391e-255	3.90089	0.598	0.047	4.09523e-251	7	Ccnb2
Tpx2	6.63473e-255	4.03209	0.542	0.038	9.91959e-251	7	Tpx2
Ube2c	5.6784e-253	4.27865	0.522	0.035	8.48978e-249	7	Ube2c
Spc25	3.75525e-247	4.03474	0.518	0.035	5.61448e-243	7	Spc25
Ncapg	4.96284e-243	4.06742	0.49	0.031	7.41994e-239	7	Ncapg
Hist1h2ae	2.03028e-242	4.52181	0.478	0.03	3.03547e-238	7	Hist1h2ae
Sgo1	2.63637e-242	4.29489	0.426	0.022	3.94163e-238	7	Sgo1
Plk1	6.30723e-242	4.24569	0.414	0.02	9.42994e-238	7	Plk1
Cdca5	5.20133e-234	4.37896	0.426	0.023	7.77652e-230	7	Cdca5
Espl1	2.95199e-233	4.45881	0.373	0.016	4.41351e-229	7	Espl1
Ncapd2	6.42582e-221	3.29537	0.743	0.095	9.60724e-217	7	Ncapd2
Cks21	8.31917e-217	3.51466	0.835	0.139	1.2438e-212	7	Cks2
Neil3	1.4021e-214	3.99969	0.442	0.029	2.09628e-210	7	Neil3
Kif20a	7.12557e-214	4.36046	0.386	0.021	1.06534e-209	7	Kif20a
Kif2c	8.37807e-210	4.70089	0.305	0.011	1.25261e-205	7	Kif2c
Hist1h2af	2.3447e-206	4.75533	0.293	0.01	3.50556e-202	7	Hist1h2af
Knl1	3.26972e-205	4.09971	0.394	0.023	4.88856e-201	7	Knl1
Aspm	1.89526e-201	4.37246	0.378	0.021	2.8336e-197	7	Aspm
Spag5	4.05508e-201	4.29619	0.357	0.019	6.06275e-197	7	Spag5
Mis18bp1	6.64606e-201	4.43785	0.369	0.02	9.93653e-197	7	Mis18bp1
Bub1	1.33026e-196	4.30128	0.341	0.017	1.98887e-192	7	Bub1
Kif15	4.48779e-195	3.84061	0.418	0.028	6.70969e-191	7	Kif15
Racgap1	8.52398e-195	3.51078	0.578	0.061	1.27442e-190	7	Racgap1
Cenpe	2.78633e-192	3.54888	0.482	0.04	4.16584e-188	7	Cenpe
Hist1h2ab	6.31052e-191	4.82506	0.353	0.02	9.43486e-187	7	Hist1h2ab
Cks1b1	1.74266e-189	2.95636	0.888	0.181	2.60546e-185	7	Cks1b
Pclaf	2.94965e-189	3.48277	0.506	0.046	4.41002e-185	7	Pclaf
Esco2	2.9143e-188	4.57535	0.293	0.012	4.35717e-184	7	Esco2
Kif4	2.62152e-187	4.20096	0.337	0.018	3.91943e-183	7	Kif4
Kifc1	7.70864e-186	3.86389	0.394	0.026	1.15252e-181	7	Kifc1
Ccnb1	7.35719e-185	3.97437	0.462	0.039	1.09997e-180	7	Ccnb1
H2afx	1.67e-184	3.29057	0.791	0.144	2.49682e-180	7	H2afx
Ccnf	4.38314e-182	3.89526	0.394	0.027	6.55323e-178	7	Ccnf
Cep55	3.59059e-181	4.45988	0.281	0.012	5.36829e-177	7	Cep55
Tk11	1.14901e-180	3.48168	0.574	0.067	1.71788e-176	7	Tk1
Kif20b	9.5088e-179	3.388	0.55	0.06	1.42166e-174	7	Kif20b
Hist1h2an	3.29349e-176	4.76445	0.293	0.014	4.9241e-172	7	Hist1h2an
Hist1h2ag	5.02538e-176	4.49194	0.398	0.03	7.51345e-172	7	Hist1h2ag
Hmgb21	1.80373e-175	3.1874	1	0.407	2.69675e-171	7	Hmgb2
Hist1h2ai	8.01065e-175	4.48599	0.373	0.026	1.19767e-170	7	Hist1h2ai
Cdc20	2.58531e-173	3.64623	0.546	0.063	3.86529e-169	7	Cdc20
Kif23	7.2779e-172	3.56128	0.51	0.053	1.08812e-167	7	Kif23
Aurka	4.53583e-168	4.23522	0.329	0.02	6.78152e-164	7	Aurka
Anln	2.23867e-167	3.85289	0.365	0.025	3.34704e-163	7	Anln
Arhgap11a	9.99387e-167	3.54721	0.434	0.038	1.49418e-162	7	Arhgap11a
Incenp	5.25342e-166	3.36223	0.57	0.072	7.85439e-162	7	Incenp
Knstrn	3.92647e-164	3.63011	0.462	0.045	5.87046e-160	7	Knstrn
Hist1h2ad	9.73419e-163	4.46721	0.353	0.025	1.45536e-158	7	Hist1h2ad
Gm10184	1.08922e-161	3.68717	0.43	0.039	1.62849e-157	7	Gm10184
Ndc80	1.59331e-161	3.55202	0.398	0.032	2.38216e-157	7	Ndc80
Hist1h2ah	2.9139e-161	4.79588	0.329	0.021	4.35657e-157	7	Hist1h2ah
Fbxo5	1.54508e-159	3.21415	0.51	0.057	2.31005e-155	7	Fbxo5
Lmnb11	3.10163e-157	2.69796	0.815	0.173	4.63724e-153	7	Lmnb1
Ska1	5.15436e-157	4.06485	0.281	0.015	7.70628e-153	7	Ska1
Foxm1	1.42359e-154	3.89122	0.321	0.021	2.12841e-150	7	Foxm1
Cenpw1	6.81213e-153	2.87135	0.679	0.113	1.01848e-148	7	Cenpw
Shcbp1	3.83999e-148	3.78495	0.349	0.027	5.74117e-144	7	Shcbp1
Ttk	3.22827e-146	3.89882	0.289	0.017	4.82659e-142	7	Ttk
Cdkn3	1.37608e-145	4.65358	0.253	0.013	2.05738e-141	7	Cdkn3
Tuba1b1	4.54879e-145	2.51007	0.996	0.627	6.8009e-141	7	Tuba1b
Ckap2	7.09237e-144	3.62071	0.402	0.038	1.06038e-139	7	Ckap2
Cdca2	1.92741e-143	3.40634	0.394	0.036	2.88167e-139	7	Cdca2
Tubb51	1.54721e-142	2.42097	1	0.634	2.31323e-138	7	Tubb5
Sgo2a	5.89185e-138	4.16611	0.265	0.015	8.8089e-134	7	Sgo2a
H2afz1	1.57631e-134	2.32156	0.992	0.632	2.35674e-130	7	H2afz
Ncaph	8.0932e-134	3.88644	0.297	0.021	1.21001e-129	7	Ncaph
Smc41	8.76711e-134	2.50682	0.92	0.31	1.31077e-129	7	Smc4
Mad2l1	2.71997e-131	2.97892	0.522	0.074	4.06662e-127	7	Mad2l1
Stmn11	5.69993e-129	2.37001	0.992	0.537	8.52197e-125	7	Stmn1
Tyms1	5.42947e-128	2.87692	0.606	0.107	8.11761e-124	7	Tyms
Smc21	5.38673e-126	2.62096	0.719	0.158	8.0537e-122	7	Smc2
Cenpa	3.05083e-125	3.23318	0.538	0.086	4.5613e-121	7	Cenpa
Tacc3	3.42722e-124	3.18022	0.422	0.05	5.12403e-120	7	Tacc3
Cenpm	3.85838e-124	3.55047	0.325	0.028	5.76866e-120	7	Cenpm
Rrm11	6.23409e-118	2.50978	0.715	0.164	9.32059e-114	7	Rrm1
Ube2s	3.0597e-117	2.46304	0.791	0.217	4.57455e-113	7	Ube2s
Hist1h2ao	2.71798e-116	4.67679	0.414	0.055	4.06365e-112	7	Hist1h2ao
Psrc1	1.40673e-115	3.78942	0.273	0.021	2.10321e-111	7	Psrc1
Rad51ap1	2.50851e-114	3.34405	0.325	0.031	3.75047e-110	7	Rad51ap1
Ptn	1.26088e-112	3.74096	0.265	0.02	1.88514e-108	7	Ptn
Arhgef39	2.66648e-112	3.77079	0.261	0.019	3.98666e-108	7	Arhgef39
Asf1b	9.22747e-112	3.00239	0.386	0.046	1.3796e-107	7	Asf1b
Lockd	1.3863e-109	3.37626	0.414	0.056	2.07266e-105	7	Lockd
Cenph	5.11725e-108	2.97237	0.422	0.057	7.6508e-104	7	Cenph
Hist1h4i	4.04365e-105	3.18063	0.369	0.045	6.04567e-101	7	Hist1h4i
Cip2a	2.87015e-103	3.17983	0.333	0.037	4.29116e-99	7	Cip2a
Cenpp	2.98845e-102	2.9534	0.394	0.052	4.46803e-98	7	Cenpp
Rrm2	1.25822e-101	2.64445	0.462	0.074	1.88117e-97	7	Rrm2
Cks1brt	8.06347e-101	3.2881	0.394	0.055	1.20557e-96	7	Cks1brt
H2afv1	5.97257e-100	2.12412	0.908	0.396	8.9296e-96	7	H2afv
Nucks11	3.28966e-99	2.05512	0.912	0.419	4.91837e-95	7	Nucks1
Hjurp	8.74218e-99	2.37248	0.771	0.239	1.30704e-94	7	Hjurp
Cenpl	1.59608e-96	2.91622	0.386	0.053	2.3863e-92	7	Cenpl
Ncapg2	5.3078e-96	2.88592	0.369	0.049	7.93569e-92	7	Ncapg2
Cenpk	4.10785e-93	2.98172	0.349	0.045	6.14165e-89	7	Cenpk
Tubb4b	5.50832e-93	2.03332	0.904	0.403	8.23549e-89	7	Tubb4b
Tuba1c	6.4729e-93	2.60545	0.719	0.227	9.67764e-89	7	Tuba1c
Hmgb1	4.10845e-92	1.37576	0.992	0.761	6.14254e-88	7	Hmgb1
Tmpo1	4.64618e-92	1.95629	0.859	0.325	6.94651e-88	7	Tmpo
Cit	9.99357e-90	2.96245	0.325	0.04	1.49414e-85	7	Cit
Kpna2	1.384e-88	3.09002	0.297	0.034	2.06921e-84	7	Kpna2
Tuba8	3.65433e-86	2.84541	0.39	0.061	5.46359e-82	7	Tuba8
Hist1h2ac	6.90825e-86	3.48292	0.398	0.067	1.03285e-81	7	Hist1h2ac
Rad51	4.18221e-85	2.97437	0.321	0.041	6.25283e-81	7	Rad51
Jpt11	3.97698e-82	2.2307	0.687	0.209	5.94599e-78	7	Jpt1
Cdc25b	6.02332e-80	3.23009	0.285	0.035	9.00547e-76	7	Cdc25b
Atad21	9.53941e-80	2.43071	0.53	0.122	1.42624e-75	7	Atad2
Cmc2	1.53532e-78	2.41187	0.45	0.087	2.29545e-74	7	Cmc2
Nsl1	8.53833e-77	3.15918	0.265	0.031	1.27657e-72	7	Nsl1
Cdc7	4.72068e-76	2.6088	0.378	0.063	7.05789e-72	7	Cdc7
Ndc1	2.32612e-75	2.2632	0.506	0.113	3.47778e-71	7	Ndc1
Ran1	1.60131e-73	1.44657	0.948	0.572	2.39412e-69	7	Ran
Hmgn21	3.28724e-73	1.43975	0.948	0.536	4.91475e-69	7	Hmgn2
E2f8	6.71845e-73	2.85078	0.273	0.035	1.00448e-68	7	E2f8
Clspn	3.34769e-70	2.868	0.305	0.045	5.00514e-66	7	Clspn
Trim59	4.26366e-69	2.66047	0.382	0.072	6.37459e-65	7	Trim59
H1fx	1.6994e-67	2.42923	0.43	0.092	2.54078e-63	7	H1fx
Ezh21	5.74074e-67	1.95417	0.566	0.151	8.58298e-63	7	Ezh2
Dek1	2.1633e-64	1.56467	0.859	0.436	3.23436e-60	7	Dek
Itga2b1	4.17375e-64	2.05497	0.622	0.203	6.24017e-60	7	Itga2b
Anp32e1	4.66112e-64	1.7209	0.775	0.321	6.96884e-60	7	Anp32e
Gmnn1	9.47065e-64	2.28894	0.43	0.096	1.41596e-59	7	Gmnn
Nt5dc2	1.56469e-63	2.57446	0.337	0.06	2.33937e-59	7	Nt5dc2
Hmgb31	1.0397e-62	1.81977	0.703	0.258	1.55445e-58	7	Hmgb3
Dbf4	4.19341e-62	2.66363	0.297	0.048	6.26957e-58	7	Dbf4
Rangap11	8.17847e-62	2.046	0.554	0.161	1.22276e-57	7	Rangap1
Plk4	8.23017e-62	2.75899	0.261	0.037	1.23049e-57	7	Plk4
Rad21	4.32777e-61	1.91326	0.675	0.253	6.47045e-57	7	Rad21
Dnmt11	2.77677e-60	1.79984	0.655	0.229	4.15155e-56	7	Dnmt1
Txn11	4.20423e-60	1.17981	0.972	0.747	6.28574e-56	7	Txn1
Ckap5	1.07281e-59	2.15361	0.502	0.138	1.60396e-55	7	Ckap5
Crip11	2.16935e-58	1.54914	0.863	0.446	3.24339e-54	7	Crip1
Rpa31	2.99945e-58	1.9762	0.53	0.153	4.48447e-54	7	Rpa3
Mfsd2b	2.76948e-57	2.74979	0.269	0.043	4.14065e-53	7	Mfsd2b
Srsf31	3.97206e-57	1.2465	0.932	0.585	5.93863e-53	7	Srsf3
Uhrf11	4.3773e-56	1.91358	0.482	0.127	6.5445e-52	7	Uhrf1
G2e3	5.73817e-56	2.28585	0.373	0.081	8.57914e-52	7	G2e3
Cbx31	6.628e-56	1.28609	0.904	0.539	9.90952e-52	7	Cbx3
Dnajc91	7.18661e-56	1.9359	0.578	0.191	1.07447e-51	7	Dnajc9
Ccdc34	1.455e-53	1.988	0.454	0.12	2.17537e-49	7	Ccdc34
1810037I17Rik1	1.62814e-53	1.40566	0.827	0.443	2.43423e-49	7	1810037I17Rik
Cenps	2.87794e-53	2.43554	0.281	0.049	4.30282e-49	7	Cenps
Ska2	3.16356e-53	2.41184	0.273	0.046	4.72984e-49	7	Ska2
Dut1	8.36258e-53	1.67454	0.703	0.294	1.25029e-48	7	Dut
Slc22a31	4.41437e-52	2.10428	0.418	0.105	6.59993e-48	7	Slc22a3
Gp1bb	8.68303e-52	2.40778	0.301	0.058	1.2982e-47	7	Gp1bb
Bora	1.02e-51	2.22427	0.394	0.096	1.525e-47	7	Bora
Hirip31	1.5148e-51	2.07577	0.414	0.104	2.26477e-47	7	Hirip3
Trip13	6.56183e-51	2.4264	0.257	0.043	9.8106e-47	7	Trip13
Dynll11	8.19808e-51	1.44297	0.803	0.378	1.2257e-46	7	Dynll1
Slbp1	2.66314e-50	1.81201	0.57	0.195	3.98166e-46	7	Slbp
Cep128	3.3083e-50	2.08229	0.353	0.079	4.94623e-46	7	Cep128
Usp11	3.16595e-49	1.64937	0.578	0.194	4.73341e-45	7	Usp1
Rfc51	6.63083e-49	2.00462	0.43	0.117	9.91376e-45	7	Rfc5
Mns1	3.54449e-47	2.27302	0.285	0.056	5.29937e-43	7	Mns1
Nde1	4.51169e-47	2.05657	0.398	0.104	6.74543e-43	7	Nde1
Prim11	9.26998e-47	2.04553	0.369	0.09	1.38595e-42	7	Prim1
Rfc41	1.36119e-46	2.10441	0.345	0.08	2.03511e-42	7	Rfc4
Rbm31	2.5096e-46	1.18367	0.88	0.514	3.7521e-42	7	Rbm3
Snrpd11	3.58501e-45	1.30423	0.775	0.374	5.35995e-41	7	Snrpd1
Cox6a11	5.15534e-45	1.05825	0.924	0.654	7.70775e-41	7	Cox6a1
Pola11	7.45987e-45	1.84858	0.474	0.148	1.11533e-40	7	Pola1
Pmf11	8.00116e-45	1.94863	0.406	0.111	1.19625e-40	7	Pmf1
Hnrnpa31	1.53149e-44	1.04536	0.944	0.663	2.28972e-40	7	Hnrnpa3
Atad5	3.94854e-44	2.06862	0.317	0.071	5.90347e-40	7	Atad5
Hnrnpab1	9.88342e-44	1.12263	0.888	0.604	1.47767e-39	7	Hnrnpab
Raly1	5.73589e-43	1.34386	0.707	0.304	8.57572e-39	7	Raly
Rnaseh2c1	2.82219e-42	1.55132	0.602	0.242	4.21945e-38	7	Rnaseh2c
Cox7a21	7.46689e-42	1.16055	0.851	0.527	1.11637e-37	7	Cox7a2
Cbx51	8.8141e-42	1.41803	0.655	0.282	1.3178e-37	7	Cbx5
Ube2t	1.48963e-41	2.21849	0.261	0.053	2.22715e-37	7	Ube2t
Alyref1	3.95644e-41	1.41264	0.647	0.273	5.91527e-37	7	Alyref
Nrm	2.3045e-40	2.1252	0.281	0.062	3.44546e-36	7	Nrm
Psat11	2.65122e-40	1.69721	0.466	0.153	3.96384e-36	7	Psat1
Oxct11	8.12642e-40	1.55085	0.574	0.228	1.21498e-35	7	Oxct1
Snrpf1	6.10891e-39	0.880504	0.94	0.724	9.13344e-35	7	Snrpf
Cdk61	1.06652e-38	1.33762	0.715	0.36	1.59455e-34	7	Cdk6
Ywhah1	2.07046e-38	1.32038	0.715	0.348	3.09554e-34	7	Ywhah
Lig11	3.91205e-38	1.90369	0.462	0.162	5.8489e-34	7	Lig1
Pcna1	8.44293e-38	1.62054	0.707	0.392	1.2623e-33	7	Pcna
Atp5k1	1.03689e-37	1.03674	0.876	0.589	1.55025e-33	7	Atp5k
Lbr	1.0725e-37	1.38495	0.618	0.261	1.6035e-33	7	Lbr
Hsp90aa11	2.02399e-37	0.771445	0.964	0.832	3.02606e-33	7	Hsp90aa1
Slc25a51	2.75641e-37	1.0353	0.88	0.599	4.12111e-33	7	Slc25a5
Tuba1a	3.7687e-37	2.17823	0.478	0.189	5.63458e-33	7	Tuba1a
Tuba4a1	4.49475e-37	1.24695	0.727	0.358	6.7201e-33	7	Tuba4a
Etfb1	8.86802e-37	1.10012	0.839	0.527	1.32586e-32	7	Etfb
Dtymk1	1.6452e-36	1.42296	0.602	0.258	2.45973e-32	7	Dtymk
Lmnb2	2.0653e-36	1.92014	0.309	0.079	3.08783e-32	7	Lmnb2
Rabgap1l1	2.49515e-36	1.44017	0.663	0.33	3.7305e-32	7	Rabgap1l
Snrpd21	6.6727e-36	0.990502	0.892	0.613	9.97636e-32	7	Snrpd2
Nap1l11	7.65621e-36	0.864053	0.92	0.685	1.14468e-31	7	Nap1l1
Pf41	1.7806e-35	2.53879	0.574	0.274	2.66218e-31	7	Pf4
Slfn91	2.43229e-35	2.08542	0.317	0.085	3.63652e-31	7	Slfn9
Banf11	3.05005e-35	1.15388	0.771	0.425	4.56013e-31	7	Banf1
Calm31	4.91953e-35	1.17524	0.755	0.414	7.35518e-31	7	Calm3
Mcm51	5.46028e-35	1.46547	0.498	0.184	8.16366e-31	7	Mcm5
Ndufa41	5.80778e-35	0.829348	0.948	0.75	8.68321e-31	7	Ndufa4
Mcm71	6.75648e-35	1.35376	0.574	0.238	1.01016e-30	7	Mcm7
Ybx11	2.22636e-34	0.882031	0.924	0.649	3.32862e-30	7	Ybx1
Lsm31	2.27769e-34	1.35959	0.61	0.274	3.40537e-30	7	Lsm3
Uqcrq1	2.73357e-34	1.16391	0.767	0.427	4.08696e-30	7	Uqcrq
Ndufb1-ps1	7.3522e-34	0.944917	0.884	0.574	1.09923e-29	7	Ndufb1-ps
Prdx41	6.39872e-33	1.5191	0.506	0.2	9.56673e-29	7	Prdx4
Siva11	9.54873e-33	1.39249	0.618	0.288	1.42763e-28	7	Siva1
Cdca4	1.85002e-32	1.81778	0.353	0.109	2.76596e-28	7	Cdca4
Cycs1	2.4051e-32	1.3443	0.618	0.287	3.59587e-28	7	Cycs
Cdkn2d	2.62702e-32	1.60376	0.426	0.15	3.92765e-28	7	Cdkn2d
Sf3b51	3.73528e-32	1.18774	0.695	0.361	5.58462e-28	7	Sf3b5
Rgs12	3.96349e-32	1.91539	0.285	0.075	5.92582e-28	7	Rgs12
Lsm21	4.78351e-32	1.45338	0.518	0.213	7.15183e-28	7	Lsm2
Micos101	5.05393e-32	0.996797	0.839	0.567	7.55613e-28	7	Micos10
Fen11	7.7409e-32	1.68708	0.341	0.102	1.15734e-27	7	Fen1
Ncaph21	8.518e-32	1.4043	0.522	0.217	1.27353e-27	7	Ncaph2
Nup107	1.2435e-31	1.80194	0.309	0.087	1.85916e-27	7	Nup107
Adgrl11	2.75107e-31	1.94476	0.293	0.081	4.11313e-27	7	Adgrl1
Topbp11	3.00635e-31	1.48601	0.47	0.18	4.4948e-27	7	Topbp1
Calm2	3.19696e-31	0.887691	0.916	0.701	4.77977e-27	7	Calm2
Cox8a	4.20712e-31	0.754495	0.948	0.812	6.29007e-27	7	Cox8a
Ranbp11	4.28935e-31	1.25179	0.707	0.407	6.41301e-27	7	Ranbp1
Rpa21	1.218e-30	1.5322	0.414	0.146	1.82102e-26	7	Rpa2
Snrpe1	2.10829e-30	0.969636	0.819	0.506	3.1521e-26	7	Snrpe
Aqp11	2.19547e-30	1.36688	0.382	0.125	3.28244e-26	7	Aqp1
Pole	2.76556e-30	1.76502	0.309	0.09	4.13479e-26	7	Pole
Fkbp21	3.76154e-30	1.48056	0.458	0.175	5.62388e-26	7	Fkbp2
Cdk41	4.78156e-30	0.958019	0.803	0.476	7.14891e-26	7	Cdk4
Syce21	5.24423e-30	1.56835	0.434	0.162	7.84065e-26	7	Syce2
Snrpg1	5.68937e-30	0.7145	0.94	0.787	8.50618e-26	7	Snrpg
Arl6ip1	7.18813e-30	1.60398	0.643	0.366	1.0747e-25	7	Arl6ip1
Atp5o1	1.06783e-29	0.988339	0.803	0.465	1.59652e-25	7	Atp5o
Fabp51	2.34305e-29	1.48807	0.458	0.178	3.5031e-25	7	Fabp5
Nup851	2.76603e-29	1.50482	0.458	0.181	4.13549e-25	7	Nup85
Anapc51	3.32374e-29	1.10764	0.723	0.395	4.96933e-25	7	Anapc5
Dctpp11	5.38399e-29	1.34472	0.582	0.287	8.04961e-25	7	Dctpp1
Sntg1	6.02032e-29	2.39039	0.305	0.098	9.00098e-25	7	Sntg1
Nudt211	7.06905e-29	1.10648	0.627	0.294	1.05689e-24	7	Nudt21
Snrpb1	8.22436e-29	0.92533	0.839	0.532	1.22962e-24	7	Snrpb
Hnrnpu1	8.88596e-29	0.693454	0.964	0.78	1.32854e-24	7	Hnrnpu
Actg11	1.54591e-28	0.761107	0.948	0.778	2.31129e-24	7	Actg1
Prdx11	2.71636e-28	0.830619	0.871	0.617	4.06124e-24	7	Prdx1
Ndufb92	3.74666e-28	0.934625	0.799	0.48	5.60164e-24	7	Ndufb9
Uqcr101	4.37146e-28	0.983263	0.807	0.516	6.53577e-24	7	Uqcr10
Cox6c1	5.11579e-28	0.734618	0.944	0.779	7.64862e-24	7	Cox6c
Bub3	7.12426e-28	1.40492	0.51	0.225	1.06515e-23	7	Bub3
Fam111a1	9.74587e-28	1.30085	0.478	0.191	1.4571e-23	7	Fam111a
Sumo21	1.14938e-27	0.881473	0.839	0.549	1.71844e-23	7	Sumo2
Ssrp11	1.72691e-27	1.1443	0.731	0.442	2.5819e-23	7	Ssrp1
Hdgf1	2.22152e-27	0.931838	0.775	0.464	3.32139e-23	7	Hdgf
Rhno1	2.59684e-27	1.59553	0.345	0.116	3.88254e-23	7	Rhno1
Srsf11	2.87665e-27	0.995723	0.723	0.422	4.30089e-23	7	Srsf1
Chaf1a1	3.92181e-27	1.89353	0.261	0.073	5.8635e-23	7	Chaf1a
H1f0	4.02258e-27	1.29994	0.578	0.278	6.01416e-23	7	H1f0
Rbl11	4.14321e-27	1.64671	0.333	0.11	6.19451e-23	7	Rbl1
Psip11	4.62377e-27	1.11957	0.643	0.318	6.913e-23	7	Psip1
Actn41	5.99471e-27	1.11491	0.647	0.332	8.9627e-23	7	Actn4
Atp5j21	1.2994e-26	0.788633	0.9	0.682	1.94273e-22	7	Atp5j2
Oaz11	1.4453e-26	0.797381	0.896	0.697	2.16086e-22	7	Oaz1
Atpif11	1.59317e-26	0.694007	0.944	0.79	2.38194e-22	7	Atpif1
Rbbp41	1.68841e-26	0.982879	0.703	0.389	2.52434e-22	7	Rbbp4
Sae11	1.74145e-26	1.08288	0.598	0.289	2.60364e-22	7	Sae1
Hint11	1.97153e-26	0.860457	0.843	0.609	2.94763e-22	7	Hint1
Anp32b1	2.53057e-26	1.00213	0.763	0.481	3.78345e-22	7	Anp32b
Atp5g31	4.71934e-26	0.815169	0.843	0.587	7.05588e-22	7	Atp5g3
Pold11	4.76336e-26	1.41243	0.378	0.136	7.1217e-22	7	Pold1
Nudc1	5.80036e-26	1.1579	0.631	0.333	8.67212e-22	7	Nudc
Rad51b	6.09502e-26	1.81765	0.253	0.071	9.11266e-22	7	Rad51b
Atp5f11	9.29329e-26	0.929317	0.783	0.506	1.38944e-21	7	Atp5f1
Cox5a1	9.83918e-26	1.02181	0.699	0.396	1.47106e-21	7	Cox5a
Atp5g21	1.03898e-25	0.723799	0.9	0.722	1.55338e-21	7	Atp5g2
Aarsd11	1.12782e-25	1.53424	0.341	0.117	1.6862e-21	7	Aarsd1
Ndufb81	2.91922e-25	0.953272	0.751	0.447	4.36453e-21	7	Ndufb8
Gm47371	3.30759e-25	1.52031	0.382	0.144	4.94518e-21	7	Gm4737
Atp5b1	4.26825e-25	0.657641	0.944	0.789	6.38146e-21	7	Atp5b
Prim2	5.77129e-25	1.76823	0.257	0.075	8.62866e-21	7	Prim2
Selenoh1	6.71501e-25	1.39279	0.534	0.257	1.00396e-20	7	Selenoh
Cenpc1	7.5785e-25	1.66387	0.325	0.113	1.13306e-20	7	Cenpc1
Rfc21	9.06885e-25	1.20659	0.542	0.26	1.35588e-20	7	Rfc2
Rpa11	1.3658e-24	1.36082	0.47	0.207	2.042e-20	7	Rpa1
Aaas	1.59643e-24	1.69543	0.253	0.073	2.38683e-20	7	Aaas
Tipin1	1.94848e-24	1.55839	0.357	0.132	2.91317e-20	7	Tipin
Ppih1	6.70175e-24	1.50844	0.365	0.138	1.00198e-19	7	Ppih
Ndufa21	1.11702e-23	0.809879	0.831	0.557	1.67006e-19	7	Ndufa2
Rps27l1	1.41803e-23	0.789211	0.855	0.643	2.12009e-19	7	Rps27l
0610010K14Rik	2.23049e-23	1.30308	0.454	0.199	3.33481e-19	7	0610010K14Rik
Plek1	2.67676e-23	1.3933	0.442	0.195	4.00202e-19	7	Plek
Lsm81	3.10113e-23	1.28202	0.45	0.195	4.6365e-19	7	Lsm8
Lsm61	4.98771e-23	1.2098	0.55	0.286	7.45712e-19	7	Lsm6
Lsm41	8.51105e-23	1.102	0.554	0.275	1.27249e-18	7	Lsm4
AI5068161	8.97285e-23	1.70264	0.285	0.094	1.34153e-18	7	AI506816
Psmb6	1.07681e-22	0.909298	0.715	0.414	1.60994e-18	7	Psmb6
Pbrm1	1.4684e-22	1.11538	0.598	0.308	2.19541e-18	7	Pbrm1
Mdh21	1.53769e-22	0.961224	0.659	0.374	2.299e-18	7	Mdh2
Rbbp8	2.44325e-22	1.65588	0.253	0.078	3.6529e-18	7	Rbbp8
Mis18a	2.64982e-22	1.51987	0.277	0.09	3.96174e-18	7	Mis18a
Nxt11	2.69316e-22	1.60609	0.365	0.146	4.02654e-18	7	Nxt1
Ppp1ca1	2.75159e-22	0.796722	0.787	0.51	4.1139e-18	7	Ppp1ca
Mcm41	2.91031e-22	1.16032	0.422	0.175	4.3512e-18	7	Mcm4
Rap1b1	4.01292e-22	1.45389	0.699	0.49	5.99972e-18	7	Rap1b
Chchd21	4.62783e-22	0.700713	0.863	0.636	6.91906e-18	7	Chchd2
Psmc31	5.86832e-22	0.982067	0.618	0.326	8.77373e-18	7	Psmc3
Exosc81	6.08762e-22	1.33062	0.422	0.182	9.10161e-18	7	Exosc8
Cdt11	7.18837e-22	1.49731	0.329	0.123	1.07473e-17	7	Cdt1
Cox6b21	8.00284e-22	1.41519	0.378	0.152	1.19651e-17	7	Cox6b2
Nme11	1.05051e-21	0.801277	0.783	0.502	1.57062e-17	7	Nme1
Ahcy1	1.64496e-21	1.39073	0.386	0.159	2.45938e-17	7	Ahcy
Atp5md1	2.39198e-21	0.790316	0.819	0.596	3.57625e-17	7	Atp5md
Atp5mpl1	2.65139e-21	0.694257	0.888	0.703	3.9641e-17	7	Atp5mpl
Xpo11	2.75397e-21	1.18928	0.478	0.226	4.11746e-17	7	Xpo1
Nasp1	4.69961e-21	1.28452	0.349	0.134	7.02638e-17	7	Nasp
Ctcf	5.53759e-21	1.09989	0.526	0.265	8.27924e-17	7	Ctcf
Pola21	5.75625e-21	1.59382	0.285	0.099	8.60616e-17	7	Pola2
Hnrnpf1	6.40197e-21	0.679015	0.851	0.613	9.57158e-17	7	Hnrnpf
Tmem2561	1.14841e-20	0.870176	0.723	0.437	1.71699e-16	7	Tmem256
Atp5e1	1.1663e-20	0.686021	0.871	0.664	1.74373e-16	7	Atp5e
Cox5b1	1.43305e-20	0.911449	0.715	0.472	2.14256e-16	7	Cox5b
Uba21	1.44637e-20	1.2959	0.414	0.183	2.16247e-16	7	Uba2
Rdm1	1.58608e-20	1.66652	0.353	0.146	2.37135e-16	7	Rdm1
Rfwd3	1.58673e-20	1.41191	0.321	0.121	2.37231e-16	7	Rfwd3
Mrpl331	1.71641e-20	0.883	0.727	0.446	2.56621e-16	7	Mrpl33
Mcm61	2.25844e-20	0.996355	0.606	0.34	3.37659e-16	7	Mcm6
Cep295	2.69028e-20	1.42275	0.325	0.124	4.02224e-16	7	Cep295
Tmem14c1	2.91705e-20	0.901704	0.55	0.276	4.36128e-16	7	Tmem14c
Ptges31	3.54795e-20	0.775976	0.787	0.523	5.30453e-16	7	Ptges3
Cenpx1	3.54799e-20	1.13169	0.49	0.243	5.3046e-16	7	Cenpx
Cad1	3.97501e-20	1.36972	0.357	0.146	5.94304e-16	7	Cad
Ncapd3	4.02292e-20	1.5733	0.257	0.085	6.01467e-16	7	Ncapd3
Psmd131	4.37923e-20	0.951195	0.59	0.318	6.54739e-16	7	Psmd13
Arpp191	6.64491e-20	0.800368	0.683	0.395	9.93481e-16	7	Arpp19
Lgals91	7.38454e-20	0.894342	0.647	0.374	1.10406e-15	7	Lgals9
2024-09-11	7.49558e-20	1.36521	0.329	0.128	1.12066e-15	7	2024-09-11
Pdcd41	8.07032e-20	1.34214	0.594	0.381	1.20659e-15	7	Pdcd4
Tfdp11	8.67686e-20	1.14376	0.466	0.223	1.29728e-15	7	Tfdp1
Cox7b1	9.44064e-20	0.692974	0.859	0.618	1.41147e-15	7	Cox7b
Cbx11	1.05701e-19	0.992195	0.606	0.345	1.58033e-15	7	Cbx1
Ipo51	1.1076e-19	1.01189	0.538	0.281	1.65597e-15	7	Ipo5
Ndufb71	1.20569e-19	0.819661	0.695	0.418	1.80263e-15	7	Ndufb7
Atp5h1	1.67569e-19	0.724478	0.815	0.589	2.50532e-15	7	Atp5h
Atp5j1	1.70884e-19	0.753301	0.831	0.632	2.55489e-15	7	Atp5j
Hnrnpd1	2.09697e-19	0.89931	0.655	0.395	3.13518e-15	7	Hnrnpd
Mlec1	2.44019e-19	0.913814	0.61	0.334	3.64833e-15	7	Mlec
Hmgn5	2.53382e-19	1.23405	0.365	0.152	3.78832e-15	7	Hmgn5
Fh11	2.7113e-19	1.06542	0.442	0.202	4.05367e-15	7	Fh1
Csrp11	4.16647e-19	1.33124	0.361	0.153	6.22928e-15	7	Csrp1
Gpx41	4.27097e-19	0.625404	0.896	0.669	6.38553e-15	7	Gpx4
Elob1	4.77436e-19	0.657834	0.843	0.625	7.13814e-15	7	Elob
Nup621	6.91649e-19	1.36909	0.329	0.132	1.03408e-14	7	Nup62
Ndufa31	8.50412e-19	0.70338	0.827	0.582	1.27145e-14	7	Ndufa3
Hspa141	8.9172e-19	1.16545	0.406	0.182	1.33321e-14	7	Hspa14
Rnaseh2b1	9.07445e-19	1.56338	0.277	0.102	1.35672e-14	7	Rnaseh2b
Nmral1	9.47871e-19	1.48279	0.261	0.091	1.41716e-14	7	Nmral1
Hpf11	1.40287e-18	1.15411	0.422	0.197	2.09743e-14	7	Hpf1
Psmb31	1.64732e-18	0.839749	0.663	0.398	2.4629e-14	7	Psmb3
Ptbp3	1.77023e-18	0.893869	0.679	0.438	2.64667e-14	7	Ptbp3
Snrpc1	1.78415e-18	1.06176	0.486	0.247	2.66749e-14	7	Snrpc
Cntln1	1.9031e-18	1.36883	0.394	0.179	2.84532e-14	7	Cntln
Gapdh1	2.20873e-18	0.590205	0.863	0.665	3.30227e-14	7	Gapdh
Dck	2.56342e-18	1.45387	0.273	0.099	3.83257e-14	7	Dck
Hnrnpl1	3.22648e-18	0.807322	0.711	0.454	4.82391e-14	7	Hnrnpl
Gm10076	3.76439e-18	1.4081	0.289	0.109	5.62814e-14	7	Gm10076
Cmtm71	4.46583e-18	0.755116	0.779	0.558	6.67686e-14	7	Cmtm7
Snrpd31	4.86028e-18	0.728542	0.739	0.49	7.26661e-14	7	Snrpd3
Magoh1	4.98574e-18	1.02435	0.57	0.333	7.45418e-14	7	Magoh
Mrpl181	5.57781e-18	1.145	0.43	0.206	8.33939e-14	7	Mrpl18
Ptbp11	6.44844e-18	0.895948	0.627	0.394	9.64107e-14	7	Ptbp1
Erh1	7.15282e-18	0.988604	0.55	0.301	1.06942e-13	7	Erh
Ssb1	7.57562e-18	0.716954	0.739	0.486	1.13263e-13	7	Ssb
Mapre1	8.75573e-18	0.860448	0.582	0.322	1.30907e-13	7	Mapre1
Ndufv21	9.2369e-18	0.839165	0.582	0.32	1.38101e-13	7	Ndufv2
Uqcc21	1.02335e-17	0.980146	0.61	0.373	1.53001e-13	7	Uqcc2
Srsf41	1.03893e-17	1.08551	0.438	0.211	1.55331e-13	7	Srsf4
Nutf2-ps11	1.21411e-17	1.12689	0.446	0.219	1.81522e-13	7	Nutf2-ps1
Srsf21	1.43675e-17	0.711403	0.779	0.524	2.14809e-13	7	Srsf2
Cox6b11	1.4475e-17	0.674046	0.831	0.625	2.16416e-13	7	Cox6b1
Lsm51	1.51395e-17	0.984764	0.534	0.292	2.26351e-13	7	Lsm5
Tardbp1	1.51604e-17	0.773458	0.703	0.439	2.26662e-13	7	Tardbp
Snrnp25	1.5455e-17	1.34647	0.333	0.141	2.31068e-13	7	Snrnp25
Cxcr4	1.61814e-17	1.10192	0.345	0.144	2.41929e-13	7	Cxcr4
Ddx391	2.1259e-17	1.18782	0.357	0.154	3.17843e-13	7	Ddx39
Ywhaq1	2.37821e-17	0.738845	0.727	0.451	3.55566e-13	7	Ywhaq
Serpinb1a	2.40837e-17	0.876826	0.301	0.116	3.60075e-13	7	Serpinb1a
Nsmce1	3.31422e-17	1.17403	0.414	0.199	4.95509e-13	7	Nsmce1
Nudcd2	4.08287e-17	1.30112	0.305	0.123	6.10429e-13	7	Nudcd2
H2-Q72	4.23303e-17	0.632539	0.819	0.603	6.3288e-13	7	H2-Q7
Ak21	5.43023e-17	0.882531	0.61	0.354	8.11873e-13	7	Ak2
Ssna1	5.55704e-17	1.10395	0.45	0.227	8.30833e-13	7	Ssna1
Rbm8a1	6.5083e-17	0.885513	0.655	0.422	9.73056e-13	7	Rbm8a
Sfpq1	6.92727e-17	0.705011	0.787	0.563	1.0357e-12	7	Sfpq
Eif4a31	7.75546e-17	0.956477	0.518	0.282	1.15952e-12	7	Eif4a3
Calm11	7.94067e-17	0.53684	0.904	0.702	1.18721e-12	7	Calm1
Cfl11	8.85651e-17	0.50355	0.916	0.753	1.32414e-12	7	Cfl1
Nsd2	1.36985e-16	0.957569	0.482	0.247	2.04807e-12	7	Nsd2
Paxip1	1.52964e-16	1.28225	0.277	0.107	2.28696e-12	7	Paxip1
Hnrnpul1	1.68575e-16	0.946585	0.53	0.296	2.52036e-12	7	Hnrnpul1
Mrpl421	1.86177e-16	0.905674	0.566	0.317	2.78353e-12	7	Mrpl42
Orc61	1.9408e-16	1.35996	0.281	0.111	2.90169e-12	7	Orc6
Cntrl	2.00316e-16	1.15966	0.386	0.179	2.99493e-12	7	Cntrl
Rbbp71	4.03865e-16	0.807396	0.675	0.426	6.03818e-12	7	Rbbp7
AU020206	4.45203e-16	1.42839	0.269	0.105	6.65623e-12	7	AU020206
Galk11	4.58731e-16	1.13901	0.402	0.191	6.85849e-12	7	Galk1
Uchl51	4.63376e-16	1.06862	0.438	0.218	6.92793e-12	7	Uchl5
F2r1	4.90528e-16	1.30321	0.353	0.163	7.33389e-12	7	F2r
Diaph3	4.9602e-16	1.06756	0.406	0.194	7.416e-12	7	Diaph3
Pold21	5.13412e-16	1.30179	0.305	0.127	7.67602e-12	7	Pold2
Mcm21	5.60309e-16	1.00514	0.414	0.196	8.37717e-12	7	Mcm2
Ppp1cc	5.73289e-16	0.812896	0.61	0.359	8.57125e-12	7	Ppp1cc
Nup133	6.05111e-16	1.33232	0.261	0.099	9.04702e-12	7	Nup133
Abracl1	6.38462e-16	0.86485	0.578	0.344	9.54564e-12	7	Abracl
Srsf71	7.04109e-16	0.688229	0.727	0.485	1.05271e-11	7	Srsf7
Nup205	8.22644e-16	1.31139	0.269	0.105	1.22994e-11	7	Nup205
Ndufab11	8.67667e-16	0.851262	0.566	0.323	1.29725e-11	7	Ndufab1
Nedd82	8.77062e-16	0.801441	0.651	0.42	1.31129e-11	7	Nedd8
Vrk11	8.84063e-16	1.08469	0.353	0.158	1.32176e-11	7	Vrk1
Nelfe1	1.17849e-15	1.26973	0.309	0.131	1.76196e-11	7	Nelfe
Gm87971	1.25047e-15	0.730685	0.795	0.662	1.86957e-11	7	Gm8797
Ndufc22	1.33698e-15	0.710276	0.691	0.469	1.99892e-11	7	Ndufc2
Ctc1	1.36265e-15	1.3907	0.257	0.099	2.03729e-11	7	Ctc1
Smc61	1.43566e-15	0.939984	0.438	0.218	2.14646e-11	7	Smc6
Cbfb1	1.55793e-15	0.922981	0.494	0.261	2.32926e-11	7	Cbfb
Cdk5rap2	1.86731e-15	1.16282	0.341	0.153	2.79182e-11	7	Cdk5rap2
Eif5a1	2.22556e-15	0.482857	0.948	0.834	3.32743e-11	7	Eif5a
Fmc11	2.39646e-15	0.877102	0.59	0.363	3.58295e-11	7	Fmc1
Il31ra	2.60761e-15	2.01721	0.454	0.333	3.89864e-11	7	Il31ra
Snu131	3.07883e-15	0.714567	0.663	0.411	4.60316e-11	7	Snu13
Hsp90b11	3.16664e-15	0.735024	0.755	0.563	4.73445e-11	7	Hsp90b1
H2afj1	3.22347e-15	0.833165	0.598	0.358	4.81942e-11	7	H2afj
Actl6a1	3.39265e-15	1.12414	0.325	0.141	5.07235e-11	7	Actl6a
Mrpl121	3.99209e-15	0.899686	0.482	0.256	5.96858e-11	7	Mrpl12
Dtnbp11	4.25872e-15	1.00045	0.45	0.235	6.36721e-11	7	Dtnbp1
Ndufb21	4.42551e-15	0.706513	0.703	0.47	6.61659e-11	7	Ndufb2
Atp5g11	6.85119e-15	0.67762	0.747	0.5	1.02432e-10	7	Atp5g1
Vdac31	7.02897e-15	0.886677	0.51	0.284	1.0509e-10	7	Vdac3
Clic4	7.8809e-15	1.04363	0.394	0.194	1.17827e-10	7	Clic4
Cox171	8.05027e-15	0.753482	0.691	0.463	1.2036e-10	7	Cox17
AI6622701	8.92072e-15	0.988969	0.41	0.202	1.33374e-10	7	AI662270
Atp5d1	1.11933e-14	0.665715	0.663	0.417	1.67352e-10	7	Atp5d
Hp1bp3	1.15748e-14	0.843978	0.631	0.416	1.73056e-10	7	Hp1bp3
Mrps141	1.2542e-14	0.855395	0.542	0.314	1.87515e-10	7	Mrps14
Psma61	1.32929e-14	0.755867	0.627	0.397	1.98741e-10	7	Psma6
Nfyb	1.70612e-14	1.25085	0.285	0.12	2.55082e-10	7	Nfyb
Pa2g41	1.90708e-14	0.737153	0.671	0.436	2.85128e-10	7	Pa2g4
Ubc	2.06899e-14	0.677583	0.751	0.533	3.09335e-10	7	Ubc
Ddx39b1	2.10345e-14	0.735761	0.687	0.456	3.14486e-10	7	Ddx39b
Eny21	2.13819e-14	0.91795	0.51	0.295	3.19681e-10	7	Eny2
Fzr1	2.27497e-14	1.31842	0.277	0.116	3.40131e-10	7	Fzr1
Ndufa51	2.3036e-14	0.813211	0.627	0.402	3.44412e-10	7	Ndufa5
Pgk11	2.43489e-14	0.709137	0.675	0.437	3.64041e-10	7	Pgk1
C1galt11	2.96361e-14	1.31364	0.293	0.129	4.43089e-10	7	C1galt1
Smarca51	3.04354e-14	0.861769	0.57	0.347	4.55039e-10	7	Smarca5
Odc11	3.66081e-14	0.857189	0.53	0.311	5.47327e-10	7	Odc1
Dnajc191	3.78208e-14	0.923936	0.446	0.236	5.65459e-10	7	Dnajc19
Sf3b61	4.12322e-14	0.627283	0.739	0.482	6.16462e-10	7	Sf3b6
Dpy301	4.13448e-14	0.901875	0.49	0.274	6.18146e-10	7	Dpy30
Elof11	4.13906e-14	1.18944	0.337	0.159	6.1883e-10	7	Elof1
Hells1	5.2431e-14	1.22856	0.257	0.104	7.83895e-10	7	Hells
Mrps11	5.88532e-14	1.22695	0.281	0.12	8.79914e-10	7	Mrps11
Ppif1	6.31101e-14	0.936041	0.418	0.213	9.43559e-10	7	Ppif
Mrpl51	6.86943e-14	0.913231	0.478	0.267	1.02705e-09	7	Mrpl51
Hmgn11	7.10283e-14	0.81944	0.635	0.432	1.06194e-09	7	Hmgn1
Purb1	7.73669e-14	0.782906	0.594	0.366	1.15671e-09	7	Purb
Nsmce4a1	7.99943e-14	0.991852	0.365	0.176	1.196e-09	7	Nsmce4a
Zfp3671	1.09424e-13	1.26375	0.277	0.119	1.63599e-09	7	Zfp367
Naa501	1.31797e-13	0.906399	0.506	0.3	1.97049e-09	7	Naa50
Swi51	1.40717e-13	0.628477	0.747	0.507	2.10385e-09	7	Swi5
Uqcrb1	1.49367e-13	0.613187	0.755	0.553	2.23318e-09	7	Uqcrb
Haus41	1.50431e-13	1.0725	0.317	0.144	2.2491e-09	7	Haus4
Ubald2	1.52495e-13	1.06445	0.49	0.293	2.27995e-09	7	Ubald2
Ppp4c	1.65281e-13	0.993632	0.426	0.223	2.47111e-09	7	Ppp4c
Actr3	1.84471e-13	0.706297	0.598	0.374	2.75802e-09	7	Actr3
Atl2	1.90758e-13	1.20863	0.273	0.117	2.85202e-09	7	Atl2
Nop561	1.93035e-13	0.793995	0.631	0.416	2.88607e-09	7	Nop56
Parp11	2.07424e-13	1.03792	0.426	0.23	3.10119e-09	7	Parp1
Cdk2ap11	2.127e-13	0.948172	0.406	0.21	3.18008e-09	7	Cdk2ap1
Ddost	2.1869e-13	0.772421	0.542	0.317	3.26963e-09	7	Ddost
Cd91	2.43154e-13	0.770733	0.614	0.418	3.6354e-09	7	Cd9
Set1	2.52448e-13	0.544781	0.843	0.644	3.77435e-09	7	Set
Eri11	2.54178e-13	1.12921	0.329	0.156	3.80022e-09	7	Eri1
Lims11	2.88699e-13	1.05929	0.454	0.258	4.31634e-09	7	Lims1
Gm10282	3.02141e-13	1.10074	0.534	0.4	4.51731e-09	7	Gm10282
Dot1l	3.07197e-13	1.14394	0.281	0.122	4.5929e-09	7	Dot1l
Suz121	3.13796e-13	1.0479	0.386	0.2	4.69156e-09	7	Suz12
Smc31	3.24802e-13	0.84431	0.502	0.297	4.85611e-09	7	Smc3
Ndufb31	3.70724e-13	0.664095	0.606	0.366	5.5427e-09	7	Ndufb3
Sod11	3.90184e-13	0.475847	0.9	0.714	5.83364e-09	7	Sod1
Impdh21	4.45789e-13	0.581103	0.803	0.647	6.665e-09	7	Impdh2
Eif4a11	4.92168e-13	0.489848	0.851	0.687	7.3584e-09	7	Eif4a1
Mrps18c1	5.08044e-13	0.858152	0.49	0.285	7.59577e-09	7	Mrps18c
Prelid1	5.4125e-13	0.693255	0.546	0.318	8.09223e-09	7	Prelid1
Ssr11	5.62679e-13	0.776834	0.566	0.349	8.41262e-09	7	Ssr1
Pbdc11	6.71232e-13	0.972487	0.382	0.195	1.00356e-08	7	Pbdc1
Rbx11	7.41319e-13	0.636877	0.723	0.523	1.10835e-08	7	Rbx1
Tmsb101	7.86625e-13	0.525978	0.663	0.432	1.17608e-08	7	Tmsb10
Pih1d1	8.12033e-13	1.0119	0.361	0.181	1.21407e-08	7	Pih1d1
Bcl2	8.87414e-13	0.820376	0.534	0.32	1.32677e-08	7	Bcl2
Ipo91	9.25363e-13	1.01639	0.345	0.169	1.38351e-08	7	Ipo9
Psmb71	1.0298e-12	0.912213	0.47	0.274	1.53965e-08	7	Psmb7
Anapc132	1.09627e-12	0.673783	0.627	0.393	1.63903e-08	7	Anapc13
Psmb21	1.26263e-12	0.598637	0.651	0.415	1.88776e-08	7	Psmb2
Hat11	1.49967e-12	1.0277	0.353	0.178	2.24216e-08	7	Hat1
Uqcr111	1.57243e-12	0.573764	0.827	0.639	2.35094e-08	7	Uqcr11
Xist1	1.59767e-12	0.687487	0.498	0.284	2.38867e-08	7	Xist
Rpn11	1.72544e-12	0.801579	0.518	0.311	2.57971e-08	7	Rpn1
Ndufs61	1.81683e-12	0.730503	0.57	0.353	2.71634e-08	7	Ndufs6
Cdkn2aipnl	1.8607e-12	0.931909	0.394	0.207	2.78194e-08	7	Cdkn2aipnl
Snrpa11	1.92103e-12	0.891641	0.373	0.189	2.87213e-08	7	Snrpa1
Timm501	2.13804e-12	1.04377	0.289	0.131	3.19658e-08	7	Timm50
Pold3	2.31936e-12	1.16345	0.261	0.113	3.46768e-08	7	Pold3
Ndufc11	2.3842e-12	0.6709	0.639	0.414	3.56461e-08	7	Ndufc1
Ppm1g1	2.52114e-12	1.06555	0.382	0.205	3.76935e-08	7	Ppm1g
Nono1	2.75323e-12	0.640411	0.631	0.399	4.11635e-08	7	Nono
Cpsf21	2.90632e-12	0.86368	0.402	0.212	4.34524e-08	7	Cpsf2
Gnb21	2.92826e-12	0.762432	0.578	0.367	4.37805e-08	7	Gnb2
Cct71	2.96095e-12	0.699703	0.679	0.484	4.42691e-08	7	Cct7
Cse1l1	3.01496e-12	0.985391	0.365	0.187	4.50766e-08	7	Cse1l
Mcm31	3.19269e-12	0.824999	0.47	0.268	4.77338e-08	7	Mcm3
Ndufs5	3.34507e-12	0.830989	0.478	0.282	5.00121e-08	7	Ndufs5
Mrpl281	3.39248e-12	0.977545	0.394	0.207	5.0721e-08	7	Mrpl28
Psmc1	3.45998e-12	0.772989	0.558	0.35	5.17301e-08	7	Psmc1
Kpnb11	3.47498e-12	0.747908	0.554	0.345	5.19544e-08	7	Kpnb1
Mrpl201	5.02928e-12	0.862504	0.434	0.242	7.51927e-08	7	Mrpl20
Aars1	5.04605e-12	1.04688	0.301	0.142	7.54435e-08	7	Aars
Atp5c11	5.34546e-12	0.590573	0.755	0.541	7.992e-08	7	Atp5c1
Stip11	5.73441e-12	0.93549	0.446	0.257	8.57351e-08	7	Stip1
Sp3	5.89439e-12	0.822511	0.394	0.204	8.8127e-08	7	Sp3
Rcc11	6.11372e-12	1.0494	0.297	0.139	9.14062e-08	7	Rcc1
Acat11	6.31609e-12	0.821345	0.462	0.265	9.44319e-08	7	Acat1
Nop101	6.89128e-12	0.505115	0.871	0.71	1.03032e-07	7	Nop10
Nme21	7.36238e-12	0.524065	0.835	0.678	1.10075e-07	7	Nme2
Arpc4	7.64382e-12	0.682774	0.554	0.342	1.14283e-07	7	Arpc4
Mrps17	7.75349e-12	0.829476	0.41	0.22	1.15922e-07	7	Mrps17
Mars	8.12189e-12	1.1571	0.261	0.116	1.2143e-07	7	Mars
Smarcc11	8.36946e-12	0.825597	0.482	0.283	1.25132e-07	7	Smarcc1
Brd8	8.41873e-12	0.955962	0.365	0.19	1.25868e-07	7	Brd8
Dnph11	8.49658e-12	1.11244	0.257	0.113	1.27032e-07	7	Dnph1
Tmco11	9.5617e-12	0.65399	0.614	0.399	1.42957e-07	7	Tmco1
Rex1bd1	9.58712e-12	0.875851	0.466	0.277	1.43337e-07	7	Rex1bd
Bex31	9.72534e-12	0.750532	0.546	0.34	1.45403e-07	7	Bex3
Atp5l	1.00759e-11	0.426661	0.904	0.795	1.50645e-07	7	Atp5l
Tcp11	1.03333e-11	0.676966	0.627	0.419	1.54493e-07	7	Tcp1
Dbi2	1.08508e-11	0.624642	0.647	0.424	1.62231e-07	7	Dbi
Paics1	1.11117e-11	0.67177	0.602	0.395	1.66131e-07	7	Paics
Chchd11	1.12497e-11	0.748333	0.514	0.308	1.68194e-07	7	Chchd1
Lyar1	1.16066e-11	0.897867	0.382	0.204	1.7353e-07	7	Lyar
Supt161	1.17246e-11	0.838821	0.458	0.262	1.75295e-07	7	Supt16
Psmb51	1.26057e-11	0.690449	0.582	0.368	1.88468e-07	7	Psmb5
Trim281	1.27671e-11	0.654336	0.614	0.404	1.90881e-07	7	Trim28
Ndufb51	1.31755e-11	0.623365	0.59	0.375	1.96987e-07	7	Ndufb5
Ptms	1.39126e-11	1.31261	0.277	0.133	2.08008e-07	7	Ptms
Cmpk1	1.48805e-11	0.789261	0.458	0.262	2.22478e-07	7	Cmpk1
Dpm32	1.5036e-11	0.608609	0.651	0.45	2.24803e-07	7	Dpm3
Elavl1	1.54715e-11	0.71121	0.502	0.293	2.31315e-07	7	Elavl1
Nhp21	1.58442e-11	0.783695	0.546	0.349	2.36886e-07	7	Nhp2
Etfa1	1.62341e-11	0.799434	0.426	0.234	2.42716e-07	7	Etfa
Rbis2	1.62763e-11	0.599642	0.582	0.356	2.43347e-07	7	Rbis
Ap2s1	1.70289e-11	0.619425	0.558	0.337	2.54599e-07	7	Ap2s1
Nup2101	1.72145e-11	0.654466	0.51	0.296	2.57374e-07	7	Nup210
Fkbp31	1.75617e-11	0.620228	0.622	0.392	2.62565e-07	7	Fkbp3
Cdc1231	1.88933e-11	0.960799	0.39	0.216	2.82474e-07	7	Cdc123
Tgfb11	2.04483e-11	1.09239	0.269	0.124	3.05722e-07	7	Tgfb1
Cdca71	2.74146e-11	0.774886	0.434	0.244	4.09875e-07	7	Cdca7
Larp7	2.80421e-11	0.787222	0.494	0.298	4.19257e-07	7	Larp7
Psma21	2.93009e-11	0.602601	0.659	0.452	4.38078e-07	7	Psma2
Nans1	3.17063e-11	1.034	0.301	0.147	4.7404e-07	7	Nans
Mrpl141	3.17386e-11	0.847555	0.446	0.262	4.74524e-07	7	Mrpl14
Sumo31	3.33791e-11	0.736114	0.514	0.318	4.99052e-07	7	Sumo3
Ybx31	4.37479e-11	0.601171	0.663	0.446	6.54075e-07	7	Ybx3
Psmg21	4.79951e-11	0.989915	0.305	0.149	7.17575e-07	7	Psmg2
Pom121	5.09407e-11	0.916191	0.365	0.194	7.61614e-07	7	Pom121
Pole31	5.26942e-11	0.819586	0.333	0.167	7.87832e-07	7	Pole3
Smarca4	5.40826e-11	0.722038	0.474	0.279	8.08588e-07	7	Smarca4
Ndufa121	5.4816e-11	0.573105	0.643	0.434	8.19555e-07	7	Ndufa12
Rnps1	5.64277e-11	0.761908	0.49	0.302	8.4365e-07	7	Rnps1
Slc14a11	5.92613e-11	1.03152	0.378	0.21	8.86016e-07	7	Slc14a1
Ywhae	7.52004e-11	0.53121	0.747	0.55	1.12432e-06	7	Ywhae
Rhoa	8.03705e-11	0.550367	0.659	0.447	1.20162e-06	7	Rhoa
Idh21	8.21112e-11	0.86085	0.462	0.28	1.22764e-06	7	Idh2
Cnot91	8.49976e-11	0.962118	0.293	0.142	1.2708e-06	7	Cnot9
Sla	8.65769e-11	1.15794	0.277	0.133	1.29441e-06	7	Sla
Kat7	9.1013e-11	0.994907	0.293	0.143	1.36074e-06	7	Kat7
Grpel11	9.90335e-11	0.958114	0.325	0.168	1.48065e-06	7	Grpel1
Baz1b1	1.07937e-10	0.683313	0.482	0.288	1.61377e-06	7	Baz1b
Idh3a1	1.1248e-10	0.793995	0.357	0.188	1.68169e-06	7	Idh3a
Usp502	1.12816e-10	0.69875	0.55	0.359	1.68672e-06	7	Usp50
U2af11	1.15535e-10	0.666862	0.594	0.4	1.72736e-06	7	U2af1
Cavin2	1.16421e-10	0.708839	0.546	0.347	1.74061e-06	7	Cavin2
Bckdk1	1.28473e-10	0.956052	0.329	0.17	1.9208e-06	7	Bckdk
Eif1ax1	1.30163e-10	0.658856	0.49	0.291	1.94607e-06	7	Eif1ax
Smdt1	1.34009e-10	0.611527	0.558	0.349	2.00357e-06	7	Smdt1
Cep83	1.70978e-10	1.0329	0.285	0.138	2.5563e-06	7	Cep83
Pcnt	1.80187e-10	0.948873	0.317	0.162	2.69398e-06	7	Pcnt
Rer1	1.91534e-10	0.858535	0.458	0.28	2.86363e-06	7	Rer1
Osgep	1.93368e-10	0.918842	0.361	0.199	2.89104e-06	7	Osgep
Mogs1	2.24358e-10	0.838898	0.398	0.223	3.35437e-06	7	Mogs
Unc1191	2.28446e-10	0.960456	0.333	0.176	3.4155e-06	7	Unc119
Mapk11	2.29644e-10	0.666367	0.546	0.351	3.4334e-06	7	Mapk1
Psma71	2.33581e-10	0.494559	0.791	0.596	3.49226e-06	7	Psma7
Fkbp41	2.55576e-10	0.755698	0.49	0.308	3.82112e-06	7	Fkbp4
Polr3k1	2.57492e-10	0.965047	0.325	0.171	3.84976e-06	7	Polr3k
Timm8a11	3.05233e-10	0.930231	0.313	0.161	4.56354e-06	7	Timm8a1
Cetn2	3.06597e-10	0.722027	0.418	0.234	4.58394e-06	7	Cetn2
Mrpl131	3.35322e-10	0.718307	0.478	0.29	5.01341e-06	7	Mrpl13
Sec11c	3.48861e-10	0.648797	0.526	0.331	5.21582e-06	7	Sec11c
Ube2l3	3.4938e-10	0.609089	0.55	0.343	5.22358e-06	7	Ube2l3
Timm17b	3.61951e-10	0.97935	0.317	0.165	5.41153e-06	7	Timm17b
Gtf2a2	3.65188e-10	0.857947	0.398	0.228	5.45993e-06	7	Gtf2a2
Rtn31	3.90563e-10	0.648679	0.522	0.332	5.83931e-06	7	Rtn3
Eloc1	4.36513e-10	0.745789	0.474	0.294	6.52631e-06	7	Eloc
Hnrnpdl1	4.39879e-10	0.706505	0.554	0.378	6.57663e-06	7	Hnrnpdl
Mrps251	5.0116e-10	0.872262	0.345	0.186	7.49284e-06	7	Mrps25
Kdelr21	5.28362e-10	0.845884	0.386	0.219	7.89954e-06	7	Kdelr2
Erg281	5.58552e-10	0.921069	0.341	0.185	8.35091e-06	7	Erg28
Pfdn61	5.91309e-10	0.85752	0.402	0.236	8.84066e-06	7	Pfdn6
Cep192	6.42286e-10	0.998926	0.261	0.125	9.60281e-06	7	Cep192
Tomm71	6.6887e-10	0.441229	0.851	0.666	1.00003e-05	7	Tomm7
Ppp2r5c	7.38689e-10	0.715363	0.494	0.312	1.10441e-05	7	Ppp2r5c
Syncrip1	8.66968e-10	0.649654	0.534	0.345	1.2962e-05	7	Syncrip
Pck2	1.04161e-09	0.755106	0.402	0.23	1.55731e-05	7	Pck2
Tbcb1	1.14245e-09	0.840419	0.382	0.216	1.70808e-05	7	Tbcb
Psmd81	1.19486e-09	0.735798	0.466	0.286	1.78643e-05	7	Psmd8
Rpn21	1.24485e-09	0.54602	0.606	0.41	1.86117e-05	7	Rpn2
Hikeshi	1.30426e-09	0.924241	0.285	0.144	1.95e-05	7	Hikeshi
Fam216a	1.33708e-09	1.00528	0.253	0.121	1.99907e-05	7	Fam216a
Bola22	1.34662e-09	0.529779	0.719	0.532	2.01334e-05	7	Bola2
Prpf38a	1.36681e-09	1.04343	0.265	0.131	2.04352e-05	7	Prpf38a
Sf3b21	1.41419e-09	0.622341	0.57	0.393	2.11436e-05	7	Sf3b2
Hspe11	1.42148e-09	0.471388	0.739	0.561	2.12525e-05	7	Hspe1
Stk16	1.4919e-09	0.839931	0.378	0.214	2.23054e-05	7	Stk16
Smchd1	1.56965e-09	0.743954	0.43	0.258	2.34679e-05	7	Smchd1
Uqcrc11	1.66898e-09	0.656725	0.534	0.349	2.4953e-05	7	Uqcrc1
Hcfc1	1.67672e-09	0.891511	0.337	0.185	2.50687e-05	7	Hcfc1
Tmed21	1.69008e-09	0.563297	0.582	0.384	2.52683e-05	7	Tmed2
Tra2b1	1.75713e-09	0.476074	0.711	0.522	2.62709e-05	7	Tra2b
Timm231	1.79575e-09	0.837014	0.378	0.215	2.68483e-05	7	Timm23
Stub11	1.84891e-09	0.829328	0.394	0.23	2.7643e-05	7	Stub1
Gars1	1.85341e-09	0.803734	0.369	0.207	2.77103e-05	7	Gars
Ciao2a1	1.94861e-09	0.697395	0.434	0.258	2.91336e-05	7	Ciao2a
Ndufa14	2.02726e-09	0.510601	0.61	0.407	3.03096e-05	7	Ndufa1
Coro1c	2.04514e-09	0.902054	0.325	0.176	3.05769e-05	7	Coro1c
Odf2	2.08725e-09	0.938577	0.281	0.143	3.12064e-05	7	Odf2
Dazap1	2.14229e-09	0.855099	0.398	0.232	3.20294e-05	7	Dazap1
Rfc11	2.2173e-09	0.814961	0.402	0.242	3.31508e-05	7	Rfc1
Hspa4l	2.23881e-09	0.854338	0.301	0.155	3.34725e-05	7	Hspa4l
Bloc1s5	2.33643e-09	1.03938	0.386	0.234	3.4932e-05	7	Bloc1s5
Dhx91	2.38537e-09	0.64826	0.462	0.28	3.56637e-05	7	Dhx9
Ndufs81	2.40714e-09	0.696356	0.474	0.301	3.59891e-05	7	Ndufs8
Larp4b1	2.41533e-09	0.552184	0.546	0.347	3.61116e-05	7	Larp4b
Thoc71	2.60237e-09	0.65482	0.53	0.346	3.8908e-05	7	Thoc7
Bola11	2.71393e-09	0.84949	0.337	0.186	4.0576e-05	7	Bola1
Tram11	2.90788e-09	0.703593	0.53	0.364	4.34758e-05	7	Tram1
Eif4e1	3.12055e-09	0.743114	0.418	0.25	4.66554e-05	7	Eif4e
Ncbp11	3.16791e-09	0.899828	0.297	0.155	4.73635e-05	7	Ncbp1
Ndufb61	3.25953e-09	0.656163	0.446	0.27	4.87333e-05	7	Ndufb6
Atf1	3.52226e-09	0.884001	0.333	0.183	5.26613e-05	7	Atf1
Eif4h	4.27097e-09	0.527056	0.639	0.455	6.38553e-05	7	Eif4h
Park72	4.4832e-09	0.578062	0.659	0.486	6.70283e-05	7	Park7
Ewsr11	4.69235e-09	0.477527	0.671	0.464	7.01554e-05	7	Ewsr1
Sem11	4.76075e-09	0.364332	0.88	0.778	7.11779e-05	7	Sem1
Eif1ad1	5.07621e-09	0.947369	0.273	0.14	7.58944e-05	7	Eif1ad
Sec61g1	5.21635e-09	0.462339	0.799	0.634	7.79897e-05	7	Sec61g
Ormdl2	5.22181e-09	0.936984	0.253	0.124	7.80713e-05	7	Ormdl2
Uchl31	5.34662e-09	0.914716	0.317	0.174	7.99373e-05	7	Uchl3
Psme31	5.76109e-09	0.777625	0.365	0.21	8.61341e-05	7	Psme3
Tmem1231	5.796e-09	0.769057	0.41	0.25	8.6656e-05	7	Tmem123
G3bp11	6.81203e-09	0.47166	0.735	0.563	0.000101847	7	G3bp1
Psmb41	7.01153e-09	0.455643	0.707	0.518	0.000104829	7	Psmb4
Naa40	7.05698e-09	0.926287	0.261	0.131	0.000105509	7	Naa40
Trim37	7.18179e-09	0.865696	0.285	0.148	0.000107375	7	Trim37
Sarnp1	7.83454e-09	0.520337	0.614	0.423	0.000117134	7	Sarnp
Tceal91	8.085e-09	0.629554	0.498	0.318	0.000120879	7	Tceal9
Gtf3a1	9.19912e-09	0.773414	0.373	0.219	0.000137536	7	Gtf3a
Gar11	9.47128e-09	0.714933	0.414	0.254	0.000141605	7	Gar1
Polr2f2	9.56912e-09	0.618423	0.53	0.354	0.000143068	7	Polr2f
Vdac11	1.01443e-08	0.663411	0.474	0.303	0.000151667	7	Vdac1
Ndufa11	1.05474e-08	0.591389	0.518	0.341	0.000157695	7	Ndufa11
[truncated: 2,298 more rows]

## Sheet: Supplementary Table 1B
Supplementary Table 1B. Marker genes for cluster cell-type identification from the Hérault et al. dataset.
tissueType	cellName	geneSymbolmore1	geneSymbolmore2	shortName
HSC	pMast	Cpa3,Ctsg,Fcer1a,Ms4a2,Csrp3,Cd200r3,Ms4a3,Hdc,Fcgr3,Rnase12,Clec12a,Cyp4f18,Cyp11a1,Cst7,Cebpa,Alox5,Ccr1,Emilin2,Ltb4r1,Gpr34,Alox15,Gm11697,Atp1b1,Padi2,Lilr4b,Chst13,Lilrb4a,Lcn2,Il6,Igsf6,Poln,Cdh1,Sytl3,Papss2,Grm6,D430036J16Rik,Alox12e,Tyrobp,Atp8b4,1700020L24Rik,Lgals3,Sema4a,Ldhc,Anxa3,Pi16,Lat2,Scin,AB124611,Fam129a,Ccl3,Ets1,Fcgr2b,Fam46a,Mcpt8,Hvcn1,Cxcr2,Nucb2,Igfbp7,Stx3,Prss34,Ap3s…
HSC	pNeu	Mpo,Ctsg,Ccl9,Ms4a3,Cd48,Cst7,Tyrobp,BC035044,Clec12a,Anxa3,Cebpa,Cebpe,Fcgr3,Hp,Hdc,Igsf6,Atp8b4,Slc4a8,Trem3,Dmkn,Elane,F630028O10Rik,Irf8,Sell,1700020L24Rik,Bex6,Ly6c2,Rab44,Cpa3,Fcgr2b,Ap3s1,Plac8,Cd53,Tm6sf1,F13a1,Nkg7,Adgrg3,Hk3,Palm,Cd52,Lgals1,Milr1,Ncf1,Tespa1,Prss57,Ltb4r1,Serpinb1a,Calr,Ptma,H2afy,Msrb1,B4galnt1,Pgam1,Gpx1,Alas1,Sec61b,Arl11,Spns3,Gng12,Ndufa4,Lat2,Ms4a6c,Sdf2l1,Cks2,P…
HSC	pEr	Car1,Aqp1,Gm15915,Klf1,Clec4d,Csrp3,Tspo2,Gata1,Mfsd2b,Atp1b2,Ermap,Gypa,Prss50,Scin,Rec114,Slc45a3,Pdzph1,St8sia6,Slc38a5,Gna14,Rhd,Optn,Samd14,Cst7,Trib2,Abcb4,Fam46a,Siglecf,Steap3,Sphk1,Ces2g,Plac8,Cks2,Atpif1,Cdk6,Cd48,Emilin2,Ass1,Epor,Nkg7,Mns1,Gm17590,Blvrb,S100a10,Lgals1,Ifngr1,Ctse,Ugcg,Necap2,Epdr1,Icam4,Hdgf,Ap3s1,Vamp5,Hmgb2,Ptma,Hmgb3,Atp13a3,Rgs10,Slc22a3,Smim1,Tnfaip2,Cpa3,Gng12,N…
HSC	pL2	Iglc2,Mzb1,Iglc1,Iglc3,Ly6d,Cd79a,Tnfrsf17,Slamf7,Iglv1,Derl3,Iglv3,Gm43291,Ms4a1,Fcrla,Pou2af1,Igkj2,Vpreb3,Hepacam2,Cacna1s,Eaf2,Cmah,Cybb,Slamf9,Prg2,St6gal1,Chst1,Igkv1-135,Oosp1,Blnk,Ly6k,Aldh3b1,Sdc1,Ikzf3,Ly6c2,Fut1,Gm5547,Bhlhe41,Ctss,St8sia6,Slpi,Fam46c,Jchain,Edem1,Trp53inp1,Cyp4f18,Pycr1,Txndc5,Ighm,Tram2,Evi2a,Igkc,Rbm47,Cd74,Itgal,Txndc11,Epcam,Creld2,Cd52,Xbp1,Serp1,Fam214a,Pdia4,Pr…
HSC	pL1	Trbc2,Il7r,Cxcr6,Ccr9,Tcrg-C4,Il2rb,Bcl11b,Cysltr1,Arg1,Il2ra,Sh2d2a,Trbc1,Ccr2,Tktl1,Tcrg-C1,Gm26740,Icos,Rnf128,Ikzf3,Klrg1,Cd7,Skap1,Stab2,Tcf7,Txk,Klrk1,Ms4a4c,Grap,Clec2i,Il1rl1,Id2,Thy1,Ly86,Ms4a4b,Ccl5,Lpxn,Gimap3,Cd52,Sema4a,Bmp7,Ly6c1,Itgb7,Evl,Cd53,AB124611,Ltb4r1,Phlda1,Tmsb4x,Ahnak,Lgals3,Inpp4b,4930523C07Rik,Klrb1f,Tmsb10,Lztfl1,Acp5,Gata3,Sh3bgrl3,Ly6c2,Anxa6,St3gal6,Itgb2,Ly6e,Xlr4…
HSC	pMk	Gp1bb,F2rl2,Mfsd2b,Gata1,Treml1,Tuba8,Itga2b,Serpine2,Gp5,Pf4,Rgs10,Plek,Slc14a1,Tmsb4x,Aqp1,Pdcd4,Rab27b,Rap1b,Icam4,Tgfb1,F2r,Nkg7,Gp9,Sla,Unc119,Etfb,Cd9,Rabgap1l,Zeb2,Pbx1,Atpif1,Lims1,Samd14,Ppia,Fermt3,Sdpr,Slc25a5,Hmgb3,Ldha,Ppp1ca,Il12a,Mef2c,Ptma,H2afz,Rps27l,Cdk6,Mcm2,Eif5a,Ckap2l,Pfn1,Ran,Bin1,Runx3,Snrpb,Dusp3,Cfl1,Cdca7,Arrb2,Nme1,Erh,Ranbp1,Hn1,Dut,Nrgn,Nap1l1,Hsp90aa1,Dynll1,Adgrg3…
HSC	div	Hmgb2,Ube2c,Birc5,Cks2,Top2a,Ccnb2,Cenpa,H2afx,Cdca8,Cenpf,Cdc20,Lockd,Cdk1,Nusap1,Tuba1b,Cks1b,Tubb5,Cdca3,Smc4,Stmn1,H2afz,Pbk,Ube2s,Spc24,Mki67,Ccnb1,Tubb4b,Prc1,Fam64a,H2afv,Knstrn,Smc2,Tpx2,Ccna2,Hmmr,2810417H13Rik,Aurkb,Spc25,Kif22,Tk1,Cdkn3,Cenpe,Aurka,Racgap1,Neil3,Ccdc34,Mis18bp1,Incenp,Plk1,Kif20b,Ckap2l,Mad2l1,Casc5,Tacc3,Fbxo5,Cenpm,Asf1b,Nuf2,Psrc1,Cenpw,Shcbp1,Cdca2,Cit,Kif11,Cdca5,…
HSC	rep	Dut,Lig1,Stmn1,Mcm6,Ung,Mcm3,Tuba1b,Tipin,Mcm5,Mcm7,Tyms,Slbp,Cdca7,Gmnn,Rpa2,Dctpp1,Hells,Syce2,Ranbp1,Tk1,Pcna,Dtymk,Mcm2,Ran,Rfc2,H2afz,Nasp,Dnajc9,Cdt1,Prim1,Uhrf1,Dhfr,Gins2,Mif,Nrm,Slc25a5,Fen1,Erh,Fam111a,Dtl,Cenpm,Ptma,Apitd1,Ppia,Mcm4,Rad51,E2f1,Timeless,Dscc1,Chek1,Rfc4,Cenpk,Cdk4,Siva1,Rad51ap1,Tcf19,2810417H13Rik,Spc24,Clspn,Dnmt1,Cenph,Hint1,Rrm1,Hmgb2,Chaf1a,Nap1l1,Atad2,Snrpd1,Tubb…
HSC	diff	Cd34,Ctla2a,Cmtm7,Ramp1,Arhgdib,Serpinb1a,Gm5111,Gmfg,Coro1a,Sox4,Cd27,Flt3,Vim,H2afy,Ptpre
HSC	np4	Actb,Slc39a1,Notch2,Cbx3,Abhd2,Kdm6b,Marf1,Acot2,Pdcd4,Gnb1,Spry2,Pim1,Pam,Rpgrip1,Arglu1,Insig1,Gm28875,Nfia,Pan3,Lrrc8a,Alkbh5,Wtap,Rbm15,Gatad1,Supt16,Kmt2d,Srsf2,Paip1,Zscan26,Kdelr2,Otub1,Foxo3,Cdk6,Gsk3b,Gm2a,Birc6,Erdr1
HSC	np3	Ifitm1,Pdzk1ip1,Mllt3,Ly6a,Ltb,Sult1a1,Cd74,Meg3
HSC	ifn	Iigp1,Gm4951,Ifit1,Ifit3,Isg15,Rtp4,Irf7,Igtp,Stat1,Zbp1,Ly6a,Ifitm3,Ifi44,Gbp4,Oasl2,Usp18,Rsad2,Serpina3f,Xaf1,Cd74,Ly6e,B2m,Gbp2,Oasl1,F830016B08Rik,Gbp7,Phf11d,Shisa5,Ube2l6,Irgm1,Serpina3g,H2-Aa,Ifi203,Bst2,Cmpk2,Slfn5,Ifi47,Herc6,Mndal,AW112010,H2-Eb1,Trim30a,Irgm2,Dhx58,H2-K1,H2-D1,Parp14,Slfn2,Gbp3,Oas1a,Irf9,H2-Ab1,Isg20,Trim12a,H2-T22,Ddx58,Trim12c,Tap1,Samd9l,Irf1,Ltb,Mettl7a1,Trafd1,I…
HSC	np2	Ifitm1,Mllt3,Pdzk1ip1,Malat1,Ifitm3,Gstm1,Sult1a1,Procr,Txnip,Apoe,Hacd4,Ltb,Cldn5,Eif4a2,Ramp2,Trim47,Meg3,Bex4,Tmem176a,Gimap1,Krt18,Gimap6,Gng11,Smpdl3a,Ly6a,Bex1,Sbspon,Clec1a,Mettl7a1,Selm,Clu,Gda,Nupr1,Lpar6,Pik3r1,Gimap5,Cd74
HSC	np1	Ifitm3,Clu,Sult1a1,Nupr1,Mt1,Mycn,Tgm2,Uba7,Mt2,Cldn5,S100a6
HSC	tgf	Fos,Hes1,Dusp1,Junb,Klf2,Zfp36,Nr4a1,Fosb,Tsc22d2,Cdkn1a,Id1,Klf4,Nr4a2,Atf3,Gm26532,Skil,Jun,Ier2,Btg2,Jund,Ppp1r15a,H3f3b,Socs3,Cyr61,Bhlhe40,Egr1,Smad7,Klf6,Klf9,Id3,Rhob,Ubc,Neat1,Maff,Cebpb,Csrnp1,Ddx5,Mcl1,Plk2,Adgrg1,Txnip,Pnrc1,Ccnl1,Rgs1,Fam110a,Trib1,Sik1,H2-D1,Nfkbiz,Dusp5,Trim47,Tsc22d1,Ier5,Serinc3,Hspa5,Dnajb1,Eef2,Glul,Eif4a2,Rlim,mt-Co1,Gm10116,Zfand5,Zfp36l2,Irf2bpl,Cdk11b,Ccnt1,…
