# Supplementary material for: PURE-seq identifies Egr1 as a Potential Master Regulator in Murine Aging by Sequencing Long-Term Hematopoietic Stem Cells
Source: Research Square preprint supplement (doi:10.21203/rs.3.rs-4863813/v1), 2024-08-12
Supplement: Supplementary file 2 [file Supplementary Table 2.xlsx]

## Sheet: Supplementary Table 2A
Supplementary Table 2A. LT-HSCs cell count per cluster for pre-sort HSC control samples
	Cluster	Label	Count
1	0	LTHSC	0
2	1	LTHSC	0
3	2	LTHSC	0
4	3	LTHSC	0
5	4	LTHSC	15
6	5	LTHSC	0
7	6	LTHSC	0
8	7	LTHSC	24
9	8	LTHSC	0
10	9	LTHSC	0
11	10	LTHSC	0
12	0	Other	17633
13	1	Other	9243
14	2	Other	2171
15	3	Other	2132
16	4	Other	2070
17	5	Other	1333
18	6	Other	904
19	7	Other	517
20	8	Other	361
21	9	Other	354
22	10	Other	287

## Sheet: Supplementary Table 2B
Supplementary Table 2A. LT-HSCs cell count per cluster for PURE-seq enriched LT-HSCs
	Cluster	Label	Count
1	0	LTHSC	899
2	1	LTHSC	803
3	2	LTHSC	566
4	3	LTHSC	188
5	4	LTHSC	360
6	5	LTHSC	508
7	6	LTHSC	57
8	7	LTHSC	41
9	8	LTHSC	19
10	9	LTHSC	46
11	10	LTHSC	29
12	11	LTHSC	0
13	12	LTHSC	0
14	0	Other	466
15	1	Other	448
16	2	Other	214
17	3	Other	505
18	4	Other	308
19	5	Other	80
20	6	Other	225
21	7	Other	208
22	8	Other	224
23	9	Other	191
24	10	Other	123
25	11	Other	126
26	12	Other	91

## Sheet: Supplementary Table 2C
Supplementary Table 2C. LT-HSCs cell count per cluster for PURE-seq enriched LT-HSCs after reclustering
	Cluster	Label	Count
1	0	LTHSC	187
2	1	LTHSC	155
3	2	LTHSC	144
4	0	Other	1
5	1	Other	0
6	2	Other	2
